# Supplementary material for: Longitudinal wastewater sampling in buildings reveals temporal dynamics of metabolites
Source: PLoS Comput Biol. 2020 Jun 29;16(6):e1008001. doi: 10.1371/journal.pcbi.1008001 (PMC7351223; doi:10.1371/journal.pcbi.1008001)
Supplement: S1 Table — If any of the following showed up in the name or chemical formula for a putative name for a feature, it was removed from consideration as a plausible name. (XLSX) [file pcbi.1008001.s001.xlsx]

## Sheet: S1_table
Elements	'Ac','Mt','Ag','Al','Na','Am','Nb','Ar','Nd','As','Ne','At','Au','Ba','Be','Og', 'Bi','Pa','Pb','Ca','Pd','Cd','Pm','Ce','Pr','Pt','Cm','Pu','Ra','Rb','Cr','Re','Rf', 'Cu','Rg','Rh','Db','Rn','Ds','Ru','Dy','Er','Sb','Es','Eu','Se','Sg','Fe','Si','Fl', 'Sm','Fm','Fr','Sr','Ga','T','Gd','Ta','Ge','Tb','Tc','He','Te','Th','Hg','Ti','Tl', 'Tm','Ts’,'U','Ir','V','K','W','Kr','Xe','La','Y','Li','Yb','…
Group_names	'Group','hyltin','stann','nickel','medronic','copolymer','residue', 'Bioconjugate','conjugate','radical','borthiin','hydrochloride','vanadyl', 'intermediate', 'all-trans-retinol-R'
