# Supplementary material for: Longitudinal wastewater sampling in buildings reveals temporal dynamics of metabolites
Source: PLoS Comput Biol. 2020 Jun 29;16(6):e1008001. doi: 10.1371/journal.pcbi.1008001 (PMC7351223; doi:10.1371/journal.pcbi.1008001)
Supplement: S8 Table — Including mz, rt, ionization mode, charge-correction, compound ID used, stability type in each building, classifier use and K-means cluster membership. (XLSX) [file pcbi.1008001.s008.xlsx]

## Sheet: S8_table
true_labels	mz	ionization mode	charge-corrected	mzmin	mzmax	rt	rtmin	rtmax	name_used (with annotation score for MetFrag matched, **=level 3 ID with associated database and PPM error)	stability_type_b7	stability_type_b61	stability_type_b84	RF_feat_avg	RF_feat_std	LR_model_1_sum	LR_model_2_sum	LR_model_3_sum	b7_cluster	b61_cluster	b84_cluster
3	100.933	negative	no	100.933	100.934	544.814	527.925	550.028	100.9335Da/544.81424s	stable	stable	stable	0.0001414	0.000110056	2	1	1	38	9	90
6	101.934	negative	no	101.934	101.934	570.764	536.859	599.529	101.93365Da/570.76367s	stable	stable	stable	7.38595e-05	7.65353e-05	0	1	0	98	52	1
11	102.957	negative	no	102.957	102.957	30.1904	21.9535	31.272	102.95678Da/30.19043s	stable	stable	stable	0.000138356	0.000141666	0	2	0	0	28	47
12	102.989	negative	no	102.989	102.989	27.4603	24.9916	28.5632	102.98861Da/27.46027s	stable	stable	stable	6.69534e-05	7.12982e-05	0	2	0	7	70	40
13	103.04	negative	no	103.039	103.04	105.144	70.0605	129.198	[('4-hydroxybutyric acid', 1.0), ('(r)-3-hydroxybutyric acid', 1.0), ('2s-hydroxybutanoic acid', 1.0), ('(r)-3-hydroxyisobutyric acid', 1.0), ('alpha-hydroxyisobutyric acid', 1.0), ('2-hydroxybutyric acid', 1.0), ('(r)-3-hydroxyisobutyric acid', 1.0), ('(s)-3-hydroxybutyric acid', 1.0), ('4-hydroxybutyric acid', 1.0), ('alpha-hydroxyisobutyric acid', 1.0), ('ethoxyacetic acid', 1.0), ('4-hydroxya…	stable	stable	stable	0.000223381	0.000240054	0	2	0	14	1	10
16	104.954	negative	no	104.954	104.954	30.1904	21.9535	31.272	104.95382Da/30.19043s	stable	stable	stable	0.000148901	0.000190952	0	2	0	7	0	50
18	105.019	negative	no	105.019	105.019	38.4497	35.7312	40.1648	[('glyceric acid', 1.0), ('d-2,3-dihydroxypropanoic acid', 1.0)]	Class 2	Class 1	stable	8.99751e-05	0.000124061	0	1	0	50	46	82
20	107.05	negative	no	107.05	107.05	287.569	282.424	288.774	[('anisole**', '1.193', 'M-H_meta', 'C7H8O1'), ('<i>cis</i>-bicyclo[3.2.0]hept-2-en-6-one**', '1.193', 'M-H_meta', 'C7H8O1'), ('benzyl alcohol**', '1.193', 'M-H_meta', 'C7H8O1'), ('m-cresol**', '1.193', 'M-H_meta', 'C7H8O1'), ('o-cresol**', '1.193', 'M-H_meta', 'C7H8O1'), ('p-cresol**', '1.193', 'M-H_meta', 'C7H8O1'), ('p-Cresol**', '1.193', 'M-H_hmdb', 'C7H8O1'), ('m-Cresol**', '1.193', 'M-H_hmd…	stable	Class 1	stable	0.000131949	0.000123678	2	2	0	83	71	49
21	108.022	negative	no	108.022	108.022	305.814	304.215	306.466	[('p-benzosemiquinone', 1.0)]	Class 3	Class 2	Class 1	0.000418976	0.000345397	19	19	0	50	55	83
22	108.902	negative	no	108.902	108.902	31.0462	29.1301	32.2075	108.90189Da/31.04624s	stable	stable	stable	0.00119158	0.000868882	5	2	2	40	34	99
23	108.989	negative	no	108.989	108.989	28.078	26.9655	28.5872	[('2-Propene-1-thiol**', '2.123', 'Cl_hmdb', 'C3H6S1'), ('1-Propene-1-thiol**', '2.123', 'Cl_hmdb', 'C3H6S1')]	Class 3	stable	stable	9.04681e-05	8.68262e-05	0	0	0	59	38	2
24	109.029	negative	no	109.029	109.029	197.333	196.263	201.714	[('hydroquinone**', '0.667', 'M-H_meta', 'C6H6O2'), ('pyrocatechol**', '0.667', 'M-H_meta', 'C6H6O2'), ('1,3-benzenediol**', '0.667', 'M-H_meta', 'C6H6O2'), ('Pyrocatechol**', '0.667', 'M-H_hmdb', 'C6H6O2'), ('Hydroquinone**', '0.667', 'M-H_hmdb', 'C6H6O2'), ('(E,E)-2,4-Hexadienedial**', '0.667', 'M-H_hmdb', 'C6H6O2'), ('1,3-Benzenediol**', '0.667', 'M-H_hmdb', 'C6H6O2'), ('5-Methyl-2-furancarbox…	Class 1	stable	stable	0.000621306	0.000452149	3	5	0	61	87	84
25	110.899	negative	no	110.899	110.899	31.118	29.1301	32.3936	110.89894Da/31.11802s	stable	Class 3	Class 3	0.000522939	0.000389697	3	6	31	67	92	37
26	110.976	negative	no	110.975	110.976	38.8466	36.2533	40.1648	[('monomethyl sulfate', 1.0)]	Class 2	Class 3	Class 3	0.000877587	0.000655769	39	16	0	91	21	21
27	111.009	negative	no	111.008	111.009	58.9807	44.9795	63.6719	[('3-furoic acid', 1.0), ('2-furoic acid', 1.0), ('2-furoate', 1.0)]	stable	Class 1	stable	0.0022428	0.00127386	2	9	0	37	19	11
28	111.009	negative	no	111.009	111.009	158.016	152.864	163.796	[('3-furoic acid', 1.0), ('2-furoic acid', 1.0), ('2-furoate', 1.0)]	stable	stable	stable	0.000407903	0.000453931	3	3	49	69	44	49
30	111.081	negative	no	111.081	111.082	294.167	292.899	295.057	[('(z)-4-heptenal', 1.0), ('(e)-4-hepten-2-one', 1.0), ('trans-2-trans-4-heptadien-1-ol', 1.0), ('lmfa05000119', 1.0), ('lmfa06000021', 1.0), ('lmfa12000080', 1.0), ('(e)-4-hepten-2-one', 1.0)]	Class 1	stable	stable	0.00011808	0.000131196	0	5	1	93	18	64
33	112.999	negative	no	112.999	112.999	49.0066	45.4695	51.0829	112.99907Da/49.00662s	Class 1	stable	stable	0.000207664	0.000188378	0	0	0	31	36	73
34	113.989	negative	no	113.989	113.989	545.328	499.842	575.185	113.98875Da/545.32806	stable	stable	stable	0.000119939	0.000107493	0	5	1	94	62	63
37	114.989	negative	no	114.989	114.989	27.4702	24.9916	28.6327	114.98857Da/27.47016s	stable	stable	stable	8.57527e-05	8.48433e-05	0	1	0	7	70	40
39	115.04	negative	no	115.04	115.04	154.108	142.98	165.008	[('methyl 3-hydroxybut-2-enoate**', '1.017', 'M-H_lipid', 'C5H8O3')]	stable	stable	stable	0.000237003	0.000189593	0	7	21	13	93	42
43	117.019	negative	no	117.019	117.019	80.7534	74.265	88.418	[('succinic acid', 1.0), ('methylmalonic acid', 1.0), ('succinate', 1.0), ('methylmalonate', 1.0), ('(3r)-3-hydroxy-4-oxobutanoate', 1.0), ('4-hydroxy-2-oxobutanoic acid', 1.0), ('xi-3-hydroxy-2-oxobutanoic acid', 1.0), ('succinic acid', 1.0), ('succinate', 1.0)]	Class 1	Class 1	stable	0.000253991	0.000221265	0	10	0	43	73	41
44	117.056	negative	no	117.056	117.056	198.858	182.769	208.132	[('2-hydroxyvaleric acid', 1.0), ('3-hydroxyvaleric acid', 1.0), ('4-hydroxy-valeric acid', 1.0), ('5-hydroxypentanoic acid', 1.0), ('2-ethylhydracrylic acid', 1.0), ('2-hydroxy-2-methylbutyric acid', 1.0), ('2-hydroxy-3-methyl-butyric acid', 1.0), ('3-hydroxy-2-methyl-[s-(r,r)]-butanoic acid', 1.0), ('3-hydroxyisovaleric acid', 1.0), ('4-hydroxyisovaleric acid', 1.0), ('5-hydroxypentanoate', 1.0…	stable	stable	stable	0.000165563	0.00013501	3	5	0	40	98	92
45	117.056	negative	no	117.056	117.056	162.03	156.966	172.299	[('3-hydroxyvaleric acid', 1.0), ('4-hydroxy-valeric acid', 1.0), ('5-hydroxypentanoic acid', 1.0), ('3-hydroxyisovaleric acid', 1.0), ('4-hydroxyisovaleric acid', 1.0), ('methyl 3-hydroxybutyrate', 1.0), ('5-hydroxypentanoic acid', 1.0), ('4-hydroxyisovaleric acid', 1.0), ('3-hydroxyvaleric acid', 1.0), ('3-hydroxyisovaleric acid', 1.0), ('5-hydroxypentanoate', 1.0), ('3-hydroxyisovalerate', 1.0…	stable	stable	stable	0.000251907	0.00017236	1	6	0	37	13	31
50	118.966	negative	no	118.966	118.966	27.4208	24.9916	28.561	118.96618Da/27.42077	stable	stable	stable	0.000120174	0.000129154	0	0	0	77	33	40
51	118.993	negative	no	118.993	118.993	27.1734	25.9808	27.8234	118.99293Da/27.17345s	Class 3	Class 3	stable	0.000152473	0.000125417	3	1	0	2	19	38
52	119.035	negative	no	119.035	119.035	48.4478	42.512	56.6675	[('2,4-dihydroxybutanoic acid', 1.0), ('4-deoxy-erythronic acid', 1.0), ('d-threose', 1.0), ('2,4-dihydroxybutanoic acid', 1.0), ('4-deoxythreonic acid', 1.0)]	stable	stable	stable	0.000232423	0.000250856	0	1	0	83	1	28
54	120.955	negative	no	120.955	120.955	26.2975	24.3105	30.3945	120.95472Da/26.29754s	stable	stable	stable	0.000199273	0.000200545	2	1	2	53	26	9
55	121.029	negative	no	121.029	121.03	273.208	250.804	275.612	[('2-hydroxybenzaldehyde**', '0.602', 'M-H_meta', 'C7H6O2'), ('tropolone**', '0.602', 'M-H_meta', 'C7H6O2'), ('4-hydroxybenzaldehyde**', '0.602', 'M-H_meta', 'C7H6O2'), ('2-methyl-1,4-benzoquinone**', '0.602', 'M-H_meta', 'C7H6O2'), ('3-hydroxybenzaldehyde**', '0.602', 'M-H_meta', 'C7H6O2'), ('Benzoic acid**', '0.602', 'M-H_hmdb', 'C7H6O2'), ('4-Hydroxybenzaldehyde**', '0.602', 'M-H_hmdb', 'C7H6O…	stable	stable	stable	0.00115887	0.000695023	14	6	0	13	13	70
56	121.029	negative	no	121.029	121.029	222.291	194.353	228.866	[('tropolone', 1.0), ('4-hydroxybenzaldehyde', 1.0), ('3-hydroxybenzaldehyde', 1.0), ('2-hydroxybenzaldehyde', 1.0), ('2-hydroxybenzaldehyde', 1.0), ('benzoic acid', 1.0)]	stable	stable	stable	0.000237729	0.000281358	0	1	0	83	13	10
57	121.029	negative	no	121.029	121.029	328.239	327.198	329.036	[('4-hydroxybenzaldehyde', 1.0), ('3-(2-furanyl)-2-propenal', 1.0), ('2-hydroxybenzaldehyde', 1.0), ('3-hydroxybenzaldehyde', 1.0), ('2-hydroxybenzaldehyde', 1.0)]	stable	stable	stable	0.000122991	0.000128169	0	2	0	40	13	69
58	121.044	negative	no	121.044	121.044	78.7407	72.5094	86.5234	[('5-Phenyl-1,3-pentadiyne**', '1.141', 'M-H-H2O_hmdb', 'C11H8')]	stable	stable	stable	0.000117389	0.000119752	0	2	0	15	85	75
59	121.066	negative	no	121.066	121.066	300.086	298.981	300.391	[('4-ethylphenol', 1.0), ('2-ethylphenol', 1.0), ('3-ethylphenol', 1.0), ('2,5-dimethylphenol', 1.0), ('2,3-dimethylphenol', 1.0), ('2,6-dimethylphenol', 1.0), ('1-methoxy-2-methylbenzene', 1.0), ('1-methoxy-4-methylbenzene', 1.0), ('3,4-dimethylphenol', 1.0), ('1-phenylethanol', 1.0), ('lmfa06000036', 1.0)]	Class 3	stable	stable	0.000167856	0.000167528	0	2	0	64	3	26
64	123.045	negative	no	123.045	123.045	305.875	304.215	306.4	[('4-methylcatechol', 1.0), ('1-(2-furanyl)-2-propanone', 1.0), ('2-acetyl-3-methylfuran', 1.0), ('2-acetyl-5-methylfuran', 1.0), ('1-(2-furanyl)-1-propanone', 1.0), ('cis,trans-hepta-2,4,6-trienoic acid', 1.0)]	Class 1	Class 1	Class 1	0.000513133	0.000460676	39	21	0	50	74	83
65	124.007	negative	no	124.007	124.007	32.167	24.7679	33.124	[('taurine', 1.0)]	stable	Class 3	stable	0.000537991	0.000344491	3	25	0	18	76	93
69	124.991	negative	no	124.991	124.992	34.4796	32.1807	54.0614	[('2-hydroxyethanesulfonate', 1.0)]	stable	stable	stable	0.00604688	0.00180323	33	0	50	29	1	86
70	125.097	negative	no	125.096	125.097	326.643	325.471	337.985	[('lmfa12000095', 1.0), ('lmfa12000108', 1.0), ('lmfa12000237', 1.0), ('lmfa05000493', 1.0), ('lmfa12000036', 1.0), ('lmfa06000031', 1.0), ('(z)-5-octenal', 1.0), ('lmfa06000033', 1.0), ('sulcatone', 1.0), ('4-octen-3-one', 1.0), ('5-octen-2-one', 1.0), ('(3xi,5z)-1,5-octadien-3-ol', 1.0), ('5-methyl-5-hepten-2-one', 1.0), ('sulcatone', 1.0), ('6-octenal', 1.0), ('(z)-5-octenal', 1.0), ('2,5-octa…	Class 1	Class 1	stable	8.15866e-05	9.20367e-05	0	0	0	93	18	64
71	125.097	negative	no	125.096	125.097	281.523	279.703	282.512	[('2-octenal', 1.0), ('(3xi,5z)-1,5-octadien-3-ol', 1.0), ('2-octen-4-one', 1.0), ('1-octen-3-one', 1.0), ('3-methyl-3-hepten-2-one', 1.0), ('4-octen-3-one', 1.0), ('3-octen-2-one', 1.0), ('(s,e)-filbertone', 1.0), ('5-octen-2-one', 1.0), ('2-ethylidenehexanal', 1.0), ('(z)-5-octenal', 1.0), ('2,5-octadien-1-ol', 1.0), ('(3e,5z)-3,5-octadien-1-ol', 1.0), ('(2e,4e)-2,4-octadien-1-ol', 1.0), ('2-et…	Class 2	Class 2	Class 2	0.000145758	0.000134886	0	7	1	24	77	7
77	126.903	negative	no	126.903	126.904	30.653	28.3771	31.5875	[('bromic acid**', '1.829', 'M-H_chebi', 'Br1H1O3')]	stable	Class 1	stable	0.000461345	0.000402335	3	3	11	21	60	37
82	127.04	negative	no	127.04	127.04	220.546	219.482	223.709	[('lmfa01060174', 1.0), ('lmfa01050273', 1.0), ('osmundalactone', 1.0), ('3-hydroxy-4,5-dimethyl-2(5h)-furanone', 1.0), ('l-erythro-5-(1-hydroxyethyl)-2(5h)-furanone', 1.0), ('(2z,4z)-2-hydroxyhexa-2,4-dienoate', 1.0)]	stable	stable	stable	0.00297322	0.00151943	50	24	0	11	16	15
83	127.051	negative	no	127.051	127.051	257.886	256.183	260.301	[('dihydrothymine**', '0.402', 'M-H_meta', 'C5H8N2O2'), ('Dihydrothymine**', '0.402', 'M-H_hmdb', 'C5H8N2O2'), ('Squamolone**', '0.402', 'M-H_hmdb', 'C5H8N2O2'), ('L-Cyclo(alanylglycyl)**', '0.402', 'M-H_hmdb', 'C5H8N2O2'), ('Pyroglutamine**', '0.402', 'M-H_hmdb', 'C5H8N2O2')]	stable	stable	stable	0.000935009	0.000659202	0	6	4	83	40	68
85	128.035	negative	no	128.035	128.035	64.0508	32.9955	69.1188	[('n-acryloylglycine', 1.0), ('1-pyrroline-4-hydroxy-2-carboxylate', 1.0), ('5-oxoprolinate', 1.0), ('(3r,5s)-1-pyrroline-3-hydroxy-5-carboxylic acid', 1.0), ('dimethadione', 1.0), ('4-oxoproline', 1.0), ('pyroglutamic acid', 1.0), ('l-1-pyrroline-3-hydroxy-5-carboxylate', 1.0)]	stable	stable	stable	0.000273787	0.000257171	0	2	0	18	40	97
90	129.019	negative	no	129.019	129.019	99.2523	88.878	121.423	[('itaconic acid', 1.0), ('glutaconic acid', 1.0), ('mesaconic acid', 1.0), ('gamma-delta-dioxovaleric acid', 1.0), ('methyl hydrogen fumarate', 1.0), ('2-hydroxyglutaric acid lactone', 1.0), ('2,5-dioxopentanoate', 1.0), ('2-pentendioate', 1.0), ('itaconate', 1.0), ('acetylpyruvate', 1.0), ('(e)-glutaconate', 1.0), ('2-methylmaleate', 1.0), ('4,5-dioxopentanoate', 1.0)]	stable	stable	stable	0.000145218	0.00013857	0	2	0	37	1	98
91	129.019	negative	no	129.019	129.019	139.784	129.117	171.576	[('2,5-dioxopentanoate', 1.0), ('itaconate', 1.0), ('acetylpyruvate', 1.0), ('(e)-glutaconate', 1.0), ('2-methylmaleate', 1.0), ('4,5-dioxopentanoate', 1.0), ('itaconic acid', 1.0), ('glutaconic acid', 1.0), ('mesaconic acid', 1.0), ('gamma-delta-dioxovaleric acid', 1.0), ('methyl hydrogen fumarate', 1.0), ('2-hydroxyglutaric acid lactone', 1.0), ('2-pentendioate', 1.0)]	stable	stable	stable	0.00017905	0.000142102	0	2	0	26	43	85
92	129.019	negative	no	129.019	129.02	59.591	22.7796	76.1256	[('2,5-dioxopentanoate', 1.0), ('4,5-dioxopentanoate', 1.0), ('itaconate', 1.0), ('acetylpyruvate', 1.0), ('2-methylmaleate', 1.0), ('(e)-glutaconate', 1.0), ('gamma-delta-dioxovaleric acid', 1.0), ('2-hydroxyglutaric acid lactone', 1.0), ('itaconic acid', 1.0), ('mesaconic acid', 1.0), ('methyl hydrogen fumarate', 1.0), ('2-pentendioate', 1.0), ('glutaconic acid', 1.0)]	stable	stable	stable	0.000501052	0.000373248	1	6	0	18	67	98
93	129.038	negative	no	129.038	129.039	63.5605	60.831	68.1172	[('2-[(Methylthio)methyl]-2-butenal**', '4.155', 'M-H_hmdb', 'C6H101'), ('S-2-Propenyl propanethioate**', '4.155', 'M-H_hmdb', 'C6H101'), ('2-Ethyldihydro-3(2H)-thiophenone**', '4.155', 'M-H_hmdb', 'C6H101')]	Class 2	Class 2	stable	0.000374873	0.000384953	0	2	0	11	40	63
94	129.056	negative	no	129.055	129.056	250.92	204.769	254.212	[('sherry lactone', 1.0), ('ethyl acetoacetate', 1.0), ('4-acetylbutyrate', 1.0), ('2-hydroxyethyl methacrylate', 1.0)]	stable	stable	stable	0.00197447	0.00116528	19	7	50	13	98	48
100	129.936	negative	no	129.936	129.936	516.76	490.014	541.266	129.93618Da/516.76022s	stable	stable	stable	0.000118138	0.000121961	1	5	0	4	20	91
104	130.966	negative	no	130.965	130.967	26.9351	2.90145	37.4518	[('phosphinic acid**', '2.985', '2M-H_chebi', 'H3O2P1'), ('phosphonous acid**', '2.985', '2M-H_chebi', 'H3O2P1'), ('phosphinic acid**', '2.985', '2M-H_chebi', 'H3O2P1'), ('phosphonous acid**', '2.985', '2M-H_chebi', 'H3O2P1')]	stable	stable	stable	0.000135277	0.000113216	0	1	0	77	33	40
105	130.984	negative	no	130.984	130.984	27.4389	24.9916	28.561	130.98359Da/27.4389s	stable	stable	stable	0.00011398	0.000112041	0	2	0	7	70	40
107	131.035	negative	no	131.035	131.035	175.03	159.718	184.735	[('glutarate', 1.0), ('4-hydroxy-2-oxopentanoate', 1.0), ('2-(hydroxymethyl)-4-oxobutanoate', 1.0), ('3-hydroxy-3-methyl-2-oxobutanoic acid', 1.0), ('(s)-2-acetolactate', 1.0), ('lmfa01020277', 1.0), ('dimethylmalonic acid', 1.0), ('ethylmalonic acid', 1.0), ('methylsuccinic acid', 1.0), ('glutaric acid', 1.0), ('dimethylmalonic acid', 1.0), ('2-hydroxy-4-oxopentanoic acid', 1.0)]	stable	stable	stable	0.0001703	0.000147655	0	1	0	64	98	10
108	131.035	negative	no	131.035	131.035	151.254	144.522	158.117	[('monoethyl malonic acid', 1.0), ('ethylmalonic acid', 1.0), ('glutaric acid', 1.0), ('methylsuccinic acid', 1.0), ('dimethylmalonic acid', 1.0), ('(s)-2-acetolactate', 1.0), ('2-hydroxy-4-oxopentanoic acid', 1.0), ('(s)-methylbutanethioic acid', 1.0), ('lmfa01020277', 1.0), ('dimethylmalonic acid', 1.0), ('glutarate', 1.0), ('4-hydroxy-2-oxopentanoate', 1.0), ('2-(hydroxymethyl)-4-oxobutanoate'…	stable	stable	stable	0.000107584	0.000121607	0	1	0	18	16	10
109	131.071	negative	no	131.071	131.071	275.425	273.979	276.285	[('5-hydroxyhexanoic acid', 1.0), ('6-hydroxyhexanoic acid', 1.0), ('2-methyl-3-hydroxyvaleric acid', 1.0), ('2-hydroxy-3-methylpentanoic acid', 1.0), ('2-hydroxycaproic acid', 1.0), ('2-ethyl-2-hydroxybutyric acid', 1.0), ('butoxyacetic acid', 1.0), ('3-hydroxyhexanoic acid', 1.0), ('hydroxyisocaproic acid', 1.0), ('(r)-2-hydroxyisocaproate', 1.0), ('2-hydroxycaproic acid', 1.0), ('dl-4-hydroxy …	stable	stable	stable	0.000385844	0.000322392	7	0	1	37	89	42
113	131.984	negative	no	131.984	131.984	27.458	24.9916	28.5632	131.98429Da/27.458s	stable	stable	stable	9.11491e-05	8.19854e-05	0	2	0	7	70	40
114	132.03	negative	no	132.03	132.03	37.7421	24.7679	39.5981	[('iminodiacetate', 1.0), ('aspartate', 1.0), ('1-deoxy-1-(n6-lysino)-d-fructose', 1.0), ('iminodiacetic acid', 1.0)]	Class 3	Class 2	stable	0.000115661	0.000126596	0	0	0	20	71	28
120	132.9	negative	no	132.9	132.9	34.3162	31.3853	35.6145	132.90006Da/34.31616s	stable	stable	stable	0.000127678	0.000146322	0	4	0	6	12	44
121	132.946	negative	no	132.946	132.946	32.4138	29.7789	33.8818	[('phosphoric acid', 1.0)]	stable	stable	stable	0.000353022	0.000262448	6	2	0	89	2	49
122	132.981	negative	no	132.981	132.981	27.4346	24.9916	28.5632	132.98104Da/27.4346s	stable	stable	stable	0.000102762	0.000122551	0	2	0	7	70	40
124	133.014	negative	no	133.014	133.014	45.4581	42.512	47.8834	[('2-dehydro-l-erythronate', 1.0), ('d-malic acid', 1.0)]	Class 2	Class 2	stable	0.00340669	0.00145088	0	36	35	95	73	54
125	133.041	negative	no	133.041	133.041	287.588	286.781	288.144	[('5-hydroxybenzimidazole**', '1.000', 'M-H_chebi', 'C7H6N2O1'), ('24G7 epitope**', '1.000', 'M-H_chebi', 'C7H6N2O1')]	Class 1	Class 1	stable	0.000874713	0.000725215	0	17	18	89	50	6
126	133.05	negative	no	133.05	133.051	102.982	92.4005	110.754	[('1-deoxy-d-xylulose', 1.0), ('(r)-glycerol 1-acetate', 1.0), ('2,3-dihydroxyvaleric acid', 1.0)]	stable	stable	stable	0.000488234	0.000475534	0	2	0	37	19	74
127	133.051	negative	no	133.05	133.051	61.1408	46.7234	71.5861	[('2,3-dihydroxyvaleric acid', 1.0), ('1-deoxy-d-xylulose', 1.0), ('(r)-2,3-dihydroxy-3-methylbutanoate', 1.0), ('2,3-dihydroxy-2-methylbutanoic acid', 1.0), ('2,3-dihydroxyvaleric acid', 1.0), ('(r)-2,3-dihydroxy-isovalerate', 1.0)]	stable	stable	stable	0.00103387	0.000749017	3	50	1	18	67	67
128	134.061	negative	no	134.061	134.061	256.134	253.869	258.159	[('2-phenylacetamide', 1.0), ('acetanilide', 1.0), ('n-benzylformamide', 1.0), ('(e)-phenylacetaldoxime', 1.0), ('2,3-dihydro-1h-pyrrolizine-5-carboxaldehyde', 1.0), ('5-(2-furanyl)-3,4-dihydro-2h-pyrrole', 1.0)]	stable	stable	stable	0.000265931	0.000332605	0	3	0	83	8	97
129	134.865	negative	no	134.865	134.865	576.287	553.513	599.529	134.86539Da/576.28668s	stable	stable	stable	7.58505e-05	8.22689e-05	0	2	0	39	11	52
133	134.895	negative	no	134.894	134.895	35.0106	31.3853	62.1668	134.89459Da/35.01065s	stable	stable	stable	0.000476874	0.000473326	0	2	6	90	12	56
135	134.895	negative	no	134.894	134.895	272.808	240.446	297.666	134.8946Da/272.80841s	stable	stable	stable	0.000150948	0.000166502	0	4	0	29	63	95
138	134.895	negative	no	134.895	134.895	211.285	191.709	226.78	134.89461Da/211.28507s	stable	stable	stable	0.000121737	0.000123016	0	3	0	15	59	35
139	134.895	negative	no	134.895	134.895	168.346	152.864	170.73	134.89458Da/168.34647s	stable	stable	stable	0.000173087	0.000137099	0	5	0	86	51	58
142	134.943	negative	no	134.943	134.943	32.3645	29.7789	33.4525	134.94321Da/32.36447	stable	stable	stable	0.000378772	0.000329557	4	2	0	96	2	49
143	134.988	negative	no	134.987	134.988	27.1805	22.7796	29.2787	134.98783Da/27.18051s	stable	stable	stable	0.000107265	0.000102409	0	0	0	2	79	76
144	135.03	negative	no	135.029	135.03	35.5769	33.0799	36.8943	[('l-threonic acid', 1.0), ('d-threonate', 1.0)]	stable	stable	stable	0.000340168	0.000296971	0	2	0	18	87	93
149	135.895	negative	no	135.894	135.895	33.9215	31.3853	57.9752	135.89467Da/33.92145s	stable	stable	stable	0.000456002	0.000379229	0	0	1	90	12	56
154	136.892	negative	no	136.891	136.892	34.1741	31.577	59.7479	136.89165Da/34.17413s	stable	stable	stable	0.000467349	0.000423372	0	1	4	90	12	56
157	136.892	negative	no	136.892	136.892	273.046	241.572	275.008	136.89166Da/273.04556s	stable	stable	stable	0.00011565	0.000107841	0	2	0	75	66	51
161	136.932	negative	no	136.932	136.932	26.9075	24.987	30.3945	136.93223Da/26.90748	stable	stable	stable	0.000144879	0.000173934	0	1	0	77	33	14
162	136.983	negative	no	136.983	136.984	28.0954	26.4482	29.8381	136.98347Da/28.09536	stable	stable	stable	0.000167313	0.000135254	0	2	0	59	38	2
164	137.024	negative	no	137.024	137.025	337.021	335.703	338.512	[('4-hydroxybenzoic acid', 1.0), ('salicylic acid', 1.0), ('3-hydroxybenzoic acid', 1.0), ('4-hydroxybenzoate', 1.0), ('3-hydroxybenzoate', 1.0), ('salicylate', 1.0)]	stable	stable	stable	0.000221473	0.000178017	0	5	0	64	21	56
165	137.024	negative	no	137.024	137.024	264.309	262.196	265.917	[('4-hydroxybenzoic acid', 1.0), ('salicylic acid', 1.0), ('3-hydroxybenzoic acid', 1.0), ('4-hydroxybenzoate', 1.0), ('3-hydroxybenzoate', 1.0), ('salicylate', 1.0)]	stable	stable	stable	9.64855e-05	0.000105744	0	2	0	40	98	92
166	137.024	negative	no	137.024	137.024	231.806	225.102	241.126	[('3,4-dihydroxybenzaldehyde', 1.0), ('gentisate aldehyde', 1.0), ('keratan sulfate ii (core 2-linked), degradation product 1', 1.0)]	stable	stable	stable	0.000189596	0.000205192	2	6	0	13	46	10
167	137.036	negative	no	137.035	137.036	67.8989	47.6279	83.7781	[('para-benzoquinone dioxime', 1.0), ('(e)-urocanic acid', 1.0), ('2-aminonicotinic acid', 1.0)]	Class 1	stable	stable	0.000809597	0.000644739	17	5	0	89	67	14
168	137.036	negative	no	137.035	137.036	158.24	151.964	160.763	[('nicotinamide N-oxide**', '0.590', 'M-H_meta', 'C6H6N2O2'), ('Urocanic acid**', '0.590', 'M-H_hmdb', 'C6H6N2O2'), ('Nicotinamide N-oxide**', '0.590', 'M-H_hmdb', 'C6H6N2O2'), ('5-Oxo-2(5H)-isoxazolepropanenitrile**', '0.590', 'M-H_hmdb', 'C6H6N2O2'), ('(E)-Urocanic acid**', '0.590', 'M-H_hmdb', 'C6H6N2O2'), ('2-Aminonicotinic acid**', '0.590', 'M-H_hmdb', 'C6H6N2O2'), ('Trans-urocanate**', '0.5…	stable	stable	stable	0.000157382	0.000126047	0	3	2	37	50	77
169	137.892	negative	no	137.891	137.892	34.4149	31.6793	63.0935	137.89168Da/34.41492s	Class 3	Class 3	Class 3	0.000110918	0.000118782	0	4	0	6	76	37
171	138.019	negative	no	138.019	138.02	60.4235	56.9619	63.7335	[('3-hydroxypicolinic acid', 1.0)]	stable	stable	stable	0.000819876	0.000628611	25	19	0	64	67	92
172	138.028	negative	no	138.027	138.028	337.036	335.686	338.512	138.02762Da/337.03558	stable	stable	stable	0.000140896	0.000145517	0	4	0	64	21	56
173	138.056	negative	no	138.055	138.056	145.953	92.02	178.738	[('3,4-dihydroxybenzylamine', 1.0), ('5-acetyl-2,4-dimethyloxazole', 1.0), ('ethyl 2-pyrrolecarboxylate', 1.0)]	Class 1	Class 1	Class 1	0.000149985	0.000147931	0	13	1	71	37	28
174	138.056	negative	no	138.056	138.056	238.322	235.969	240.611	[('5-acetyl-2,4-dimethyloxazole', 1.0), ('ethyl 2-pyrrolecarboxylate', 1.0), ('3,4-dihydroxybenzylamine', 1.0)]	stable	stable	stable	0.000389343	0.000314427	0	6	10	13	46	31
178	138.921	negative	no	138.921	138.921	30.8738	23.1217	31.6168	138.92083Da/30.87375s	Class 3	Class 3	Class 3	0.000573541	0.000468833	1	19	6	47	60	21
179	138.971	negative	no	138.97	138.971	34.9801	32.5774	36.3567	[('sulfoacetate', 1.0)]	Class 3	stable	stable	0.000954284	0.000710734	0	1	0	11	67	93
180	139.007	negative	no	139.007	139.007	41.9653	35.6146	44.7918	[('3-cyanopyridine**', '1.248', 'Cl_meta', 'C6H4N2')]	Class 2	Class 2	Class 3	0.000473523	0.000309758	2	2	25	50	9	63
184	140.913	negative	no	140.913	140.913	37.387	35.8689	39.3896	140.91265Da/37.387s	Class 2	Class 2	Class 2	0.000303288	0.000198811	0	7	0	20	53	73
185	140.918	negative	no	140.917	140.918	30.9098	22.7796	33.2515	140.91787Da/30.90978	stable	stable	stable	0.000646045	0.000536219	0	6	25	74	99	73
186	140.986	negative	no	140.986	140.986	36.6597	25.7264	38.5192	[('(2-hydroxyethoxy)sulfonic acid**', '0.482', 'M-H_hmdb', 'C2H6O5S1')]	Class 3	stable	stable	0.0111478	0.00322792	50	6	21	20	21	86
187	142.051	negative	no	142.051	142.051	130.845	107.707	139.787	[('N-vinylacetylglycine**', '0.671', 'M-H_chebi', 'C6H9N1O3'), ('2-Hydroxymethylclavam**', '0.671', 'M-H_chebi', 'C6H9N1O3'), ('6-oxopiperidine-2-carboxylic acid**', '0.671', 'M-H_chebi', 'C6H9N1O3')]	Class 1	Class 1	Class 1	0.000157836	0.000168254	2	3	0	40	73	69
188	142.91	negative	no	142.91	142.91	37.3267	36.0539	39.8561	142.90966Da/37.32665s	Class 2	Class 2	Class 2	0.000102052	0.000110676	0	6	0	76	91	27
193	144.045	negative	no	144.045	144.045	324.818	323.204	325.736	[('3-methyleneoxindole', 1.0), ('1h-indole-3-carboxaldehyde', 1.0), ('1h-indole-3-carboxaldehyde', 1.0)]	stable	stable	stable	0.00108819	0.000894985	1	11	0	89	46	32
194	144.045	negative	no	144.045	144.046	230.724	222.51	233.967	[('isoquinolin-2(1<i>H</i>)-one**', '0.468', 'M-H_meta', 'C9H7N1O1'), ('quinolin-7-ol**', '0.468', 'M-H_meta', 'C9H7N1O1'), ('quinolin-2-ol**', '0.468', 'M-H_meta', 'C9H7N1O1'), ('8-hydroxyquinoline**', '0.468', 'M-H_meta', 'C9H7N1O1'), ('quinolin-4-ol**', '0.468', 'M-H_meta', 'C9H7N1O1'), ('quinolin-6-ol**', '0.468', 'M-H_meta', 'C9H7N1O1'), ('quinolin-2(1H)-one**', '0.468', 'M-H_meta', 'C9H7N1O…	stable	stable	stable	0.00021715	0.00018685	0	6	0	37	13	74
195	144.067	negative	no	144.066	144.067	141.615	87.9289	166.83	[('(s)-5-amino-3-oxohexanoate', 1.0), ('4-acetamidobutanoate', 1.0), ('(s)-2-amino-6-oxohexanoate', 1.0), ('2-amino-5-oxohexanoate', 1.0)]	stable	stable	stable	0.000163571	0.000194118	0	4	6	60	6	95
197	144.87	negative	no	144.869	144.87	32.0894	29.5043	35.163	144.86953Da/32.08939s	stable	Class 3	stable	0.000230253	0.000232882	0	2	0	74	99	13
198	144.909	negative	no	144.909	144.909	35.3745	33.2461	36.3567	144.9092Da/35.37453s	Class 2	Class 2	Class 2	0.00198936	0.00095816	1	47	50	6	27	5
205	144.962	negative	no	144.962	144.962	403.971	402.896	404.623	[('p-dichlorobenzene**', '0.370', 'M-H_chebi', 'C6H4Cl2'), ('1,2-dichlorobenzene**', '0.370', 'M-H_chebi', 'C6H4Cl2'), ('m-dichlorobenzene**', '0.370', 'M-H_chebi', 'C6H4Cl2')]	stable	Class 1	Class 1	0.000414501	0.000291258	2	3	7	31	37	20
206	145.014	negative	no	145.014	145.014	49.3656	45.6781	56.1817	[('oxoglutaric acid', 1.0), ('3-oxoglutaric acid', 1.0), ('2-oxoglutarate', 1.0), ('methyloxaloacetate', 1.0)]	Class 2	Class 3	stable	0.000497338	0.000389504	3	2	0	20	1	10
207	145.051	negative	no	145.05	145.051	204.822	202.809	212.437	[('lmfa01020278', 1.0), ('(s)-2-aceto-2-hydroxybutanoic acid', 1.0), ('(s)-4-hydroxy-2-oxohexanoic acid', 1.0), ('adipic acid', 1.0), ('2,2-dimethylsuccinic acid', 1.0), ('2-methylglutaric acid', 1.0), ('methylglutaric acid', 1.0), ('2-methylglutaric acid', 1.0), ('2,2-dimethylsuccinic acid', 1.0), ('(s)-2-aceto-2-hydroxybutanoic acid', 1.0), ('2-dehydropantoate', 1.0), ('(r)-4-dehydropantoate', …	stable	stable	stable	0.000156596	0.000161338	2	2	0	15	51	32
208	145.062	negative	no	145.062	145.062	257.889	255.14	260.301	[('d-glutamine', 1.0)]	Class 3	Class 3	stable	0.000737372	0.000606632	0	1	0	83	8	97
212	146.046	negative	no	146.046	146.046	34.3189	31.6793	52.024	[('n-(carboxymethyl)-d-alanine', 1.0), ('glutamate', 1.0), ('l-4-hydroxyglutamate semialdehyde', 1.0), ('dl-glutamate', 1.0), ('3-(carboxymethylamino)propanoic acid', 1.0), ('n-lactoyl-glycine', 1.0)]	stable	stable	stable	0.00383975	0.00190744	0	10	0	11	89	63
214	146.867	negative	no	146.866	146.867	32.3081	29.5043	35.163	146.86657Da/32.30814s	Class 2	Class 2	Class 3	0.000161174	0.00015534	0	6	0	46	99	63
217	146.959	negative	no	146.959	146.959	403.97	402.908	404.792	146.95872Da/403.97037s	stable	stable	Class 3	0.000343885	0.000239251	2	4	9	31	37	20
218	146.961	negative	no	146.961	146.961	27.3721	21.9535	28.561	146.96116Da/27.37205	stable	stable	stable	0.000161296	0.000188527	0	0	0	77	33	40
219	147.03	negative	no	147.03	147.03	84.6618	76.5914	117.555	[('2-dehydro-3-deoxy-d-xylonate', 1.0), ('2-hydroxyglutarate', 1.0)]	Class 1	stable	stable	0.000481074	0.000460995	0	0	0	18	8	74
220	147.03	negative	no	147.03	147.03	58.2698	56.6798	61.577	[('2-hydroxyglutarate', 1.0), ('2-dehydro-3-deoxy-d-xylonate', 1.0), ('(s)-2-hydroxyglutarate', 1.0), ('d-erythro-3-methylmalate', 1.0)]	stable	Class 1	stable	0.000516778	0.000498486	0	5	3	37	81	74
224	148.95	negative	no	148.95	148.95	26.4307	23.8841	30.3945	148.94967Da/26.43074s	stable	stable	stable	0.000101493	9.3096e-05	0	1	0	0	56	75
225	148.956	negative	no	148.956	148.956	403.986	402.908	404.562	148.95575Da/403.9859	Class 3	Class 1	Class 2	0.000138694	0.000143124	0	6	0	46	86	20
226	149.009	negative	no	149.009	149.009	37.165	34.701	39.0543	[('2,3-dihydroxybutanedioic acid', 1.0), ('(s,s)-tartaric acid', 1.0)]	stable	Class 3	stable	0.000946842	0.000624235	0	6	0	18	1	5
227	149.045	negative	no	149.045	149.046	39.6931	37.1872	42.3055	[('2-deoxy-ribonic acid', 1.0), ('2-deoxypentonic acid', 1.0), ('arabinofuranose', 1.0), ('d-apiose', 1.0), ('beta-d-ribopyranose', 1.0), ('r-thmf', 1.0), ('apiose', 1.0), ('d-arabinofuranose', 1.0)]	Class 3	Class 3	stable	0.000176269	0.000147516	0	2	0	83	1	49
229	150.056	negative	no	150.056	150.056	294.159	293.01	295.276	[('2-(methylamino)benzoic acid', 1.0)]	Class 1	stable	stable	0.00115199	0.000738431	24	8	0	29	67	67
230	150.056	negative	no	150.056	150.056	212.119	158.022	248.609	[('n-methylanthranilate', 1.0), ('n-methyl-4-aminobenzoate', 1.0), ('2-(methylamino)benzoic acid', 1.0)]	Class 1	stable	stable	0.000691056	0.000619442	0	1	0	83	1	97
231	150.887	negative	no	150.886	150.887	31.0182	28.6976	32.1804	150.88661Da/31.01819	stable	stable	stable	0.000225504	0.000179989	1	5	0	68	60	27
232	150.947	negative	no	150.947	150.947	26.3406	23.8841	30.4436	150.9468Da/26.34061s	stable	stable	stable	0.000202005	0.000232766	0	4	0	7	82	18
233	150.954	negative	no	150.954	150.954	27.4797	26.8938	28.0873	150.95384Da/27.47967s	stable	stable	stable	0.000193863	0.000155329	1	9	1	23	96	96
234	150.983	negative	no	150.983	150.983	27.3468	25.4314	29.1277	150.98275Da/27.34675s	stable	stable	stable	0.000102242	8.72979e-05	0	1	0	58	79	76
235	151.007	negative	no	151.007	151.007	43.2296	39.891	60.7557	151.007Da/43.22955	stable	stable	stable	0.000640943	0.000458698	0	5	17	18	13	82
236	151.026	negative	no	151.026	151.026	74.8434	63.735	102.824	[('oxypurinol', 1.0), ('oxypurinol', 1.0)]	stable	Class 3	stable	0.000455166	0.00039647	0	4	0	11	67	68
237	151.04	negative	no	151.04	151.04	325.48	324.239	326.196	[('Methyl furfuracrylate**', '0.710', 'M-H_lipid', 'C8H8O3')]	stable	stable	stable	0.000422623	0.000373399	0	2	0	1	29	50
238	151.04	negative	no	151.04	151.04	282.947	255.405	284.29	[('6-methylsalicylic acid', 1.0), ('4-hydroxyphenylacetate', 1.0), ('(s)-mandelate', 1.0), ('phenoxyacetate', 1.0), ('4-methoxybenzoate', 1.0), ('6-methylsalicylate', 1.0), ('3-hydroxyphenylacetic acid', 1.0), ('2-hydroxyphenylacetate', 1.0), ('2-(hydroxymethyl)benzoic acid', 1.0), ('3-methylsalicylate', 1.0), ('4-methylsalicylate', 1.0), ('4-hydroxy-3-methylbenzoate', 1.0), ('p-hydroxyphenylacet…	stable	stable	stable	0.000315092	0.00021929	2	2	0	40	51	6
239	151.874	negative	no	151.874	151.874	34.3491	32.4639	35.0295	151.87394Da/34.3491s	Class 1	Class 1	Class 1	0.00017734	0.000137513	2	11	0	78	76	22
240	152.035	negative	no	152.035	152.035	179.579	177.579	187.552	[('3-hydroxyanthranilic acid', 1.0), ('3-aminosalicylic acid', 1.0), ('aminosalicylic acid', 1.0), ('mesalazine', 1.0), ('6-methoxy-pyridine-3-carboxylic acid', 1.0), ('(5r)-carbapen-2-em-3-carboxylate', 1.0), ('o-hydroxylaminobenzoate', 1.0), ('3-hydroxyanthranilate', 1.0), ('3-hydroxy-2-methylpyridine-5-carboxylate', 1.0), ('4-aminosalicylate', 1.0), ('5-aminosalicylate', 1.0), ('3-amino-5-hydr…	stable	stable	stable	0.000211246	0.000166978	0	5	0	40	44	80
241	152.099	negative	no	152.099	152.099	277.848	276.732	279.048	152.09873Da/277.84775s	Class 2	Class 1	Class 2	9.40891e-05	0.0001048	0	3	0	59	20	44
242	152.884	negative	no	152.883	152.884	31.0235	28.6976	32.1804	[('chloroform**', '1.146', 'Cl_meta', 'C1H1Cl3'), ('Chloroform**', '1.146', 'Cl_hmdb', 'C1H1Cl3')]	stable	stable	stable	0.000743814	0.000517807	0	28	26	68	60	44
243	152.917	negative	no	152.917	152.918	28.7114	27.2834	29.3101	152.9175Da/28.71144s	Class 3	Class 3	Class 2	0.00118416	0.000567878	1	6	25	87	63	12
244	152.978	negative	no	152.978	152.979	28.0678	25.5072	29.6822	[('divinyl sulfone**', '0.491', 'Cl_chebi', 'C4H6O2S1')]	stable	stable	stable	0.000148417	0.000133138	0	2	0	59	38	2
245	152.986	negative	no	152.986	152.987	38.0937	35.7312	45.1476	[('(2s)-3-sulfolactaldehyde', 1.0)]	Class 3	Class 1	stable	0.000180644	0.000180467	3	2	0	1	97	24
246	153.019	negative	no	153.019	153.019	193.671	191.382	201.054	[('gentisic acid', 1.0), ('2-pyrocatechuic acid', 1.0), ('protocatechuic acid', 1.0), ('2,6-dihydroxybenzoic acid', 1.0), ('3,5-dihydroxybenzoic acid', 1.0), ('2,4-dihydroxybenzoic acid', 1.0), ('2,3-dihydroxybenzoate', 1.0), ('3,4-dihydroxybenzoate', 1.0), ('2,5-dihydroxybenzoate', 1.0), ('2,6-dihydroxybenzoate', 1.0)]	stable	stable	stable	0.000193942	0.000173082	1	2	0	13	98	59
247	153.019	negative	no	153.019	153.019	262.657	237.254	271.714	[('2-pyrocatechuic acid', 1.0), ('protocatechuic acid', 1.0), ('3,5-dihydroxybenzoic acid', 1.0), ('2,4-dihydroxybenzoic acid', 1.0), ('gentisic acid', 1.0), ('2,6-dihydroxybenzoic acid', 1.0), ('2,3-dihydroxybenzoate', 1.0), ('3,4-dihydroxybenzoate', 1.0), ('2,5-dihydroxybenzoate', 1.0), ('2,6-dihydroxybenzoate', 1.0)]	stable	stable	stable	0.000203869	0.000180866	1	1	0	1	3	74
248	153.03	negative	no	153.03	153.031	49.0345	46.1041	58.2291	[('2-amino-4-nitrophenol', 1.0), ('2-amino-5-nitrophenol', 1.0), ('4-amino-2-nitrophenol', 1.0), ('imidazol-5-yl-pyruvate', 1.0)]	Class 1	Class 1	stable	0.00104054	0.000572072	1	22	1	11	40	27
249	153.869	negative	no	153.868	153.869	573.062	530.21	598.958	153.86853Da/573.06158s	stable	stable	stable	0.000232566	0.000198973	0	17	0	63	59	64
253	153.869	negative	no	153.868	153.869	34.4398	31.6929	83.9213	153.86853Da/34.43977s	stable	stable	stable	0.000182348	0.000210215	0	2	1	90	12	56
255	154.062	negative	no	154.061	154.062	30.971	28.6387	50.9122	[('bacimethrin**', '0.971', 'M-H_meta', 'C6H9N3O2'), ('L-Histidine**', '0.971', 'M-H_hmdb', 'C6H9N3O2'), ('L-2-Amino-3-(1-pyrazolyl)propanoic acid**', '0.971', 'M-H_hmdb', 'C6H9N3O2')]	Class 3	Class 3	stable	0.00227552	0.00117067	1	2	11	76	65	76
256	154.869	negative	no	154.868	154.869	34.0299	31.3853	35.0392	154.86859Da/34.02995s	stable	stable	stable	0.000148988	0.000174736	0	3	0	11	12	33
257	154.869	negative	no	154.868	154.869	559.815	512.304	585.889	154.86858Da/559.81512s	stable	stable	stable	0.000183772	0.000136977	2	6	0	20	54	21
258	154.881	negative	no	154.88	154.881	31.1147	29.1396	32.1804	154.88067Da/31.11466s	stable	Class 3	Class 3	0.000437292	0.000329966	0	9	17	98	84	99
259	154.898	negative	no	154.898	154.899	30.9867	25.6782	42.3464	154.89842Da/30.98674s	stable	stable	stable	0.000534557	0.000390088	0	0	2	77	56	92
260	154.919	negative	no	154.919	154.919	31.0524	28.6387	37.1592	154.91868Da/31.05244s	stable	stable	stable	0.000269487	0.000377878	0	6	0	7	41	50
261	154.928	negative	no	154.928	154.928	31.6054	29.1396	32.7689	154.92808Da/31.60541s	stable	stable	stable	0.000250862	0.000178744	3	8	0	96	21	39
263	154.974	negative	no	154.974	154.974	29.6405	27.1392	30.7486	[('phosphoglycolic acid**', '4.449', 'M-H_chebi', 'C2H5O6P1')]	Class 3	stable	stable	0.000227596	0.000174028	2	2	3	85	54	79
266	155.866	negative	no	155.865	155.866	34.2751	31.3853	62.1668	155.86556Da/34.27512s	stable	stable	stable	0.00034049	0.000373823	0	1	0	90	12	56
268	156.067	negative	no	156.066	156.067	219.231	217.598	224.083	[('3-methylcrotonylglycine', 1.0), ('tiglylglycine', 1.0)]	Class 1	stable	stable	0.000228821	0.000252373	0	0	0	11	1	97
269	156.866	negative	no	156.866	156.866	558.373	548.349	573.669	156.86559Da/558.37347s	stable	stable	stable	0.000414845	0.000378546	1	17	0	17	44	46
270	156.866	negative	no	156.865	156.866	34.1776	31.6793	35.163	156.8656Da/34.17757s	stable	stable	stable	0.000154753	0.00013952	0	1	0	6	76	33
271	156.866	negative	no	156.866	156.866	567.421	539.499	578.483	156.86564Da/567.42108s	stable	stable	stable	0.000231445	0.000172281	0	8	0	72	57	33
272	156.895	negative	no	156.894	156.896	30.9036	1.0481	55.8515	156.89538Da/30.90362s	stable	stable	Class 3	0.000333252	0.000321407	0	6	10	74	56	15
274	156.916	negative	no	156.915	156.916	31.038	28.6387	37.1592	156.91566Da/31.03804s	stable	stable	stable	0.000928163	0.000925394	0	7	4	0	41	50
275	156.925	negative	no	156.925	156.925	31.617	29.1396	33.3223	156.92509Da/31.61696s	stable	stable	stable	0.000289144	0.000288296	3	8	0	96	21	39
276	157.014	negative	no	157.014	157.014	85.6872	77.1539	93.6891	[('2-methylene-4-oxopentanedioic acid', 1.0), ('fumarylacetic acid', 1.0), ('3-hydroxy-cis,cis-muconic acid', 1.0), ('(z)-5-oxohex-2-enedioic acid', 1.0), ('2-maleylacetate', 1.0), ('2-hydroxymuconate', 1.0), ('gamma-oxalocrotonate', 1.0), ('3-hydroxy-cis,cis-muconate', 1.0), ('2-methylene-4-oxopentanedioic acid', 1.0), ('2-methylene-4-oxopentanedioic acid', 1.0)]	Class 2	Class 3	stable	0.000156535	0.000129092	0	4	0	14	71	31
277	157.037	negative	no	157.036	157.037	36.0596	33.6836	37.4301	[('(s)-allantoin', 1.0), ('allantoin', 1.0)]	Class 2	Class 2	stable	0.000551102	0.000544138	2	1	0	78	76	15
278	157.051	negative	no	157.05	157.051	217.218	215.261	239.534	[('2-isopropylmaleate', 1.0), ('(1s,4s)-4-hydroxy-3-oxocyclohexane-1-carboxylate', 1.0), ('succinylacetone', 1.0), ('isopropylmaleate', 1.0)]	stable	stable	stable	0.000200648	0.000186195	3	6	0	18	67	10
279	157.862	negative	no	157.862	157.863	33.9215	31.3853	40.2698	157.86247Da/33.92145s	stable	stable	stable	0.000123009	0.000114744	1	5	0	90	54	33
281	158.082	negative	no	158.081	158.082	184.438	176.799	204.176	[('5-acetamidopentanoate', 1.0), ('5-acetamidovalerate', 1.0)]	stable	stable	stable	0.000120752	0.000128949	1	2	0	4	72	32
282	158.082	negative	no	158.082	158.082	227.32	220.236	231.806	[('calystegin a3', 1.0), ('2-methylbutyrylglycine', 1.0), ('isovalerylglycine', 1.0), ('valerylglycine', 1.0)]	stable	stable	stable	0.000212393	0.00018362	0	3	0	18	1	10
285	158.979	negative	no	158.978	158.979	27.4717	21.4014	28.5632	158.97856Da/27.47167	stable	stable	stable	0.000139003	0.000135082	0	2	0	7	70	40
287	159.066	negative	no	159.066	159.066	254.24	250.665	259.011	[('3-methyl-adipic acid', 1.0), ('3-methyladipic acid', 1.0), ('2-methyladipic acid', 1.0), ('2-ethylglutaric acid', 1.0), ('2,2-dimethylglutaric acid', 1.0), ('ethyl methyl_succinate', 1.0), ('pimelate', 1.0), ('2-propylsuccinic acid', 1.0)]	stable	stable	stable	9.78623e-05	0.000120324	0	2	0	4	18	64
288	159.066	negative	no	159.066	159.066	284.464	282.971	285.699	[('3-methyl-adipic acid', 1.0), ('3-methyladipic acid', 1.0), ('2-methyladipic acid', 1.0), ('2-ethylglutaric acid', 1.0), ('2,2-dimethylglutaric acid', 1.0), ('2-propylsuccinic acid', 1.0)]	stable	stable	stable	0.000209967	0.000207221	0	1	0	64	98	42
289	159.066	negative	no	159.066	159.066	81.5954	71.9244	88.3877	[('3-methyladipic acid', 1.0), ('2-methyladipic acid', 1.0), ('2-ethylglutaric acid', 1.0), ('2,2-dimethylglutaric acid', 1.0), ('3-methyl-adipic acid', 1.0), ('pimelate', 1.0), ('2-propylsuccinic acid', 1.0)]	stable	stable	stable	0.000212657	0.000180826	1	2	0	14	67	59
293	159.979	negative	no	159.979	159.98	27.461	24.9916	28.5632	159.9793Da/27.46101s	stable	stable	stable	0.000105502	0.000105522	0	1	0	7	70	40
294	159.982	negative	no	159.981	159.982	27.4598	24.9916	28.5632	159.98165Da/27.45985s	stable	stable	stable	0.000132498	0.000100558	0	2	0	7	70	40
295	160.04	negative	no	160.04	160.04	273.752	272.637	305.4	[('2-indolecarboxylic acid', 1.0), ('3-hydroxy-1h-quinolin-4-one', 1.0)]	stable	stable	stable	0.000185043	0.000144067	0	5	0	40	80	10
296	160.061	negative	no	160.061	160.062	62.7222	35.7312	70.1315	[('aminoadipic acid', 1.0), ('acetylhomoserine', 1.0), ('o-acetyl-l-homoserine', 1.0)]	stable	Class 3	stable	0.000549251	0.000482727	1	1	0	11	65	10
300	160.842	negative	no	160.842	160.842	31.3929	1.52026	116.705	160.84204Da/31.39289s	stable	stable	stable	0.000113991	0.000117165	0	1	0	0	14	60
304	160.935	negative	no	160.935	160.935	512.339	480.44	535.359	[('phosphorus pentafluoride**', '0.413', 'Cl_chebi', 'F5P1')]	stable	stable	stable	0.000270229	0.00019656	0	15	4	91	54	17
306	160.976	negative	no	160.976	160.976	27.4606	24.9916	28.5632	160.97603Da/27.46064s	stable	stable	stable	0.000104592	0.000101281	0	1	0	7	70	40
307	160.982	negative	no	160.982	160.983	27.4659	24.9916	28.5632	160.98249Da/27.46593s	stable	stable	stable	0.000130041	0.000122843	0	0	0	7	70	40
308	161.024	negative	no	161.024	161.024	304.322	303.001	336.053	[('umbelliferone', 1.0)]	stable	stable	stable	0.000203315	0.000193691	2	1	0	18	21	69
312	161.987	negative	no	161.987	161.987	142.492	135.991	154.674	[('acesulfame', 1.0)]	stable	stable	stable	0.000317875	0.000289685	2	6	1	18	13	69
313	162.056	negative	no	162.055	162.056	246.546	218.35	271.987	[('4-oxo-1-(3-pyridyl)-1-butanone', 1.0), ('3-methyldioxyindole', 1.0), ('4-(3-pyridyl)-3-butenoic acid', 1.0)]	stable	stable	stable	0.000476195	0.000361883	0	5	3	64	98	28
314	162.839	negative	no	162.839	162.84	31.9827	2.17162	101.339	162.83908Da/31.98274s	stable	stable	stable	0.000175178	0.000155995	0	1	0	0	14	60
317	162.842	negative	no	162.842	162.842	40.427	22.3986	56.3947	162.84211Da/40.42696s	stable	stable	stable	0.000210647	0.000191782	1	7	0	52	75	90
321	162.983	negative	no	162.983	162.983	27.4519	24.9916	29.2787	162.98271Da/27.45188s	stable	stable	stable	0.000107629	0.00010774	0	2	0	2	79	76
322	163.061	negative	no	163.061	163.061	47.7966	46.9184	53.5416	[('digitoxic acid', 1.0), ('l-rhamnofuranose', 1.0), ('6-deoxy-d-talose', 1.0), ('beta-l-fucose', 1.0)]	Class 2	Class 1	Class 1	0.00116923	0.00066357	15	22	0	7	85	83
329	164.035	negative	no	164.035	164.035	169.493	165.249	178.756	[('4-pyridoxolactone', 1.0), ('5-pyridoxolactone', 1.0), ('noradrenochrome', 1.0)]	Class 1	Class 1	stable	0.000185369	0.0001282	2	1	0	69	73	2
331	164.839	negative	no	164.839	164.839	37.7992	32.4832	56.3947	164.83925Da/37.79924s	stable	stable	stable	0.000207254	0.000158577	0	5	0	52	99	29
333	164.927	negative	no	164.927	164.927	27.4648	21.4014	54.7715	164.92727Da/27.46481s	stable	stable	stable	0.000174855	0.000154965	2	4	0	77	33	88
335	164.935	negative	no	164.935	164.935	28.708	27.2834	29.8617	[('methylene bis(thiocyanate)**', '3.709', 'Cl_chebi', 'C3H2N2S2')]	stable	stable	stable	0.00103524	0.000718596	13	2	17	23	60	12
336	164.947	negative	no	164.947	164.948	29.5302	27.1392	30.505	164.94748Da/29.53016s	stable	stable	stable	0.00040106	0.000361954	0	3	0	76	41	39
337	164.957	negative	no	164.957	164.957	30.3509	28.101	31.0244	164.95683Da/30.3509	stable	stable	stable	0.000126949	0.000116315	2	8	0	16	83	78
338	165.019	negative	no	165.018	165.019	252.364	250.024	258.983	[('phthalic acid', 1.0), ('benzoquinoneacetic acid', 1.0), ('terephthalic acid', 1.0), ('3,4-methylenedioxybenzoic acid', 1.0), ('phthalate', 1.0), ('4-hydroxyphenylglyoxylate', 1.0), ('terephthalate', 1.0), ('3-formylsalicylic acid', 1.0), ('4-formylsalicylic acid', 1.0)]	stable	stable	stable	0.000153839	0.000170064	0	8	0	71	13	98
339	165.04	negative	no	165.04	165.041	34.5986	32.1807	35.8661	[('l-xylonate', 1.0), ('l-lyxonate', 1.0)]	stable	stable	stable	0.000201208	0.000174975	0	2	0	18	16	93
340	165.042	negative	no	165.042	165.042	167.021	160.378	177.046	[('3-methylxanthine', 1.0)]	stable	stable	stable	9.44994e-05	8.92499e-05	1	3	0	18	71	10
341	165.056	negative	no	165.055	165.056	299.76	298.21	317.665	[('3-(3-hydroxyphenyl)propanoic acid', 1.0), ('4-methoxyphenylacetic acid', 1.0), ('desaminotyrosine', 1.0), ('3-phenoxypropionic acid', 1.0), ('3-(2-hydroxyphenyl)propanoic acid', 1.0), ('3-methoxyphenylacetic acid', 1.0), ('3-(2-hydroxyphenyl)propanoate', 1.0), ('phloretate', 1.0)]	stable	stable	stable	0.000131688	0.000130243	0	2	0	64	89	75
345	165.837	negative	no	165.837	165.837	163.992	145.498	186.578	165.83734Da/163.9919s	stable	stable	stable	0.000109758	9.63144e-05	3	12	0	86	72	59
347	166.018	negative	no	166.018	166.018	45.313	41.9682	49.1699	[('homocysteinesulfinic acid', 1.0)]	Class 3	Class 3	stable	0.00015204	0.000154439	0	2	0	28	76	12
349	166.059	negative	no	166.059	166.059	299.953	299.493	300.163	166.05892Da/299.95294s	stable	stable	stable	0.000141595	0.000133522	1	3	1	29	93	79
351	166.833	negative	no	166.833	166.834	32.1251	30.0664	33.3311	166.83301Da/32.12514s	stable	stable	Class 1	0.000191396	0.000197045	0	4	6	80	81	73
354	166.924	negative	no	166.924	166.924	26.8964	21.4014	30.3945	166.92425Da/26.8964s	stable	stable	stable	0.000121873	0.000137222	0	0	0	77	33	88
355	167.021	negative	no	167.021	167.022	57.2626	41.969	63.0545	[('uric acid', 1.0), ('uric acid', 1.0)]	stable	stable	stable	0.000114231	0.000101953	0	3	2	18	21	95
356	167.035	negative	no	167.035	167.035	101.325	94.9595	105.547	[('2-hydroxy-6-oxoocta-2,4,7-trienoate', 1.0), ('1,2-dihydrophthalic acid', 1.0), ('homogentisate', 1.0), ('4-hydroxypheoxyacetate', 1.0), ('2,6-dihydroxyphenylacetate', 1.0), ('4-hydroxymandelate', 1.0), ('orsellinate', 1.0), ('4-hydroxymethylsalicylate', 1.0), ('3,4-dihydroxyphenylacetate', 1.0), ('vanillate', 1.0), ('orsellinic acid', 1.0), ('homogentisic acid', 1.0), ('vanillic acid', 1.0), (…	Class 2	Class 2	stable	0.000260749	0.000224893	0	0	0	40	19	31
361	168.018	negative	no	168.018	168.018	57.4149	47.1299	62.1712	[('(s)-ureidoglycine', 1.0)]	Class 2	Class 2	Class 3	0.000163147	0.000144725	2	2	0	50	6	11
362	168.024	negative	no	168.024	168.024	57.3303	46.6183	63.0545	168.0242Da/57.33028	stable	Class 3	stable	0.000280669	0.000224942	0	7	9	50	21	95
363	168.03	negative	no	168.03	168.03	183.519	175.843	191.18	[('l-2,3-dihydrodipicolinate', 1.0), ('2-furoylglycine', 1.0)]	stable	stable	stable	0.0059687	0.00243271	50	50	0	83	1	18
364	168.949	negative	no	168.949	168.949	25.6993	24.5205	43.2035	168.9489Da/25.69927s	stable	stable	stable	9.78199e-05	0.000127079	0	2	0	25	79	76
365	168.981	negative	no	168.981	168.981	33.6667	31.1732	34.7443	[('(s)-3-sulfonatolactate', 1.0), ('3-sulfolactate', 1.0)]	Class 3	Class 2	stable	0.00330807	0.00189362	0	6	0	29	76	63
367	169.033	negative	no	169.033	169.034	183.078	180.947	187.584	[('s-(2-furanylmethyl) propanethioate', 1.0)]	Class 2	Class 2	Class 3	0.00157316	0.000951097	26	27	0	11	27	10
372	170.082	negative	no	170.082	170.082	262.596	258.156	291.327	[('PAI-1-2**', '0.218', 'M-H_meta', 'C8H13N1O3')]	stable	Class 3	stable	0.000212953	0.000180385	3	0	0	13	71	10
374	170.884	negative	no	170.883	170.884	34.8892	29.0553	36.6931	170.8836Da/34.88923s	Class 2	Class 2	Class 1	0.000357966	0.00021609	0	14	0	87	75	0
377	171.012	negative	no	171.012	171.012	217.402	215.833	220.199	[('toluene-4-sulfonate', 1.0), ('p-toluenesulfonic acid', 1.0), ('toluene-4-sulfonate', 1.0), ('p-toluenesulfonic acid', 1.0)]	Class 2	Class 2	Class 3	0.000236244	0.000171527	5	5	0	11	97	58
378	171.041	negative	no	171.041	171.041	79.294	68.9728	84.5574	[('Hydantoin-5-propionic acid**', '0.411', 'M-H_hmdb', 'C6H8N2O4'), ('L-alpha-Amino-5-oxo-2(5H)-isoxazolepropanoic acid**', '0.411', 'M-H_hmdb', 'C6H8N2O4')]	Class 3	Class 3	stable	0.000292435	0.000234655	0	1	0	37	8	31
380	171.066	negative	no	171.066	171.066	266.639	265.016	282.024	[('2-octenedioic acid', 1.0), ('cis-4-octenedioic acid', 1.0), ('trans-3-octenedioic acid', 1.0), ('3-isopropenylpentanedioic acid', 1.0)]	stable	stable	stable	0.000217648	0.000155016	0	11	0	18	13	92
385	172.098	negative	no	172.097	172.098	242.986	211.263	277.443	[('isovalerylsarcosine', 1.0), ('swainsonine', 1.0)]	Class 2	Class 2	Class 1	9.84611e-05	0.000108837	0	10	1	24	77	7
388	172.843	negative	no	172.842	172.843	33.8147	30.857	34.6636	172.84252Da/33.81471s	stable	stable	stable	0.000133673	0.000121836	0	2	0	55	66	56
390	172.941	negative	no	172.941	172.941	557.526	514.114	589.142	[('1-bromo-4-fluorobenzene**', '2.564', 'M-H_chebi', 'C6H4Br1F1')]	stable	stable	stable	0.000191191	0.000148675	0	6	2	38	88	21
392	172.991	negative	no	172.991	172.991	220.303	218.464	225.32	[('phenol sulphate', 1.0), ('p-phenolsulfonic acid', 1.0)]	stable	Class 3	stable	0.000130953	0.000105371	3	0	0	18	8	49
393	173.009	negative	no	173.009	173.009	67.2063	43.4603	120.639	[('trans-aconitic acid', 1.0), ('trans-aconitate', 1.0)]	Class 3	Class 2	Class 3	9.44122e-05	7.8244e-05	2	3	0	18	65	52
396	173.082	negative	no	173.082	173.082	294.111	291.873	295.057	[('suberic acid', 1.0), ('ethyladipic acid', 1.0), ('2,4-dimethyladipic acid', 1.0), ('3-methylpimelic acid', 1.0), ('2-propylglutaric acid', 1.0)]	Class 1	stable	stable	0.000156525	0.000197109	0	3	0	93	18	64
397	173.101	negative	no	173.101	173.102	242.847	240.32	246.442	[('hexanethioic acid s-propyl ester', 1.0)]	Class 2	Class 2	Class 2	0.000171718	0.000175268	0	7	0	24	77	7
398	173.843	negative	no	173.842	173.843	33.8203	31.6929	34.6636	173.84251Da/33.82033s	Class 3	Class 3	Class 1	0.00117702	0.000918458	0	3	2	20	81	29
401	173.987	negative	no	173.986	173.987	49.8119	46.0181	56.2374	[('3-hydroxypyridine sulfate**', '0.766', 'M-H_chebi', 'C5H5N1O4S1')]	Class 2	Class 2	Class 2	0.00108079	0.000622064	5	9	0	50	20	71
402	173.995	negative	no	173.995	173.995	220.202	218.815	223.275	173.99466Da/220.20219s	Class 2	Class 3	stable	0.000105869	8.62212e-05	1	2	0	61	19	49
403	174.041	negative	no	174.04	174.041	50.754	38.825	59.4975	[('d-n-(carboxyacetyl)alanine', 1.0), ('n-acetyl-l-aspartic acid', 1.0), ('2-amino-3-oxoadipate', 1.0), ('n-acetyl-l-aspartate', 1.0)]	Class 2	Class 3	stable	0.000301104	0.000240244	0	3	0	20	78	94
405	174.085	negative	no	174.085	174.085	294.18	292.401	295.057	174.08521Da/294.1799s	Class 1	Class 1	stable	0.00030805	0.000225841	0	12	2	93	18	64
407	174.84	negative	no	174.839	174.84	33.7551	30.857	34.6636	174.83957Da/33.75511s	stable	stable	stable	0.000229083	0.00022111	0	3	0	55	66	56
409	174.887	negative	no	174.887	174.887	539.476	510.542	573.758	174.88711Da/539.47571s	stable	stable	stable	0.000126638	9.88938e-05	0	19	0	67	61	77
410	174.956	negative	no	174.956	174.957	27.4286	2.73795	84.2929	174.95611Da/27.42855s	stable	stable	stable	0.000227977	0.000234051	0	0	0	77	33	40
411	175.025	negative	no	175.025	175.025	85.9457	47.8189	94.33	[('1,2,3-propanetricarboxylic acid', 1.0), ('2-hydroxy-3-oxoadipate', 1.0), ('parapyruvate', 1.0), ('propane-1,2,3-tricarboxylate', 1.0)]	Class 3	stable	stable	0.000124038	0.000129035	0	2	0	27	98	10
412	175.061	negative	no	175.061	175.061	235.996	234.061	238.196	[('2,3-dimethyl-3-hydroxyglutaric acid', 1.0), ('2-isopropylmalic acid', 1.0), ('2-isopropylmalic acid', 1.0), ('2,3-dimethyl-3-hydroxyglutaric acid', 1.0), ('3-hydroxy-2-methylglutarate', 1.0), ('alpha-isopropylmalate', 1.0), ('2-propylmalate', 1.0)]	stable	stable	stable	0.00038876	0.000333942	0	1	0	37	8	32
414	175.84	negative	no	175.839	175.84	33.7335	31.0532	34.6636	175.83957Da/33.73354s	Class 1	stable	Class 1	0.00171357	0.00133925	0	7	3	66	81	13
416	175.959	negative	no	175.959	175.959	27.345	21.9535	28.3367	175.95933Da/27.34502s	stable	stable	stable	0.000129143	0.000113761	0	0	0	77	33	40
419	176.837	negative	no	176.836	176.837	33.7602	30.857	40.8523	176.83653Da/33.76019s	stable	stable	stable	0.000249001	0.000253085	1	2	0	55	66	56
421	176.901	negative	no	176.9	176.901	30.4193	28.101	31.5875	176.90063Da/30.41933s	stable	stable	stable	0.000345102	0.000293478	0	4	0	0	41	39
422	176.936	negative	no	176.936	176.936	32.629	30.5405	33.3311	[('diphosphate', 1.0)]	Class 2	Class 3	Class 3	0.00026113	0.00023676	16	10	0	91	2	13
423	176.952	negative	no	176.952	176.952	27.3433	24.9916	28.3367	[('3,5-dichlorocatechol**', '1.382', 'M-H_chebi', 'C6H4Cl2O2'), ('2,5-dichlorohydroquinone**', '1.382', 'M-H_chebi', 'C6H4Cl2O2'), ('2,6-dichlorohydroquinone**', '1.382', 'M-H_chebi', 'C6H4Cl2O2'), ('3,6-dichlorocatechol**', '1.382', 'M-H_chebi', 'C6H4Cl2O2'), ('3,4-dichlorocatechol**', '1.382', 'M-H_chebi', 'C6H4Cl2O2')]	stable	stable	stable	0.00018521	0.000184581	0	0	0	77	33	40
424	176.96	negative	no	176.96	176.96	27.1734	24.9916	28.3367	176.96013Da/27.17345	stable	stable	stable	0.00012051	0.000107437	0	0	0	77	33	40
425	176.962	negative	no	176.961	176.962	29.7974	28.5872	30.4436	176.96216Da/29.79737	Class 2	Class 2	Class 2	0.00030637	0.000198516	0	3	0	48	38	23
428	177.019	negative	no	177.019	177.019	258.467	224.755	259.884	[('aesculetin', 1.0), ('4,7-dihydroxy-2h-1-benzopyran-2-one', 1.0), ('caffeoquinone', 1.0)]	Class 1	Class 1	Class 1	0.000235973	0.000227318	3	6	31	64	78	66
430	177.04	negative	no	177.04	177.041	38.5381	36.9459	47.2312	[('l-gulonolactone', 1.0), ('3,6-anhydro-l-galactonate', 1.0)]	stable	Class 1	stable	0.000199917	0.000205689	0	5	0	34	27	44
433	178.051	negative	no	178.051	178.052	256.145	253.869	259.905	[('1-(4-methoxyphenyl)-2-nitroethylene', 1.0), ('hippuric acid', 1.0), ('hippurate', 1.0), ('n-acetylanthranilate', 1.0)]	stable	stable	stable	0.0002866	0.000322903	0	3	0	83	40	97
434	178.258	negative	no	178.257	178.259	27.4953	25.9635	57.8423	178.25809Da/27.49526s	stable	stable	stable	0.000168607	0.000123481	0	2	0	26	96	79
435	178.898	negative	no	178.898	178.898	30.414	28.101	31.2821	178.8977Da/30.41397s	stable	stable	stable	0.000757256	0.000728028	0	6	1	7	41	39
436	178.949	negative	no	178.949	178.949	27.33	21.9535	28.3367	178.949Da/27.33002s	stable	stable	stable	0.000134614	0.000150548	0	0	0	0	33	40
438	178.978	negative	no	178.978	178.978	27.342	1.03455	78.9959	178.97779Da/27.34199s	stable	stable	stable	0.000105631	0.000104208	0	0	0	2	79	76
439	179.054	negative	no	179.054	179.054	256.137	253.869	257.721	179.05433Da/256.13701	stable	stable	stable	0.000292162	0.000374788	0	3	0	83	8	97
440	179.056	negative	no	179.056	179.056	36.3051	33.6836	38.5192	[('d-galactofuranose', 1.0), ('3-deoxyarabinohexonic acid', 1.0)]	stable	stable	stable	0.00108353	0.00058372	3	10	0	83	67	82
441	179.057	negative	no	179.057	179.058	214.276	212.703	218.787	[('paraxanthine', 1.0), ('paraxanthine', 1.0)]	Class 3	stable	stable	0.00180455	0.0008693	2	3	0	28	71	54
445	179.882	negative	no	179.882	179.883	287.649	286.17	288.728	179.88248Da/287.64929s	Class 3	stable	stable	0.000145062	0.000131307	0	6	0	18	40	63
446	179.903	negative	no	179.903	179.903	59.27	57.1859	62.1412	179.90286Da/59.27004s	Class 2	Class 2	stable	0.00191434	0.00111805	0	4	5	10	24	11
447	179.981	negative	no	179.981	179.981	26.9775	25.4314	29.1277	[('5,6-dihydroxycytosine**', '4.524', 'M-2H_K_meta', 'C4H5N3O3'), ('N-methylisocyanurate**', '4.524', 'M-2H_K_meta', 'C4H5N3O3')]	stable	stable	stable	9.39965e-05	8.12937e-05	0	2	0	2	79	76
448	180.053	negative	no	180.053	180.053	152.721	146.603	162.897	[('8-hydroxy-7-methylguanine', 1.0)]	Class 2	Class 3	stable	0.000188985	0.000184641	3	5	0	61	21	90
450	180.913	negative	no	180.912	180.913	28.6968	27.2834	29.8621	180.91258Da/28.69683s	stable	stable	stable	0.00077416	0.000548351	9	4	0	46	28	12
451	180.973	negative	no	180.973	180.974	28.6173	21.9535	29.9902	180.97339Da/28.61732s	stable	stable	stable	0.000191486	0.000166698	0	2	0	48	38	2
453	180.982	negative	no	180.982	180.982	26.9306	25.6782	28.0918	[('(Z)-Methyl 3-(methylsulfinyl)-1-propenyl disulfide**', '2.149', 'M-H_hmdb', 'C5H103')]	Class 3	stable	Class 3	7.53874e-05	7.14043e-05	1	0	0	2	79	58
454	181.037	negative	no	181.037	181.037	152.846	136.853	166.495	[('3-methyluric acid', 1.0), ('1-methyluric acid', 1.0)]	stable	stable	stable	0.00041316	0.000322912	2	8	0	36	21	6
455	181.051	negative	no	181.05	181.051	222.271	216.486	251.174	[('3,4-dihydroxyhydrocinnamic acid', 1.0), ('homovanillic acid', 1.0), ('isohomovanillic acid', 1.0), ('3-(3-hydroxyphenyl)-3-hydroxypropanoic acid', 1.0), ('3-(2,3-dihydroxyphenyl)propanoate', 1.0), ('3,4-dihydroxyphenylpropanoate', 1.0), ('homovanillate', 1.0)]	stable	stable	stable	0.000240362	0.00023433	0	1	0	83	13	10
459	181.977	negative	no	181.976	181.977	28.5741	26.9961	30.0556	181.97661Da/28.57414s	stable	stable	stable	0.000162477	0.000136983	0	0	0	48	38	2
460	181.992	negative	no	181.992	181.992	206.159	203.989	214.19	[('saccharin', 1.0)]	stable	stable	stable	0.0022074	0.00112829	50	6	0	27	13	75
461	182.009	negative	no	182.009	182.01	323.146	322.694	324.014	[('5-nitrosalicylic acid**', '1.442', 'M-H_chebi', 'C7H5N1O5')]	Class 3	Class 2	Class 1	0.00498607	0.00198983	50	49	0	59	50	31
462	182.009	negative	no	182.009	182.01	294.76	294.175	295.929	[('5-nitrosalicylate', 1.0)]	Class 2	Class 2	stable	0.00502371	0.00180122	31	50	0	59	50	95
464	182.04	negative	no	182.04	182.04	155.865	142.699	165.374	[('1-(2-furanylmethylideneamino)-3-methylthiourea**', '1.781', 'M-H_chebi', 'C7H9N31')]	Class 3	Class 2	Class 3	0.00133821	0.000752161	0	15	0	5	16	17
465	182.046	negative	no	182.046	182.046	145.985	134.947	157.719	[('4-pyridoxic acid', 1.0), ('4-pyridoxate', 1.0), ('3-hydroxy-4-hydroxymethyl-2-methylpyridine-5-carboxylate', 1.0)]	stable	stable	stable	0.000224475	0.000249178	0	0	0	18	13	82
466	182.046	negative	no	182.046	182.046	246.68	244.901	247.934	[('3-carboxy-4-methoxy-n-methyl-2-pyridone', 1.0)]	Class 1	stable	stable	0.00420298	0.00200381	50	42	0	14	20	33
467	182.054	negative	no	182.054	182.054	222.162	221.028	223.891	[('azoxybacilin**', '4.445', 'M-2H_Na_chebi', 'C5H11N3O3')]	Class 3	stable	stable	0.00012699	0.000130261	0	3	0	83	1	10
468	182.082	negative	no	182.081	182.082	289.396	260.242	306.849	[('Epinephrine**', '0.368', 'M-H_hmdb', 'C9H13N1O3'), ('Normetanephrine**', '0.368', 'M-H_hmdb', 'C9H13N1O3'), ('Methylnoradrenaline**', '0.368', 'M-H_hmdb', 'C9H13N1O3'), ('Levonordefrin**', '0.368', 'M-H_hmdb', 'C9H13N1O3'), ('Ginkgotoxin**', '0.368', 'M-H_hmdb', 'C9H13N1O3'), ('3,4,5,6-Tetrahydrohippuric acid**', '0.368', 'M-H_hmdb', 'C9H13N1O3'), ('Oxidized-adrenal-ferredoxin**', '0.368', 'M-…	Class 3	Class 1	stable	0.00197638	0.00105021	0	5	1	27	29	50
471	182.946	negative	no	182.946	182.946	27.194	25.9635	28.1153	182.94601Da/27.19397s	stable	stable	stable	8.53074e-05	7.57553e-05	0	2	0	21	28	53
472	182.995	negative	no	182.995	182.995	206.01	204.157	209.721	182.99508Da/206.01024	Class 2	Class 3	stable	0.00216349	0.00125063	2	1	0	11	19	70
475	184.061	negative	no	184.06	184.062	132.724	113.638	147.635	[("2'-hydroxypyridoxol**", '0.334', 'M-H_meta', 'C8H11N1O4')]	stable	stable	stable	0.00024129	0.000161978	3	4	0	40	20	95
476	184.098	negative	no	184.097	184.098	295.327	278.483	296.497	[('ecgonine', 1.0), ('n-isovaleryl-l-homoserine lactone', 1.0)]	stable	stable	stable	0.000379867	0.000398685	0	2	0	83	98	74
477	184.955	negative	no	184.954	184.955	59.2683	57.1859	62.1412	[('methyl 2,5-dichlorobenzoate**', '4.952', 'M-H-H2O_chebi', 'C8H6Cl2O2')]	Class 2	Class 2	Class 2	0.000848006	0.000627401	2	19	4	41	12	31
478	185.013	negative	no	185.012	185.013	50.0882	46.4625	58.2355	185.01254Da/50.08824s	Class 3	Class 2	Class 2	0.000217751	0.00019067	1	6	17	12	9	90
479	185.028	negative	no	185.028	185.028	268.282	266.047	280.264	[('L-penicillamine**', '3.041', 'Cl_meta', 'C5H11N1O2S1'), ('D-penicillamine**', '3.041', 'Cl_meta', 'C5H11N1O2S1'), ('D-methionine**', '3.041', 'Cl_meta', 'C5H11N1O2S1'), ('L-methionine**', '3.041', 'Cl_meta', 'C5H11N1O2S1'), ('1-(methylsulfanyl)-4-<i>aci</i>-nitrobutane**', '3.041', 'Cl_meta', 'C5H11N1O2S1'), ('<i>S</i>-ethyl-L-cysteine**', '3.041', 'Cl_meta', 'C5H11N1O2S1')]	Class 3	stable	stable	0.000901798	0.0005659	21	10	0	67	97	77
481	185.082	negative	no	185.082	185.082	301.853	300.089	313.846	[('cis-2-carboxycyclohexyl-acetic acid', 1.0), ('5-(2-methylpropyl)tetrahydro-2-oxo-3-furancarboxylic acid', 1.0), ('5-butyltetrahydro-2-oxo-3-furancarboxylic acid', 1.0)]	stable	stable	stable	0.000192852	0.000157993	0	2	0	18	13	10
483	186.031	negative	no	186.031	186.031	268.045	266.315	269.302	[('1H-[1,2,4]oxadiazolo[4,3-a]quinoxalin-1-one**', '2.010', 'M-H_chebi', 'C9H5N3O2')]	Class 1	Class 3	Class 3	0.000676434	0.000529497	5	10	0	67	97	21
485	186.114	negative	no	186.113	186.114	281.293	279.119	282.682	[('polyethylene glycol', 1.0), ('n-heptanoylglycine', 1.0), ('8-amino-7-oxononanoate', 1.0), ('(e)-2-butenyl-4-methyl-threonine', 1.0), ('lmfa01060168', 1.0)]	Class 2	Class 2	Class 2	0.000138669	0.000108604	0	6	0	24	77	7
486	186.93	negative	no	186.929	186.93	29.4702	27.1392	30.7486	186.92957Da/29.47023s	stable	stable	stable	0.000599136	0.000542001	0	1	0	28	41	39
487	187.007	negative	no	187.007	187.008	287.648	286.17	289.486	[('4-sulfobenzyl alcohol', 1.0), ('p-cresol sulfate', 1.0), ('benzyl sulfate', 1.0)]	stable	stable	stable	0.000114245	0.000119142	0	1	0	18	1	49
488	187.061	negative	no	187.061	187.061	211.791	209.316	224.506	[('2-oxosuberate', 1.0), ('tetrahydro-2,5-furan-diacetic acid', 1.0)]	stable	stable	stable	8.78765e-05	9.0755e-05	0	0	0	4	46	64
490	187.098	negative	no	187.097	187.098	326.641	324.989	327.962	[('azelaic acid', 1.0), ('(+/-)-methyl 5-acetoxyhexanoate', 1.0), ('butyl ethyl malonate', 1.0), ('2,4-dimethylpimelic acid', 1.0), ('3-methylsuberic acid', 1.0), ('eucommiol', 1.0), ('nonate', 1.0)]	stable	stable	stable	0.000128338	0.000107971	0	2	0	93	18	64
492	187.109	negative	no	187.109	187.109	182.22	173.73	186.361	[('glycyl-leucine', 1.0), ('glycylleucine', 1.0), ('glycyl-isoleucine', 1.0)]	stable	stable	stable	0.000341599	0.000424024	0	6	18	13	14	11
493	187.117	negative	no	187.117	187.117	281.371	279.241	282.682	187.11689Da/281.37086	Class 2	Class 2	Class 2	0.000150292	0.000144641	0	6	0	24	77	7
498	188.01	negative	no	188.01	188.01	287.644	285.837	288.884	[('taurocyamine**', '2.071', 'M-2H_Na_chebi', 'C3H9N3O3S1'), ('taurocyamine**', '2.071', 'M-2H_Na_chebi', 'C3H9N3O3S1'), ('Taurocyamine**', '4.836', 'M-2H_Na_hmdb', 'C3H9N3O3S1'), ('Demethylphosphinothricin**', '3.915', 'M-2H_Na_chebi', 'C4H10N1O4P1'), ('[(S)-1-acetamidoethyl]phosphonic acid**', '3.915', 'M-2H_Na_chebi', 'C4H10N1O4P1')]	stable	stable	stable	9.7283e-05	8.7443e-05	0	1	0	18	1	49
499	188.035	negative	no	188.035	188.035	230.84	228.363	233.363	[('<i>N</i>-acetylisatin**', '0.068', 'M-H_meta', 'C10H7N1O3'), ('Kynurenic acid**', '0.068', 'M-H_hmdb', 'C10H7N1O3'), ('1-Nitronaphthalene-5,6-oxide**', '0.068', 'M-H_hmdb', 'C10H7N1O3'), ('1-Nitronaphthalene-7,8-oxide**', '0.068', 'M-H_hmdb', 'C10H7N1O3')]	stable	stable	stable	0.000156606	0.000132083	0	3	0	83	13	74
500	188.056	negative	no	188.056	188.056	75.8861	67.2232	80.0129	[('n-acetylglutamic acid', 1.0), ('l-2-amino-6-oxoheptanedioate', 1.0), ('n-acetyl-l-glutamate', 1.0), ('1-isothiocyanato-6-(methylthio)hexane', 1.0)]	Class 3	Class 3	stable	0.000453978	0.000404758	0	1	0	27	65	74
501	188.101	negative	no	188.101	188.101	326.643	325.471	327.962	188.10087Da/326.64255s	Class 1	stable	stable	0.000134508	0.000107283	0	2	0	93	18	64
503	188.897	negative	no	188.897	188.898	37.3023	35.4154	39.117	[('iodoethene**', '0.078', 'Cl_chebi', 'C2H3I1')]	Class 2	Class 2	Class 2	0.000936163	0.000848807	0	50	24	31	58	68
505	188.952	negative	no	188.951	188.952	403.979	402.887	445.561	[('2,4-dichlorobenzoic acid**', '0.705', 'M-H_chebi', 'C7H4Cl2O2'), ('2,6-dichlorobenzoic acid**', '0.705', 'M-H_chebi', 'C7H4Cl2O2'), ('3,4-dichlorobenzoic acid**', '0.705', 'M-H_chebi', 'C7H4Cl2O2'), ('2,5-dichlorobenzoic acid**', '0.705', 'M-H_chebi', 'C7H4Cl2O2')]	stable	stable	Class 1	0.000390586	0.0002902	1	3	2	31	37	20
506	188.986	negative	no	188.986	188.986	198.044	196.206	204.648	[('3-sulfocatechol', 1.0), ('4-sulfocatechol', 1.0), ('catechol sulfate', 1.0)]	stable	Class 3	stable	0.000224222	0.000206379	3	4	0	83	8	49
507	188.986	negative	no	188.986	188.986	103.929	79.6552	108.431	[('catechol sulfate', 1.0), ('3-sulfocatechol', 1.0), ('4-sulfocatechol', 1.0)]	Class 2	Class 2	stable	0.000118184	0.000138799	0	3	0	11	19	31
508	189.003	negative	no	189.003	189.003	287.643	285.837	288.884	189.00274Da/287.64297	stable	stable	stable	9.6394e-05	9.49857e-05	1	1	0	18	1	49
514	189.955	negative	no	189.955	189.955	403.97	402.908	404.573	189.95486Da/403.97037	stable	stable	Class 2	0.000346353	0.000274443	2	7	25	31	37	20
515	189.99	negative	no	189.989	189.99	197.216	196.491	201.714	189.98964Da/197.21645	Class 2	Class 3	stable	0.000276444	0.000253704	0	0	0	11	19	43
516	190.051	negative	no	190.051	190.051	279.837	278.008	280.888	[('xi-2,3-dihydro-2-oxo-1h-indole-3-acetic acid', 1.0), ('5-phenyl-1,3-oxazinane-2,4-dione', 1.0)]	stable	stable	stable	0.00025641	0.000184009	0	4	0	13	98	92
518	190.894	negative	no	190.894	190.895	37.3072	36.0646	39.117	190.89438Da/37.30722s	Class 2	Class 2	Class 2	0.000922951	0.000597133	0	3	0	8	91	73
519	190.897	negative	no	190.897	190.897	245.006	242.985	249.371	190.89705Da/245.00597s	stable	stable	stable	0.00172869	0.00105057	1	47	50	57	60	69
523	190.949	negative	no	190.948	190.949	403.972	402.887	441.967	190.94861Da/403.97246s	stable	stable	Class 1	0.000333719	0.000261265	1	4	4	31	37	20
525	191.02	negative	no	191.019	191.02	58.3821	34.6114	63.6719	[('citric acid', 1.0), ('(1r,2r)-isocitric acid', 1.0), ('(2s,3r)-2,3-dihydroxy-5-oxohexanedioate', 1.0), ('diketogulonic acid', 1.0)]	stable	stable	stable	0.00262573	0.00138395	1	10	0	37	19	11
526	191.056	negative	no	191.055	191.056	38.7882	32.4367	40.7829	[('2-epi-valiolone', 1.0), ('quinic acid', 1.0)]	stable	stable	stable	0.00232933	0.00127463	46	50	0	5	67	15
527	191.108	negative	no	191.108	191.108	364.489	363.539	365.293	[('lmfa01030464', 1.0), ('ethyl 4-phenylbutanoate', 1.0), ('11,12,13-trinor-1,3,5-bisabolatrien-10-oic acid', 1.0), ('3-phenylpropyl propanoate', 1.0)]	stable	stable	stable	0.000572722	0.000504413	0	19	45	16	80	5
529	191.952	negative	no	191.952	191.952	403.981	402.908	404.573	191.95189Da/403.98071s	stable	stable	Class 3	0.000157769	0.000136011	1	2	0	31	37	20
530	192.023	negative	no	192.023	192.023	58.9682	43.0378	63.6719	[('1-Nitrosonaphthalene**', '3.680', 'Cl_chebi', 'C10H7N1O1')]	stable	Class 3	stable	0.00250357	0.00153896	3	8	0	37	65	11
531	192.059	negative	no	192.059	192.06	38.8591	36.6617	40.6782	192.05926Da/38.85906s	stable	Class 2	Class 3	0.00354827	0.00148644	22	50	0	29	41	63
532	192.946	negative	no	192.946	192.946	403.97	402.889	404.575	192.94562Da/403.97037	stable	Class 3	Class 3	0.000446578	0.000315549	2	5	7	31	37	20
534	193.024	negative	no	193.023	193.024	59.0552	57.1859	62.1995	[('4-(3-fluorophenyl)-2-thiazolamine**', '0.392', 'M-H_chebi', 'C9H72S1')]	Class 2	Class 2	stable	0.0030967	0.00164589	0	22	2	37	24	11
535	193.035	negative	no	193.035	193.035	33.9174	31.1732	35.2868	[('d-glucuronic acid', 1.0), ('5-dehydro-l-gluconate', 1.0), ('iduronic acid', 1.0), ('5-keto-d-gluconate', 1.0)]	stable	stable	stable	0.000245275	0.000243598	0	1	0	64	13	93
537	193.087	negative	no	193.087	193.089	357.152	356.053	387.443	[('zingerone', 1.0), ('3-hydroxyphenyl-valeric acid', 1.0)]	Class 3	stable	stable	0.000364626	0.000267029	1	7	1	5	89	75
538	193.816	negative	no	193.815	193.816	33.166	6.52898	54.2977	193.81552Da/33.166s	stable	stable	stable	0.000272399	0.000181317	0	1	0	7	62	93
540	194.046	negative	no	194.046	194.046	211.218	195.578	217.613	[('salicyluric acid', 1.0), ('dopaquinone', 1.0), ('l-dopaquinone', 1.0), ('3-hydroxyhippuric acid', 1.0)]	Class 3	Class 3	stable	0.000996118	0.000648671	0	1	0	83	8	97
541	194.046	negative	no	194.046	194.046	294.153	292.506	295.276	[('dopaquinone', 1.0), ('salicyluric acid', 1.0), ('l-dopaquinone', 1.0), ('4-hydroxyhippuric acid', 1.0)]	stable	stable	stable	0.00118523	0.000814739	36	7	0	29	1	67
542	194.046	negative	no	194.045	194.046	248.999	246.684	250.863	[('n-acetyl-5-aminosalicylic acid', 1.0), ('6-hydroxy-3-succinoylpyridine', 1.0)]	Class 1	Class 1	Class 1	0.0140497	0.00370919	42	50	49	75	59	33
547	194.927	negative	no	194.927	194.928	33.8744	30.857	37.2303	194.9274Da/33.87438s	stable	stable	stable	0.00103026	0.000741783	0	22	38	65	41	95
549	194.997	negative	no	194.996	194.997	40.3008	30.8615	42.3944	[('3-methyl-4-(sulfooxy)but-2-enoic acid**', '0.526', 'M-H_hmdb', 'C5H8O6S1'), ('(2Z)-2-[(sulfooxy)methyl]but-2-enoic acid**', '0.526', 'M-H_hmdb', 'C5H8O6S1'), ('2-methyl-4-(sulfooxy)but-2-enoic acid**', '0.526', 'M-H_hmdb', 'C5H8O6S1')]	Class 3	Class 2	Class 2	0.000258244	0.000228485	24	4	0	16	92	29
550	195.049	negative	no	195.049	195.05	212.221	195.905	249.207	195.04925Da/212.22096	Class 2	Class 2	stable	0.00120135	0.000748671	0	6	0	11	16	97
551	195.049	negative	no	195.049	195.049	294.153	293.054	294.882	195.04923Da/294.15286	Class 2	Class 3	stable	0.000945054	0.000617987	2	5	0	29	67	67
552	195.051	negative	no	195.051	195.051	34.4573	32.1807	35.8225	[('gulonic acid', 1.0), ('l-galactonate', 1.0)]	Class 3	Class 3	stable	0.00475562	0.00210964	0	4	1	5	8	54
553	195.052	negative	no	195.052	195.053	204.243	183.751	211.838	[('3,7-dimethyluric acid', 1.0), ('1,3-dimethyluric acid', 1.0)]	stable	Class 3	stable	0.00156938	0.000652993	3	48	0	18	21	10
557	195.082	negative	no	195.082	195.082	278.287	277.35	279.102	[('trans-4-hydroxystilbene', 1.0), ('cis-stilbene oxide', 1.0), ('(e)-4-stilbenol', 1.0)]	Class 2	Class 2	Class 2	0.000125004	0.00011351	0	3	0	81	73	98
565	195.811	negative	no	195.811	195.811	568.468	554.17	599.529	195.811Da/568.4679s	stable	stable	stable	0.000105255	0.00010763	0	3	0	84	91	47
570	195.992	negative	no	195.991	195.992	32.6016	31.3858	33.2152	195.9919Da/32.60158s	stable	Class 3	Class 2	0.000687103	0.000632768	0	6	1	89	71	57
572	196.056	negative	no	196.056	196.056	204.38	202.519	209.904	196.05571Da/204.37997	Class 2	Class 2	stable	0.00123691	0.000675925	0	3	0	11	16	75
575	196.089	negative	no	196.089	196.089	277.875	277.045	279.048	[('2-amino-3-methyl-9h-pyrido[2,3-b]indole', 1.0), ('trp-p-2', 1.0), ('3-amino-1-methyl-5h-pyrido[4,3-b]indole', 1.0)]	Class 2	stable	Class 3	0.00014862	0.000127779	2	2	1	75	50	60
576	196.811	negative	no	196.811	196.811	34.367	6.52706	124.342	196.81122Da/34.367s	stable	stable	stable	0.000212393	0.00017939	1	2	0	1	10	95
577	196.944	negative	no	196.944	196.944	25.2566	24.6254	44.8851	196.94398Da/25.25664s	stable	stable	stable	0.000110775	0.000106766	0	4	0	25	79	76
579	197.046	negative	no	197.045	197.046	152.386	146.766	163.485	[('Syringic acid**', '0.037', 'M-H_hmdb', 'C9H10O5'), ('Ethyl gallate**', '0.037', 'M-H_hmdb', 'C9H10O5'), ('2-(2,4,5-trihydroxyphenyl)propanoic acid**', '0.037', 'M-H_hmdb', 'C9H10O5'), ('3-(3,4,5-trihydroxyphenyl)propanoic acid**', '0.037', 'M-H_hmdb', 'C9H10O5'), ('3-(2,4-dihydroxyphenyl)-3-hydroxypropanoic acid**', '0.037', 'M-H_hmdb', 'C9H10O5'), ('3-(2,4,5-trihydroxyphenyl)propanoic acid**'…	Class 1	Class 1	stable	0.000137677	0.000155593	1	1	0	14	13	31
580	197.068	negative	no	197.068	197.068	165.313	162.299	169.869	[('6-amino-5[n-methylformylamino]-1-methyluracil', 1.0), ('5-acetylamino-6-amino-3-methyluracil', 1.0)]	stable	stable	stable	0.000861561	0.000523144	9	34	0	18	13	28
582	197.068	negative	no	197.068	197.068	103.091	101.95	104.863	[('5-acetylamino-6-amino-3-methyluracil', 1.0), ('6-amino-5[n-methylformylamino]-1-methyluracil', 1.0)]	stable	stable	stable	7.55071e-05	8.2641e-05	0	6	3	61	14	87
583	197.068	negative	no	197.068	197.068	56.2019	47.2519	82.1908	[('5-acetylamino-6-amino-3-methyluracil', 1.0), ('cymoxanil', 1.0)]	stable	stable	stable	0.000912392	0.000773059	2	24	0	18	21	82
584	197.082	negative	no	197.082	197.082	313.803	311.921	314.965	[('1,2-dihydroxymint lactone', 1.0), ('cis-2,3-dihydroxy-2,3-dihydro-p-cumate', 1.0), ('2,3-methylene suberic acid', 1.0)]	stable	stable	stable	0.000114975	0.000118322	0	4	0	18	13	10
585	197.092	negative	no	197.091	197.092	277.716	249.123	278.687	[('Metharbital**', '3.705', 'M-H_chebi', 'C9H14N2O3')]	Class 2	Class 1	Class 2	0.00288595	0.00148711	1	2	3	57	36	69
591	197.808	negative	no	197.808	197.808	569.21	552.482	599.529	197.80801Da/569.21014s	stable	stable	stable	8.49173e-05	8.50985e-05	0	1	0	84	9	47
593	198.113	negative	no	198.113	198.114	350.244	349.441	350.742	[('<i>N</i>-hexanoyl-D,L-homoserine lactone**', '0.389', 'M-H_meta', 'C10H17N1O3'), ('Ecgonine methyl ester**', '0.389', 'M-H_hmdb', 'C10H17N1O3'), ('Neotussilagine**', '0.389', 'M-H_hmdb', 'C10H17N1O3'), ('2-octenoylglycine**', '0.389', 'M-H_hmdb', 'C10H17N1O3'), ('3-octenoylglycine**', '0.389', 'M-H_hmdb', 'C10H17N1O3'), ('4-octenoylglycine**', '0.389', 'M-H_hmdb', 'C10H17N1O3'), ('5-octenoylgl…	Class 3	Class 3	stable	0.000144242	0.000145016	1	1	0	5	1	82
594	198.808	negative	no	198.808	198.808	34.2378	6.42113	112.933	198.80822Da/34.2378s	stable	stable	stable	0.000213996	0.000169928	3	3	0	33	82	10
598	199.043	negative	no	199.043	199.044	315.884	314.291	316.771	199.04346Da/315.88393s	Class 2	Class 3	Class 3	0.00385732	0.00204198	50	33	0	5	43	61
599	199.098	negative	no	199.097	199.098	341.99	317.944	345.035	[('cis-4-Decenedioic acid**', '0.165', 'M-H_hmdb', 'C10H16O4'), ('cis-5-Decenedioic acid**', '0.165', 'M-H_hmdb', 'C10H16O4'), ('5-Pentyltetrahydro-2-oxo-3-furancarboxylic acid**', '0.165', 'M-H_hmdb', 'C10H16O4'), ('alpha-Carboxy-delta-nonalactone**', '0.165', 'M-H_hmdb', 'C10H16O4'), ('(±)-Camphoric acid**', '0.165', 'M-H_hmdb', 'C10H16O4'), ("(1R,2R,3S,1'R)-Nepetalinic acid**", '0.165', 'M-H_h…	stable	stable	stable	0.000150962	0.000132113	0	1	0	18	34	72
605	199.805	negative	no	199.805	199.805	20.9766	6.25131	43.8075	199.80507Da/20.97663s	stable	stable	stable	0.000138988	0.0001214	1	1	0	62	88	96
607	199.805	negative	no	199.805	199.805	536.207	522.959	551.859	199.80505Da/536.20721s	stable	stable	stable	9.09221e-05	9.16253e-05	0	1	0	49	22	52
609	199.805	negative	no	199.805	199.805	568.869	552.422	599.529	199.80502Da/568.8692s	stable	stable	stable	0.000187549	0.000149499	0	2	1	84	69	47
611	200.093	negative	no	200.092	200.093	199.421	178.573	200.197	[('l-dihydroanticapsin', 1.0)]	stable	stable	stable	0.000134991	0.000135909	0	1	0	24	18	64
612	200.129	negative	no	200.129	200.129	312.914	311.188	314.111	[('n-(5-methyl-3-oxohexyl)alanine', 1.0)]	Class 2	Class 2	Class 2	0.000345946	0.00022837	0	27	11	93	77	7
613	200.129	negative	no	200.129	200.129	368.635	367.305	382.775	[('n-acetylaminooctanoic acid', 1.0)]	stable	stable	stable	0.000123433	0.000141626	0	0	0	61	1	74
614	200.805	negative	no	200.805	200.806	34.5852	32.4639	92.6227	200.80528Da/34.58519s	stable	stable	stable	0.000177728	0.000162509	1	1	0	91	53	29
615	200.859	negative	no	200.859	200.859	573.671	548.649	599.529	200.85886Da/573.67114	stable	stable	stable	0.000106886	0.000126688	0	3	0	33	94	34
618	201.019	negative	no	201.019	201.019	363.814	363.158	364.256	[('bergaptol', 1.0), ('xanthotoxol', 1.0), ('2-carboxy-1,4-naphthoquinone', 1.0)]	Class 3	Class 3	stable	0.000219511	0.000198626	2	0	0	18	21	28
619	201.076	negative	no	201.075	201.077	250.703	248.585	254.911	[('<i>N</i>-3-fumaramoyl-L-2,3-diaminopropanoate**', '0.669', 'M-H_meta', 'C7H11N3O4')]	stable	stable	stable	9.37144e-05	9.33827e-05	0	2	0	93	18	64
620	201.113	negative	no	201.113	201.113	355.673	352.85	356.821	[('9,10-dihydroxy-2-decenoic acid**', '0.327', 'M-H_lipid', 'C10H18O4'), ('Sebacic acid**', '0.327', 'M-H_lipid', 'C10H18O4'), ('2,6-Dimethyl-1,8-octanedioic acid**', '0.327', 'M-H_lipid', 'C10H18O4')]	stable	stable	stable	0.000137727	0.000108276	0	7	0	4	18	64
621	201.113	negative	no	201.112	201.113	283.166	281.045	317.476	[('sebacic acid', 1.0), ('2-ethylsuberic acid', 1.0), ('3-methylazelaic acid', 1.0), ('diethyl adipate', 1.0), ('dimethyl suberate', 1.0), ('lmfa01170129', 1.0), ('9,10-dihydroxy-2-decenoic acid', 1.0)]	stable	stable	stable	0.000220242	0.000198024	3	5	0	83	13	10
624	201.802	negative	no	201.802	201.802	33.7551	6.14885	65.7008	201.8021Da/33.75511s	stable	stable	stable	0.000116996	9.70771e-05	0	2	0	77	66	50
625	202.002	negative	no	202.002	202.002	33.8275	31.3853	34.6636	202.00192Da/33.82753	Class 2	Class 2	Class 2	0.000590463	0.000359585	3	6	0	78	54	73
626	202.072	negative	no	202.072	202.072	60.9577	51.3577	66.1211	[('2-acetamidoglucal**', '0.116', 'M-H_meta', 'C8H13N1O5'), ('N-acetyl-L-2-aminoadipate(2-)**', '0.116', 'M-H_hmdb', 'C8H13N1O5')]	stable	stable	stable	0.000278827	0.000248221	2	15	0	13	6	26
627	202.108	negative	no	202.107	202.109	218.467	183.857	221.154	[('n-lactoyl-leucine', 1.0)]	Class 2	Class 1	Class 2	0.000134846	0.00013342	0	3	0	93	18	7
628	202.117	negative	no	202.117	202.117	356.131	355.159	356.781	202.11667Da/356.13077s	Class 1	Class 1	stable	9.71635e-05	0.000108729	0	2	0	80	5	64
630	202.903	negative	no	202.903	202.904	37.2715	36.0646	38.541	202.90337Da/37.27145s	Class 2	Class 2	Class 2	0.000371379	0.000222907	2	1	0	79	91	73
631	202.998	negative	no	202.998	202.999	33.8267	31.3853	34.7443	[('uric acid**', '3.618', 'Cl_meta', 'C5H4N4O3'), ('9H-purine-2,6,8-triol**', '3.618', 'Cl_meta', 'C5H4N4O3'), ('isourate**', '3.618', 'Cl_meta', 'C5H4N4O3'), ('Uric acid**', '3.618', 'Cl_hmdb', 'C5H4N4O3')]	Class 2	Class 2	Class 2	0.000392103	0.000347555	0	4	0	8	54	73
632	203.002	negative	no	203.002	203.002	276.119	274.883	293.882	[('o-methoxycatechol-o-sulphate', 1.0)]	stable	stable	stable	7.11925e-05	9.52176e-05	0	0	0	29	1	49
633	203.002	negative	no	203.002	203.002	242.993	240.993	245.676	[('o-methoxycatechol-o-sulphate', 1.0)]	stable	Class 3	stable	0.000549019	0.000340227	3	6	0	18	8	49
635	203.093	negative	no	203.092	203.093	271.339	253.793	274.186	[('diethyl (2s,3r)-2-methyl-3-hydroxysuccinate', 1.0)]	stable	stable	stable	8.56743e-05	0.00010176	0	3	0	93	18	64
642	204.03	negative	no	204.03	204.03	215.148	214.131	217.117	[('xanthurenic acid', 1.0), ('zeanic acid', 1.0), ('4,6-dihydroxy-2-quinolinecarboxylic acid', 1.0), ('6-hydroxykynurenic acid', 1.0)]	Class 3	Class 2	stable	0.000131303	0.000128697	0	2	0	28	21	10
643	204.067	negative	no	204.067	204.067	322.544	320.828	323.788	[('5-methoxyindoleacetate', 1.0), ('(r)-(indol-3-yl)lactate', 1.0), ('indolelactic acid', 1.0), ('cinnamoylglycine', 1.0)]	stable	stable	stable	0.00324902	0.00145429	0	6	1	83	76	32
644	204.124	negative	no	204.123	204.124	189.301	186.843	216.597	[('pantothenol', 1.0)]	Class 2	Class 2	stable	0.00961971	0.00259203	50	40	0	88	21	62
647	204.957	negative	no	204.957	204.957	29.6774	25.1245	30.2463	[('2,6-dichloro-4-nitroaniline**', '3.078', 'M-H_chebi', 'C6H4Cl2N2O2'), ('aminopyralid**', '3.078', 'M-H_chebi', 'C6H4Cl2N2O2')]	Class 2	Class 2	Class 2	0.00017029	0.00014332	0	3	0	48	61	57
648	204.981	negative	no	204.981	204.981	174.39	171.468	195.294	[('5-sulfoxymethylfurfural', 1.0), ('pyrogallol-1-o-sulphate', 1.0), ('pyrogallol-2-o-sulphate', 1.0)]	Class 2	stable	stable	0.000219364	0.000184394	3	5	0	11	21	92
649	204.981	negative	no	204.981	204.981	129.276	112.431	147.795	[('5-sulfoxymethylfurfural', 1.0), ('pyrogallol-1-o-sulphate', 1.0), ('pyrogallol-2-o-sulphate', 1.0)]	Class 3	Class 2	stable	0.00123001	0.000653122	4	6	0	27	8	49
651	205.035	negative	no	205.035	205.036	153.676	134.326	163.796	[('methylisocitric acid', 1.0), ('homoisocitrate', 1.0), ('(s)-lipoic acid', 1.0)]	Class 2	Class 2	Class 3	0.000784955	0.000684211	0	7	3	5	41	63
652	205.035	negative	no	205.035	205.036	106.996	93.5758	124.95	[('(2R,3S)-2-methylcitric acid**', '0.209', 'M-H_lipid', 'C7H10O7'), ('(2S,3R)-3-hydroxybutane-1,2,3-tricarboxylic acid**', '0.209', 'M-H_lipid', 'C7H10O7')]	Class 2	Class 2	Class 3	0.000430261	0.000327359	0	1	0	37	50	31
662	206.046	negative	no	206.046	206.046	246.636	243.624	250.541	[('4-(2-aminophenyl)-2,4-dioxobutanoate', 1.0), ('2-formaminobenzoylacetate', 1.0), ('4-(2-aminophenyl)-2,4-dioxobutanoic acid', 1.0)]	stable	stable	stable	0.000203928	0.000175875	0	6	0	18	98	75
663	206.046	negative	no	206.045	206.046	196.689	195.149	212.432	[('4-(2-aminophenyl)-2,4-dioxobutanoic acid', 1.0), ('2-formaminobenzoylacetate', 1.0), ('4-(2-aminophenyl)-2,4-dioxobutanoate', 1.0)]	Class 1	Class 3	stable	0.000969152	0.000490257	38	31	0	61	34	74
664	206.102	negative	no	206.102	206.103	218.907	217.182	225.43	206.10172Da/218.90657	stable	stable	stable	0.00019298	0.000157933	0	3	0	15	85	10
665	206.87	negative	no	206.87	206.87	33.1857	31.0532	34.157	206.86988Da/33.18568s	Class 2	Class 3	Class 3	0.000147798	0.000122515	0	5	0	2	45	25
666	206.973	negative	no	206.973	206.974	27.0413	25.5072	51.0183	206.97287Da/27.04129s	stable	stable	stable	0.000112386	0.000115864	0	0	0	2	79	76
668	206.997	negative	no	206.997	206.997	176.524	173.436	180.875	[('(Z)-[3-(Methylsulfinyl)-1-propenyl] 2-propenyl disulfide**', '3.707', 'M-H_hmdb', 'C7H123')]	Class 2	Class 2	Class 3	0.000280516	0.000275143	3	8	0	37	19	28
669	207.066	negative	no	207.066	207.067	284.661	266.384	285.502	[('benzylsuccinate', 1.0), ('3-(3,4-dimethoxyphenyl)-2-propenoic acid', 1.0)]	Class 1	Class 1	stable	0.000384338	0.000265416	2	2	2	97	98	31
671	207.086	negative	no	207.086	207.086	301.203	299.472	302.127	207.08574Da/301.2027	stable	stable	stable	0.000120063	9.04435e-05	0	1	0	15	85	75
672	207.105	negative	no	207.105	207.105	219.433	217.883	225.43	207.10502Da/219.43285s	stable	stable	stable	0.000101481	0.000116395	0	2	0	15	73	43
673	207.811	negative	no	207.811	207.812	33.3524	31.6229	34.5181	207.81142Da/33.35236s	Class 2	Class 3	Class 2	0.000217633	0.000209611	1	9	11	45	66	29
684	207.976	negative	no	207.976	207.976	27.1308	25.638	28.8979	207.97613Da/27.13084s	stable	stable	stable	9.88832e-05	7.93974e-05	0	0	0	2	79	76
685	208.062	negative	no	208.062	208.062	281.706	262.84	282.55	[('3-carbamoyl-2-phenylpropionic acid', 1.0)]	stable	stable	stable	0.00196381	0.00108385	0	6	41	83	40	49
687	208.845	negative	no	208.845	208.846	30.9239	28.6387	31.7965	208.84542Da/30.92393s	stable	stable	Class 3	0.00153454	0.00102269	0	4	37	47	84	4
688	208.977	negative	no	208.977	208.977	27.0865	25.6933	28.0776	[('phenyl phosphate**', '2.080', 'Cl_chebi', 'C6H7O4P1')]	Class 1	stable	stable	9.06572e-05	9.0412e-05	0	2	0	2	79	76
691	209.068	negative	no	209.068	209.068	225.479	222.704	228.533	[('1,3,7-trimethyluric acid', 1.0), ('1,3,9-trimethyluric acid', 1.0)]	stable	Class 3	stable	0.00116355	0.000750554	20	32	0	18	21	61
692	209.08	negative	no	209.079	209.08	326.659	325.471	327.608	209.07965Da/326.65933s	Class 1	Class 1	Class 1	0.000125059	0.000109431	2	3	3	80	35	64
693	209.809	negative	no	209.808	209.809	33.2991	30.3163	34.5181	209.80853Da/33.29911s	Class 3	stable	Class 3	0.000170039	0.000160681	0	15	0	9	49	71
696	210.008	negative	no	210.008	210.008	40.3723	37.9027	41.4045	210.00787Da/40.37229	Class 2	Class 2	Class 2	0.000182108	0.000159482	1	6	0	86	58	29
697	210.842	negative	no	210.842	210.843	30.9508	28.6387	32.1804	210.84249Da/30.95084s	stable	stable	stable	0.00139591	0.000856927	0	7	17	47	84	19
698	211.061	negative	no	211.061	211.061	305.963	304.215	308.651	[('3,4-dihydroxyphenyllactic acid methyl ester', 1.0), ('3-(3,4-dihydroxyphenyl)-2-methoxypropionic acid', 1.0), ('propyl gallate', 1.0)]	Class 1	stable	stable	0.000386342	0.00034788	6	5	0	50	74	83
699	211.061	negative	no	211.061	211.061	234.32	210.507	237.593	[('2,3-dihydroxy-1-(4-hydroxy-3-methoxyphenyl)-1-propanone', 1.0), ('danielone', 1.0)]	stable	stable	stable	0.00039393	0.000274316	0	4	1	14	1	36
700	211.084	negative	no	211.084	211.084	193.308	192.295	196.789	[('histidinyl-glycine', 1.0)]	stable	stable	stable	0.00119483	0.000508308	28	25	0	18	13	82
702	212.002	negative	no	212.002	212.003	248.711	229.648	267.635	[('indoxyl sulfate', 1.0)]	Class 2	Class 2	Class 2	0.000137058	0.000135841	2	2	0	61	52	21
703	212.84	negative	no	212.839	212.84	30.9434	29.01	32.1804	212.83954Da/30.94344s	stable	Class 3	Class 3	0.000902049	0.000698907	0	6	12	47	63	99
704	212.877	negative	no	212.877	212.878	31.2502	29.5193	32.2075	212.87746Da/31.25018s	stable	Class 3	stable	0.00018872	0.000169521	0	6	1	66	76	99
705	212.887	negative	no	212.887	212.887	31.5474	29.5624	32.7689	212.88698Da/31.54744s	stable	Class 3	Class 3	0.000263473	0.000263199	0	8	7	96	35	22
708	212.911	negative	no	212.911	212.911	547.102	525.327	555.443	212.91096Da/547.10181s	stable	stable	stable	0.000201132	0.000190434	0	4	0	72	61	48
709	213.017	negative	no	213.017	213.018	38.5984	29.7779	40.6782	[('1-deoxy-d-xylulose 5-phosphate', 1.0), ('2-deoxy-d-ribose 1-phosphate', 1.0), ('deoxyribose 5-phosphate', 1.0), ('deoxyribose 1-phosphate', 1.0), ('deoxyribose 5-monophosphate', 1.0)]	Class 2	Class 3	stable	0.00359184	0.00155413	3	1	8	20	40	95
710	213.113	negative	no	213.113	213.113	359.803	359.004	373.7	[('5-Hexyltetrahydro-2-oxo-3-furancarboxylic acid**', '0.546', 'M-H_hmdb', 'C11H18O4'), ('alpha-Carboxy-delta-decalactone**', '0.546', 'M-H_hmdb', 'C11H18O4'), ('2-Carboxy-5,7-dimethyl-4-octanolide**', '0.546', 'M-H_hmdb', 'C11H18O4')]	stable	stable	stable	0.000278591	0.000222889	0	2	0	18	21	60
711	213.889	negative	no	213.889	213.89	50.5429	46.7234	57.9144	213.88938Da/50.5429s	Class 2	Class 2	stable	0.00180803	0.000990964	0	50	50	34	53	21
715	214.145	negative	no	214.145	214.145	340.794	339.679	341.512	[('ethyl 3-(n-butylacetamido)propionate', 1.0), ('n-nonanoylglycine', 1.0)]	Class 2	Class 2	Class 1	0.000214234	0.000140279	0	24	7	24	77	7
716	214.837	negative	no	214.836	214.837	31.1918	29.1866	31.5875	214.83654Da/31.19182	Class 2	Class 2	Class 2	0.000152928	0.000130704	0	8	0	45	10	22
717	214.875	negative	no	214.874	214.875	31.5474	29.6869	32.5795	214.87456Da/31.54737s	Class 2	Class 2	Class 2	0.000129133	0.000129374	1	6	0	34	97	22
718	214.884	negative	no	214.884	214.884	31.565	29.5624	32.2075	214.88404Da/31.56496s	stable	Class 3	Class 3	0.000134282	0.000163264	0	4	0	70	92	37
720	215.033	negative	no	215.033	215.033	34.8192	32.5774	36.711	[('2-c-methyl-d-erythritol 4-phosphate', 1.0)]	stable	stable	stable	0.00740232	0.00252088	0	50	50	11	88	27
721	215.093	negative	no	215.092	215.093	284.12	270.902	285.51	[('(Z)-3-hydroxydec-2-enedioic acid**', '0.435', 'M-H_chebi', 'C10H16O5')]	stable	stable	stable	8.95046e-05	7.64755e-05	0	2	0	18	51	6
722	215.104	negative	no	215.103	215.104	146.908	131.518	171.713	[('threoninyl-proline', 1.0), ('gamma-glutamyl-gamma-aminobutyraldehyde', 1.0)]	Class 2	Class 3	stable	0.00464059	0.00209091	2	4	0	41	71	28
723	215.129	negative	no	215.129	215.129	383.365	382.591	384.177	[('undecanedioic acid', 1.0), ('butyl butyryllactate', 1.0)]	stable	stable	stable	0.000242772	0.000191502	0	13	1	93	18	64
725	215.886	negative	no	215.886	215.887	50.3514	46.7234	57.9144	215.88642Da/50.35144s	Class 2	Class 2	Class 3	0.00231892	0.00122852	0	41	50	78	53	13
726	216.036	negative	no	216.036	216.037	34.8235	32.1807	35.8225	216.03629Da/34.82349	Class 2	Class 2	stable	0.00819551	0.0026435	0	50	50	43	92	27
729	216.124	negative	no	216.124	216.124	260.95	258.877	262.43	[('o-propanoyl-carnitine', 1.0), ('o-propanoyl-carnitine', 1.0), ('propionylcarnitine', 1.0)]	Class 2	Class 2	Class 2	0.000162405	0.000139564	0	6	0	24	77	7
730	216.132	negative	no	216.132	216.133	383.315	382.525	384.097	216.13237Da/383.31458	Class 1	Class 2	Class 1	0.000178623	0.000182977	0	9	7	80	63	64
733	216.889	negative	no	216.889	216.89	34.2903	27.4365	37.1771	216.88939Da/34.29028s	Class 1	stable	Class 1	0.000527464	0.000390796	8	4	17	68	78	25
734	216.91	negative	no	216.909	216.91	34.7266	30.2668	37.1592	216.90969Da/34.72655s	Class 3	Class 2	Class 3	0.000155298	0.00013996	1	5	0	35	54	37
735	216.919	negative	no	216.919	216.919	32.458	29.7789	35.6223	216.91909Da/32.45801s	Class 3	Class 2	Class 3	0.000435406	0.000334459	0	5	1	20	61	37
736	216.937	negative	no	216.937	216.937	29.7993	27.1392	30.9914	216.93728Da/29.79925s	stable	stable	stable	0.000502829	0.000425131	0	3	0	0	60	88
737	216.981	negative	no	216.981	216.982	192.679	189.949	215.269	[('5-Sulfosalicylic acid**', '0.814', 'M-H_hmdb', 'C7H6O6S1'), ('3-hydroxybenzoic acid-3-O-sulphate**', '0.814', 'M-H_hmdb', 'C7H6O6S1'), ('4-hydroxybenzoic acid-4-O-sulphate**', '0.814', 'M-H_hmdb', 'C7H6O6S1')]	Class 2	Class 2	stable	8.4753e-05	9.88884e-05	0	2	0	11	87	61
738	217.018	negative	no	217.018	217.018	324.315	323.18	325.222	[('tyrosol 4-sulfate', 1.0)]	stable	Class 3	stable	0.00411562	0.00165065	50	29	0	83	71	98
739	217.03	negative	no	217.03	217.03	34.7347	32.4367	36.1834	[('diisopropyl sulfate', 1.0)]	Class 3	Class 3	stable	0.00600765	0.00221012	1	50	12	11	88	27
741	217.049	negative	no	217.048	217.049	33.9653	31.6793	35.2868	[('l-iditol', 1.0), ('d-altritol', 1.0)]	Class 2	Class 3	stable	0.00460165	0.00192028	3	2	0	29	40	39
743	217.108	negative	no	217.108	217.108	303.637	287.513	342.579	[('2-hydroxydecanedioic acid', 1.0), ('3-hydroxysebacic acid', 1.0), ('2-hydroxydecanedioic acid', 1.0), ('3-hydroxysebacic acid', 1.0)]	stable	stable	stable	0.000124542	0.000118504	0	2	0	4	18	32
744	217.12	negative	no	217.119	217.12	171.961	159.245	180.217	[('isoleucyl-serine', 1.0), ('leucyl-serine', 1.0), ('serinyl-isoleucine', 1.0), ('serinyl-leucine', 1.0), ('threoninyl-valine', 1.0), ('valyl-threonine', 1.0), ('meprobamate', 1.0)]	Class 3	Class 2	Class 3	0.00155361	0.00105524	1	13	4	43	14	50
746	217.854	negative	no	217.854	217.854	543.622	525.362	577.855	217.85404Da/543.62198s	stable	stable	stable	0.000111564	8.07342e-05	0	3	0	84	73	69
749	218.049	negative	no	218.049	218.05	150.507	131.398	167.01	[('2-amino-a-carboline', 1.0), ('2-amino-a-carboline', 1.0)]	Class 2	Class 3	Class 3	0.000903891	0.000678524	0	3	0	11	76	17
750	218.104	negative	no	218.103	218.104	187.782	185.605	195.943	[('pantothenate', 1.0), ('pantothenic acid', 1.0)]	Class 2	Class 3	stable	0.00013146	0.000115238	0	1	0	11	65	10
752	218.874	negative	no	218.874	218.874	30.4317	28.9417	31.5875	218.87426Da/30.43172s	Class 1	Class 1	Class 2	0.000144076	0.000132577	0	2	0	46	23	22
753	218.934	negative	no	218.934	218.935	29.9759	28.0816	30.7201	218.93449Da/29.97586s	stable	stable	stable	0.000317112	0.00034817	0	5	0	77	60	44
754	218.997	negative	no	218.997	218.997	237.306	235.82	240.896	[('2-methoxyresorcinol sulfate**', '1.527', 'M-H_chebi', 'C7H8O6S1')]	Class 3	Class 3	stable	0.000243214	0.000262429	0	0	0	83	71	49
755	218.997	negative	no	218.997	218.997	149.504	143.817	160.548	[('2-methoxyresorcinol sulfate**', '1.573', 'M-H_chebi', 'C7H8O6S1')]	Class 2	Class 2	stable	0.000207045	0.000232497	0	1	0	29	19	32
756	218.997	negative	no	218.997	218.997	188.936	186.843	196.941	[('2-methoxyresorcinol sulfate**', '1.573', 'M-H_chebi', 'C7H8O6S1')]	Class 2	Class 3	stable	0.000196834	0.000201759	0	1	0	11	19	49
758	219.046	negative	no	219.045	219.046	33.9209	31.6793	35.163	219.04563Da/33.92086s	Class 2	Class 2	stable	0.00356639	0.00156447	10	3	0	41	65	63
759	219.051	negative	no	219.051	219.051	210.599	208.725	214.061	[('(r)-(homo)2-citrate', 1.0), ('(-)-threo-iso(homo)2-citrate', 1.0), ('3-hydroxy-3-carboxymethyl-adipic acid', 1.0)]	Class 2	Class 2	Class 3	7.27685e-05	7.64869e-05	0	1	0	11	19	35
763	219.947	negative	no	219.947	219.948	336.999	336.053	338.222	219.94708Da/336.9986	stable	stable	Class 3	0.000158318	0.000151402	1	6	2	64	13	53
766	220.871	negative	no	220.871	220.871	30.4317	28.9417	31.6056	[('1,1,2-Trichloro-1,2,2-trifluoroethane**', '0.862', 'Cl_hmdb', 'C2Cl3F3')]	stable	Class 1	Class 1	0.000394592	0.000332849	0	1	3	12	23	22
767	221.067	negative	no	221.067	221.067	84.435	71.8675	93.7175	[('6-acetyl-d-glucose', 1.0), ('ethyl glucuronide', 1.0)]	Class 3	Class 2	Class 2	0.000386508	0.000290972	8	23	0	11	45	38
771	221.903	negative	no	221.903	221.903	562.539	538.315	584.299	221.90296Da/562.53894s	stable	stable	stable	0.000117087	0.000122223	0	2	1	84	36	94
773	222.868	negative	no	222.868	222.868	30.8113	26.252	31.5875	222.86833Da/30.81131s	stable	Class 1	Class 1	9.37372e-05	0.00012271	0	2	0	66	25	22
774	222.886	negative	no	222.886	222.886	30.6305	28.3771	31.2732	222.88607Da/30.63052s	stable	Class 3	Class 3	0.000833127	0.000732219	0	3	10	30	60	19
775	222.887	negative	no	222.887	222.887	192.927	190.755	198.784	222.88708Da/192.9273s	Class 2	Class 2	Class 2	0.000128797	0.000109138	2	1	0	22	40	21
776	222.899	negative	no	222.899	222.899	27.3345	24.8716	28.3367	222.89921Da/27.33445s	stable	stable	stable	0.000355689	0.000228184	5	7	0	77	0	70
777	222.992	negative	no	222.992	222.992	79.9829	71.2771	88.4144	[('4-chloro-3-nitro-1H-quinolin-2-one**', '1.277', 'M-H_chebi', 'C9H5Cl1N2O3')]	stable	stable	stable	0.000365854	0.000331421	3	2	0	27	13	49
778	222.992	negative	no	222.992	222.992	146	137.483	158.27	[('4-chloro-3-nitro-1H-quinolin-2-one**', '1.143', 'M-H_chebi', 'C9H5Cl1N2O3')]	Class 2	Class 2	Class 2	0.00103081	0.000674843	0	2	1	69	1	10
781	224.057	negative	no	224.056	224.057	223.658	221.668	226.78	[('vanilloylglycine', 1.0), ('4-amino-4-deoxychorismate', 1.0), ('2-amino-2-deoxyisochorismate', 1.0)]	stable	Class 3	stable	0.000493239	0.000461232	3	0	0	83	71	49
782	224.062	negative	no	224.062	224.062	331.359	317.699	333.104	[('4-Chloro-[2-(4-Pyridinyl)-1-butenyl]phenol**', '2.551', 'M-H-H2O_chebi', 'C15H14Cl1N1')]	stable	stable	stable	0.000221762	0.000225038	1	2	0	5	21	32
783	224.079	negative	no	224.079	224.079	139.432	109.604	153.534	[('aciclovir', 1.0)]	Class 2	Class 2	Class 1	0.00511263	0.00246698	4	4	5	50	42	83
785	224.093	negative	no	224.092	224.093	285.235	268.42	285.896	[('(2S)-2-amino-3-(4-hydroxy-3-methoxyphenyl)-2-methylpropanoic acid**', '0.746', 'M-H_hmdb', 'C11H15N1O4')]	Class 3	stable	Class 3	0.000500009	0.000361724	0	7	7	5	48	21
786	224.866	negative	no	224.866	224.867	35.3805	33.2461	41.2558	[('tetrathionate', 1.0)]	Class 2	Class 2	Class 2	0.00455061	0.00211068	2	23	50	46	75	71
788	225.008	negative	no	225.007	225.008	41.8355	39.2093	44.2139	[('4-nitroquinoline n-oxide', 1.0), ('nitroxoline', 1.0)]	Class 2	Class 2	Class 2	0.000596448	0.000411706	3	6	0	88	35	29
789	225.088	negative	no	225.088	225.088	185.64	183.135	192.832	[('porphobilinogen', 1.0)]	Class 3	stable	stable	0.00111257	0.000747849	0	1	0	28	67	32
790	225.113	negative	no	225.113	225.114	283.863	282.327	284.895	[('3,4-methylenesebacic acid', 1.0), ('lmfa01170130', 1.0), ("epi-4'-hydroxyjasmonic acid", 1.0), ('12-hydroxyjasmonic acid', 1.0), ('12-hydroxyjasmonate', 1.0)]	stable	stable	stable	0.000182636	0.000145685	3	4	0	83	98	10
795	226.862	negative	no	226.862	226.862	35.4164	33.2461	36.3567	[('periodic acid**', '3.846', 'Cl_chebi', 'H1I1O4')]	Class 2	Class 2	Class 2	0.00433161	0.00218425	2	50	50	22	75	3
796	226.918	negative	no	226.918	226.918	28.7947	27.1166	29.6822	226.91826Da/28.79466s	stable	stable	stable	0.00171469	0.00098422	6	2	6	46	28	12
797	226.966	negative	no	226.965	226.966	29.1324	22.7796	30.2207	226.9662Da/29.13241	stable	stable	stable	0.000209184	0.000186314	0	2	0	19	2	51
799	227.035	negative	no	227.035	227.035	351.369	349.281	352.087	[('urolithin a', 1.0), ('euxanthone', 1.0)]	stable	stable	stable	9.37102e-05	0.000113151	0	2	0	64	98	61
800	227.104	negative	no	227.103	227.104	48.1547	42.9733	55.5631	[('hydroxyprolyl-proline', 1.0), ('prolyl-hydroxyproline', 1.0), ('(s)-atpa', 1.0)]	Class 3	stable	Class 3	0.0016024	0.000966614	3	32	0	29	65	63
801	227.104	negative	no	227.103	227.104	214.431	181.512	217.689	[('hydroxyprolyl-proline', 1.0), ('(s)-atpa', 1.0)]	stable	stable	stable	0.000199168	0.000253013	3	3	0	40	87	80
802	227.115	negative	no	227.115	227.116	41.0902	37.3933	48.9046	[('deoxyguanidinoproclavaminic acid', 1.0)]	Class 3	Class 3	stable	0.000201063	0.000164551	2	0	0	98	21	19
803	227.129	negative	no	227.129	227.129	439.717	435.96	440.357	[('traumatic acid', 1.0), ('lmfa01170033', 1.0), ('(-)-11-hydroxy-9,10-dihydrojasmonic acid', 1.0), ('(-)-12-hydroxy-9,10-dihydrojasmonic acid', 1.0), ('5-heptyltetrahydro-2-oxo-3-furancarboxylic acid', 1.0)]	stable	stable	stable	0.000664563	0.000568294	1	48	30	64	89	74
804	227.129	negative	no	227.129	227.129	390.569	389.65	391.237	[('lmfa01170033', 1.0), ('traumatic acid', 1.0)]	stable	stable	stable	0.000197048	0.000171824	0	5	0	14	34	42
805	227.129	negative	no	227.128	227.129	292.36	291.848	326.291	[('lmfa01170033', 1.0), ('traumatic acid', 1.0)]	stable	stable	stable	0.000105801	0.000125537	0	1	0	64	98	92
806	227.14	negative	no	227.14	227.14	213.792	212.748	215.834	[('isoleucyl-proline', 1.0), ('leucyl-proline', 1.0)]	stable	stable	stable	0.00257548	0.00141681	2	9	50	16	14	48
807	227.905	negative	no	227.905	227.905	90.1579	81.2896	97.6727	227.90506Da/90.15791s	Class 2	Class 3	stable	0.000163779	0.000157361	0	1	0	11	19	68
808	227.967	negative	no	227.967	227.969	29.1328	26.5939	30.2207	227.96681Da/29.13275s	stable	stable	stable	0.000221026	0.000210143	2	5	0	7	2	75
809	227.997	negative	no	227.997	227.998	174.628	170.063	200.478	227.99746Da/174.62762	Class 2	Class 3	stable	0.000195514	0.000214116	0	1	0	11	19	11
810	228.161	negative	no	228.161	228.161	366.657	365.334	367.64	[('N-decanoylglycine**', '0.061', 'M-H_chebi', 'C12H23N1O3')]	Class 1	Class 1	Class 1	0.00022444	0.000198518	0	7	0	93	77	64
811	228.161	negative	no	228.161	228.161	442.632	442.05	442.979	[('n-decanoylglycine', 1.0)]	Class 1	Class 2	Class 3	0.0136446	0.002496	50	48	7	57	19	50
813	228.903	negative	no	228.903	228.903	30.1322	27.8693	30.9914	[('4-iodopyrazole**', '1.557', 'Cl_chebi', 'C3H32')]	stable	stable	stable	0.000390753	0.000355227	1	4	1	30	96	78
814	228.964	negative	no	228.964	228.964	29.1431	26.6171	30.2207	228.9637Da/29.14313	stable	stable	stable	0.000316529	0.000273768	1	5	0	54	2	75
817	229.054	negative	no	229.054	229.054	380.795	379.57	381.987	[('thymol sulfate', 1.0)]	Class 3	stable	stable	0.000180656	0.000177443	3	5	0	27	76	69
818	229.108	negative	no	229.108	229.108	314.355	278.093	344.345	[('Dicyclohexyl disulfide**', '2.721', 'M-H_hmdb', 'C12H22S2')]	Class 1	Class 1	stable	9.73497e-05	8.4347e-05	2	4	1	93	18	35
819	229.145	negative	no	229.145	229.145	404.013	402.739	410.462	[('dodecanedioic acid', 1.0)]	stable	stable	stable	0.000141654	0.000158613	0	1	0	64	3	64
820	229.156	negative	no	229.155	229.156	206.538	183.272	223.275	[('isoleucyl-valine', 1.0), ('leucyl-valine', 1.0)]	Class 1	Class 1	stable	0.00151687	0.000972389	1	4	8	11	16	5
823	230.013	negative	no	230.013	230.013	183.335	180.676	191.817	[('paracetamol sulfate', 1.0)]	Class 3	stable	stable	0.000118399	0.000121909	2	6	0	28	44	5
825	230.14	negative	no	230.139	230.14	278.124	252.191	278.875	[('butyrylcarnitine', 1.0), ('isobutyryl-l-carnitine', 1.0), ('butyrylcarnitine', 1.0), ('o-butanoylcarnitine', 1.0)]	Class 3	Class 3	Class 3	9.83192e-05	9.36117e-05	0	2	0	4	69	7
826	230.801	negative	no	230.801	230.802	33.3069	30.8393	34.5181	230.80131Da/33.30689s	Class 3	Class 3	Class 2	0.000100564	9.40062e-05	2	4	0	33	39	13
828	230.9	negative	no	230.9	230.9	30.0217	27.8693	30.9914	230.90012Da/30.02165s	stable	stable	Class 1	0.000517898	0.000372584	1	4	10	15	96	78
829	230.997	negative	no	230.996	230.997	241.626	239.731	244.232	[('2,4-dihydroxyacetophenone 5-sulfate', 1.0)]	stable	Class 3	stable	0.00204816	0.00134405	50	6	0	83	8	75
830	230.997	negative	no	230.997	230.997	210.843	210.061	214.415	[('vanillin 4-sulfate', 1.0)]	Class 2	Class 2	stable	7.93179e-05	8.68358e-05	0	1	0	11	19	35
831	231.016	negative	no	231.016	231.017	182.026	180.676	190.488	[('cnqx', 1.0)]	Class 2	Class 2	Class 3	0.000176542	0.000171544	0	3	0	29	44	80
832	231.124	negative	no	231.124	231.124	317.588	316.607	329.036	[('1,2-dibutyrin**', '1.001', 'M-H_meta', 'C11H20O5')]	stable	stable	stable	0.000107994	9.10073e-05	3	0	0	4	15	64
839	232.029	negative	no	232.029	232.029	122.325	108.296	134.32	[('dopamine 3-O-sulfate**', '0.017', 'M-H_chebi', 'C8H11N1O5S1'), ('sulbactam**', '0.017', 'M-H_chebi', 'C8H11N1O5S1'), ('dopamine 4-O-sulfate**', '0.017', 'M-H_chebi', 'C8H11N1O5S1'), ('dopamine 3-O-sulfate zwitterion**', '0.017', 'M-H_chebi', 'C8H11N1O5S1'), ('dopamine 4-O-sulfate zwitterion**', '0.017', 'M-H_chebi', 'C8H11N1O5S1'), ('2-(2-chlorophenyl)-5-(methylamino)-4-oxazolecarbonitrile**',…	Class 2	Class 2	Class 3	0.000115495	0.000122777	0	4	0	89	73	11
840	232.915	negative	no	232.915	232.915	29.752	27.1392	30.9914	232.91498Da/29.75196s	stable	stable	stable	0.000290718	0.000297026	0	2	0	77	60	56
841	232.923	negative	no	232.922	232.923	29.2468	26.6171	29.8848	232.92263Da/29.24683s	Class 3	stable	stable	0.000249985	0.000251613	3	2	3	71	63	24
843	232.935	negative	no	232.935	232.935	28.2228	27.5012	30.7486	232.93508Da/28.22278	stable	stable	stable	0.00106033	0.000697804	1	16	50	11	54	27
844	232.976	negative	no	232.976	232.976	187.638	186.843	192.49	[('4-hydroxy-3-(sulfooxy)benzoic acid**', '1.078', 'M-H_hmdb', 'C7H6O7S1'), ('2-hydroxy-3-(sulfooxy)benzoic acid**', '1.078', 'M-H_hmdb', 'C7H6O7S1')]	Class 2	Class 2	stable	0.000406711	0.000313956	0	9	21	79	44	80
845	233.013	negative	no	233.013	233.013	181.424	179.566	199.222	[('(4-ethyl-2,6-dihydroxyphenyl)oxidanesulfonic acid**', '0.884', 'M-H_hmdb', 'C8H10O6S1')]	Class 2	Class 2	Class 3	0.000171174	0.00014288	0	1	0	11	87	47
849	234.803	negative	no	234.802	234.803	33.1854	30.8393	34.5181	234.80257Da/33.18544s	Class 2	Class 2	Class 2	0.000170682	0.000125994	0	6	1	45	58	29
851	234.86	negative	no	234.859	234.86	30.869	28.6387	31.8321	234.85958Da/30.86903s	stable	stable	stable	0.000203531	0.000180797	0	6	0	56	41	50
852	234.869	negative	no	234.869	234.869	30.9311	28.6387	31.7965	234.86886Da/30.93112s	stable	stable	stable	0.000241138	0.00020209	0	6	0	96	69	19
854	234.912	negative	no	234.912	234.912	29.83	28.0816	30.9914	234.91193Da/29.82997s	stable	stable	Class 1	0.000161809	0.000199723	0	2	2	17	17	44
855	234.935	negative	no	234.935	234.936	26.2975	24.3105	27.4189	234.93533Da/26.29754s	stable	stable	stable	0.000185556	0.00020042	0	11	0	7	46	3
862	236.8	negative	no	236.799	236.8	33.0484	31.1706	34.5181	236.79963Da/33.04839s	Class 2	Class 2	Class 2	0.000219542	0.000179897	0	9	0	42	58	29
863	236.857	negative	no	236.856	236.857	30.8924	28.1778	31.8321	236.85657Da/30.89243s	stable	stable	stable	0.00026835	0.000230515	0	6	0	56	41	50
864	236.866	negative	no	236.866	236.866	30.9799	28.7361	32.1804	236.86599Da/30.97995s	stable	stable	Class 3	0.000277045	0.000204575	1	3	0	96	69	4
866	237.931	negative	no	237.931	237.931	209.262	207.6	212.187	237.93104Da/209.2619s	Class 2	Class 2	stable	0.00897286	0.00291484	50	50	0	82	87	59
867	238.078	negative	no	238.078	238.078	331.98	331.262	333.882	238.0777Da/331.97961s	Class 3	stable	stable	0.000357686	0.000251297	2	6	0	5	21	32
868	238.854	negative	no	238.853	238.854	30.9045	26.8116	31.6056	238.85357Da/30.90452s	stable	Class 3	Class 2	9.1867e-05	9.36362e-05	0	1	0	85	47	4
871	238.892	negative	no	238.892	238.892	29.0433	27.5012	30.505	[('trimetaphosphoric acid', 1.0)]	Class 2	Class 3	Class 3	0.000266162	0.000275872	0	2	0	54	8	28
874	238.964	negative	no	238.964	238.964	27.4597	25.9808	27.6095	[('1-chloro-2,4-dinitrobenzene**', '4.136', 'Cl_meta', 'C6H3N2O4Cl1')]	Class 2	Class 2	stable	0.000294683	0.000233139	0	6	11	48	12	2
876	239.761	negative	no	239.76	239.761	33.3123	31.1706	34.2842	239.76058Da/33.3123s	Class 3	Class 1	Class 1	0.00120532	0.000936172	20	4	0	12	43	13
882	241.108	negative	no	241.108	241.109	292.36	290.038	293.278	241.10839Da/292.35976	stable	stable	stable	0.000171884	0.000190417	1	1	0	64	98	75
883	241.108	negative	no	241.108	241.109	355.104	354.575	355.913	241.10839Da/355.10385	stable	stable	stable	0.000839367	0.000524113	5	50	0	37	57	31
884	241.12	negative	no	241.119	241.12	262.56	252.074	264.095	[("poly(N,N'-methylenebisacrylamide-co-methacrylic acid)**", '0.306', 'M-H_chebi', 'C11H18N2O4')]	stable	stable	stable	0.00013615	0.000129219	0	5	0	14	40	97
891	241.884	negative	no	241.884	241.885	80.0783	74.5641	83.995	241.88441Da/80.07829s	Class 2	Class 2	Class 3	0.000317969	0.000265436	1	5	0	43	73	41
892	241.921	negative	no	241.921	241.921	161.439	156.896	171.713	241.92076Da/161.43857s	Class 2	Class 2	Class 3	0.000212017	0.000164707	3	7	0	89	21	92
893	241.977	negative	no	241.977	241.977	187.189	184.493	192.73	[('N-(3,5-Dichlorophenyl)succinimide**', '4.091', 'M-H_chebi', 'C10H7Cl2N1O2')]	stable	stable	stable	0.000102809	8.37475e-05	0	1	0	40	87	59
894	242.013	negative	no	242.013	242.013	207.929	206.323	209.388	242.01313Da/207.92932s	Class 2	Class 3	stable	0.000257807	0.000257771	0	1	0	11	19	89
895	242.14	negative	no	242.14	242.14	302.34	301.33	303.025	[('tiglylcarnitine', 1.0)]	Class 1	Class 1	Class 1	0.000117777	0.000112953	0	3	0	93	18	7
896	242.176	negative	no	242.176	242.177	391.209	390.447	392.25	[('n-undecanoylglycine', 1.0)]	stable	stable	stable	0.000207755	0.000169801	0	7	4	93	18	64
897	242.944	negative	no	242.944	242.945	29.1046	21.9535	29.9821	242.94383Da/29.10464	stable	stable	stable	0.000473636	0.00039073	1	3	0	7	96	75
898	243.018	negative	no	243.018	243.018	106.733	90.0524	125.376	[('sulfoquinovose', 1.0), ('6-deoxy-6-sulfo-d-fructose', 1.0)]	Class 2	Class 2	Class 2	0.00223029	0.000940137	48	43	0	36	71	31
900	243.034	negative	no	243.033	243.034	346.376	345.346	347.345	[('4-phenylbutanic acid-o-sulphate', 1.0)]	Class 3	stable	stable	0.000630406	0.000651699	0	2	0	5	67	6
901	243.063	negative	no	243.062	243.063	50.1465	46.1041	92.8655	[('pseudouridine', 1.0)]	stable	Class 2	stable	0.00212469	0.00156523	3	8	0	29	8	21
902	243.124	negative	no	243.123	243.124	283.363	278.483	291.811	243.12406Da/283.36307	stable	stable	stable	0.000179846	0.000168325	0	1	0	64	98	92
903	243.124	negative	no	243.124	243.124	342.332	325.369	343.43	243.12404Da/342.33228	stable	stable	stable	0.000268767	0.000209606	0	6	0	4	18	64
904	243.135	negative	no	243.134	243.135	279.52	261.403	280.869	[('isoleucyl-hydroxyproline', 1.0), ('leucyl-hydroxyproline', 1.0)]	stable	stable	stable	0.000120756	0.000107032	0	4	0	83	1	97
905	243.16	negative	no	243.16	243.161	433.081	432.286	434.253	[('lmfa01170010', 1.0), ('lmfa01170011', 1.0), ('lmfa01170012', 1.0), ('lmfa01170013', 1.0), ('1,11-undecanedicarboxylic acid', 1.0), ('1,11-undecanedicarboxylic acid', 1.0)]	Class 1	stable	stable	0.000359264	0.000338306	3	13	0	93	34	64
911	243.947	negative	no	243.947	243.947	29.101	26.0606	30.2207	243.94708Da/29.10099s	stable	stable	stable	0.000167695	0.00013296	1	4	0	6	73	36
914	244.888	negative	no	244.888	244.889	29.8949	27.66	30.9055	244.88839Da/29.89486s	stable	stable	stable	0.000783223	0.000654061	0	3	0	92	41	39
915	244.964	negative	no	244.964	244.964	27.4222	24.9916	28.6797	[('perfluoropentanoic acid**', '1.553', 'M-H-H2O_chebi', 'C59O2')]	stable	stable	stable	0.000591352	0.00048584	0	2	0	7	70	40
916	245.013	negative	no	245.013	245.013	256.217	253.869	258.262	245.01292Da/256.21741s	stable	stable	stable	0.000160416	0.000140393	0	4	0	83	76	92
917	245.044	negative	no	245.043	245.044	34.9363	32.5774	36.0739	[('glycerophosphoglycerol**', '3.560', 'M-H_chebi', 'C6H15O8P1'), ("sn-glycero-3-phospho-(1'-sn-glycerol)**", '3.560', 'M-H_chebi', 'C6H15O8P1'), ('sn-glycero-3-phosphoglycerol**', '3.560', 'M-H_chebi', 'C6H15O8P1'), ('Cys-Met thioether**', '3.560', 'M-H_chebi', 'C9H14N2O2S2')]	Class 2	Class 2	stable	0.000384149	0.000403269	1	1	0	40	76	82
918	245.049	negative	no	245.049	245.049	339.039	310.608	340.009	[('[3-(4-methoxyphenyl)propoxy]sulfonic acid**', '1.021', 'M-H_hmdb', 'C10H14O5S1')]	stable	stable	stable	0.000120748	0.000118363	0	7	0	83	1	99
921	245.115	negative	no	245.114	245.115	93.7419	85.3569	104.913	[('2,4-diacetamido-2,4,6-trideoxy-d-mannopyranose', 1.0), ('l-gamma-glutamyl-l-valine', 1.0), ('glutamylvaline', 1.0)]	Class 2	Class 2	stable	0.00257199	0.001432	0	6	27	16	14	48
922	245.91	negative	no	245.909	245.91	78.676	73.0246	86.064	245.90951Da/78.67596s	Class 2	Class 3	stable	6.59531e-05	9.15816e-05	0	3	0	11	19	74
923	245.965	negative	no	245.965	245.965	27.4179	24.9916	28.5632	245.96482Da/27.41792	stable	stable	stable	0.000320863	0.000305853	1	7	0	92	11	24
925	246.075	negative	no	246.075	246.075	305.986	303.676	307.759	246.07516Da/305.98584	Class 3	stable	stable	0.000476602	0.000451049	2	12	0	5	6	92
928	246.885	negative	no	246.885	246.885	30.0086	27.66	30.9055	246.88533Da/30.00861s	stable	stable	stable	0.000416615	0.000375638	1	2	3	17	41	79
929	246.911	negative	no	246.91	246.911	403.795	402.908	404.541	246.91052Da/403.79523s	stable	Class 3	Class 3	0.000387928	0.000281429	2	6	14	31	37	20
930	246.962	negative	no	246.962	246.962	27.3468	24.9916	28.5632	[('4-bromoisophthalate**', '2.801', 'M-H_meta', 'C8H9O4Br1')]	stable	stable	stable	0.000233778	0.00024643	4	6	0	7	70	52
932	246.992	negative	no	246.992	246.992	205.365	201.887	209.923	[('vanillic acid 4-sulfate', 1.0)]	Class 3	Class 3	stable	9.041e-05	7.09509e-05	0	0	0	5	8	10
935	247.907	negative	no	247.906	247.907	76.5221	72.8732	85.9309	247.90658Da/76.52211s	Class 2	Class 2	Class 3	0.000110433	9.20549e-05	0	2	0	11	87	13
937	248.9	negative	no	248.9	248.901	29.1775	22.7796	29.9821	248.9003Da/29.1775s	stable	stable	stable	0.000380417	0.00031347	17	7	1	39	23	9
938	248.908	negative	no	248.907	248.908	403.939	402.908	404.573	248.9076Da/403.9391s	stable	stable	Class 3	0.000406484	0.000279519	1	4	9	31	37	20
946	249.15	negative	no	249.149	249.15	551.442	549.56	551.912	[('pentalenic acid', 1.0), ('1-deoxy-11beta-hydroxypentalenic acid', 1.0), ('valerenolic acid', 1.0)]	stable	Class 1	stable	0.000192341	0.000132545	0	10	1	47	20	98
948	250.072	negative	no	250.072	250.073	271.509	269.959	272.971	[('4-hydroxy-3-methoxy-cinnamoylglycine', 1.0), ('4-hydroxy-3-methoxy-cinnamoylglycine', 1.0)]	stable	stable	stable	0.000972661	0.000704792	4	3	49	14	13	74
950	250.833	negative	no	250.833	250.834	30.9744	29.01	31.6056	250.83349Da/30.97444s	stable	Class 3	Class 2	0.000975311	0.000560227	3	2	0	40	29	4
952	251.056	negative	no	251.056	251.056	324.725	324.193	325.54	[('2-o-(z-p-hydroxycinnamoyl)-(x)-glyceric acid', 1.0)]	Class 3	Class 3	stable	0.000170606	0.000127903	2	1	0	89	21	14
953	251.096	negative	no	251.096	251.096	390.415	389.39	391.579	[('girgensonine', 1.0)]	Class 2	Class 3	Class 3	0.00516382	0.00218139	50	46	0	82	40	21
954	251.114	negative	no	251.114	251.114	216.77	214.615	218.35	[('2,3-butanediol glucoside', 1.0)]	Class 2	stable	stable	0.000317139	0.000281957	1	3	0	11	8	25
955	251.133	negative	no	251.132	251.133	498.169	475.232	501.734	[('(4R)-4,8-dimethylnonyl hydrogen sulfate**', '0.690', 'M-H_chebi', 'C11H24O4S1')]	Class 2	Class 3	stable	0.00437947	0.0021519	16	2	17	71	50	43
957	252.831	negative	no	252.83	252.831	30.9858	29.01	31.6056	252.83061Da/30.98577s	stable	Class 2	Class 2	0.00175412	0.00103414	5	17	0	96	7	4
958	252.902	negative	no	252.901	252.902	25.6948	24.2166	25.7746	252.90164Da/25.69483s	stable	stable	stable	0.000206526	0.000124248	0	2	0	7	59	9
960	252.946	negative	no	252.946	252.946	26.3339	25.313	27.4702	252.94613Da/26.33385	Class 2	stable	stable	9.03046e-05	9.23754e-05	0	1	0	58	79	76
961	253.051	negative	no	253.051	253.051	350.213	348.768	350.913	[('3,7-dihydroxy-2-phenyl-4h-chromen-4-one', 1.0), ('5-l-glutamyl-taurine', 1.0)]	stable	stable	stable	0.000842641	0.000408959	6	8	0	40	95	75
962	253.12	negative	no	253.119	253.12	199.104	197.468	206.541	[('midodrine', 1.0)]	Class 2	Class 3	Class 3	0.000130097	0.000111704	0	1	0	11	86	21
965	253.945	negative	no	253.944	253.945	333.013	331.943	333.781	253.9446Da/333.01349s	stable	stable	stable	0.000840069	0.000577707	1	12	0	13	34	98
966	254.054	negative	no	254.054	254.054	350.21	348.988	350.832	[('N-[(3-bromophenyl)methyl]-1-pentanamine**', '1.819', 'M-H_chebi', 'C12H18Br1N1')]	Class 3	stable	stable	0.000867596	0.000529456	4	7	0	5	95	61
967	254.917	negative	no	254.917	254.918	29.3975	27.1392	30.505	254.91726Da/29.39754	stable	stable	stable	0.00277212	0.00144692	2	2	17	76	41	39
968	254.942	negative	no	254.942	254.942	26.8964	24.4379	27.9922	254.94176Da/26.8964	Class 3	stable	stable	0.000636278	0.000480217	2	4	34	59	38	2
970	255.067	negative	no	255.066	255.067	352.623	351.783	353.392	[('isoliquiritigenin', 1.0), ('(2s)-liquiritigenin', 1.0), ('hydrangenol', 1.0), ('dihydrodaidzein', 1.0), ("(e)-2,4,4'-trihydroxychalcone", 1.0), ('(2s)-liquiritigenin', 1.0), ('2-dehydro-o-desmethylangolensin', 1.0)]	stable	stable	stable	0.000336156	0.000236965	2	5	0	40	21	6
971	255.135	negative	no	255.135	255.135	295.354	293.142	296.325	[('pulcherriminic acid', 1.0)]	Class 3	stable	stable	0.0003196	0.000236467	5	7	0	83	67	98
976	256.192	negative	no	256.192	256.192	491.102	490.461	491.707	[('n-lauroylglycine', 1.0)]	Class 2	Class 2	stable	0.0138773	0.00236485	50	50	17	51	8	50
979	256.939	negative	no	256.939	256.94	403.976	402.908	404.573	256.93933Da/403.97552	stable	stable	Class 3	0.000554266	0.000444255	2	2	5	31	37	20
981	257.08	negative	no	257.08	257.08	364.531	363.772	365.293	[('isopropyl beta-d-glucoside', 1.0)]	stable	stable	Class 3	0.00033455	0.000321307	0	18	45	16	80	37
982	257.082	negative	no	257.082	257.083	405.081	404.558	405.839	[('Guibourtinidol**', '1.341', 'M-H_lipid', 'C15H14O4'), ('Epidistenin**', '1.341', 'M-H_lipid', 'C15H14O4'), ('Apigeniflavan**', '1.341', 'M-H_lipid', 'C15H14O4'), ('Demethylvestitol**', '1.341', 'M-H_lipid', 'C15H14O4'), ('Davidigenin**', '1.341', 'M-H_lipid', 'C15H14O4'), ('Lunularic acid**', '1.341', 'M-H_lipid', 'C15H14O4')]	Class 3	Class 3	stable	8.50977e-05	8.35261e-05	0	2	0	37	71	58
983	257.195	negative	no	257.195	257.196	491.088	490.458	491.685	257.19547Da/491.08835s	stable	Class 2	Class 3	0.00739355	0.00212599	50	29	0	51	19	27
985	257.847	negative	no	257.846	257.847	515.903	479.945	565.529	257.84669Da/515.90253s	stable	stable	stable	9.36303e-05	0.000120517	1	3	0	91	61	17
986	258.936	negative	no	258.936	258.937	403.875	402.908	404.573	258.93644Da/403.87485s	stable	stable	Class 3	0.000314963	0.000232818	0	17	21	31	37	20
988	258.992	negative	no	258.991	258.993	251.6	248.744	255.118	[('caffeic acid 3-sulfate', 1.0), ('caffeic acid 4-sulfate', 1.0)]	stable	stable	stable	0.00103701	0.000674351	46	9	0	1	67	14
990	259.119	negative	no	259.119	259.119	280.019	272.811	313.063	[('glycerol tripropanoate', 1.0)]	stable	stable	stable	0.000167061	0.000134271	0	1	0	37	13	92
991	259.13	negative	no	259.13	259.13	188.778	142.806	197.712	[('l-gamma-glutamyl-l-isoleucine', 1.0), ('l-gamma-glutamyl-l-leucine', 1.0)]	Class 3	Class 3	stable	0.00206735	0.00124187	0	6	8	11	14	48
995	259.816	negative	no	259.816	259.816	545.34	504.68	572.541	259.81627Da/545.34009s	stable	stable	stable	0.000108604	0.000125898	2	4	0	38	97	79
996	260.024	negative	no	260.024	260.024	106.423	92.4733	120.951	[('2-methoxyacetaminophen sulfate', 1.0)]	stable	stable	stable	0.000222494	0.000231561	0	2	0	18	13	82
998	260.874	negative	no	260.873	260.874	29.6308	27.1392	30.7486	260.8737Da/29.63078s	stable	stable	stable	0.000446839	0.00049331	0	1	0	44	41	86
999	260.942	negative	no	260.942	260.942	26.9171	24.8716	28.3367	260.94174Da/26.91714s	stable	stable	stable	0.000100473	0.000160191	0	2	0	92	70	52
1000	261.008	negative	no	261.008	261.008	240.187	206.323	275.325	[('3-(3,5-dihydroxyphenyl)-1-propanoic acid sulphate', 1.0)]	stable	stable	stable	0.000500959	0.000387465	0	6	0	83	67	10
1001	261.027	negative	no	261.027	261.027	106.307	92.4005	116.03	[('4-[(1H-benzimidazol-2-ylthio)methyl]-2-thiazolamine**', '2.496', 'M-H_chebi', 'C11H10N4S2')]	Class 2	Class 2	Class 3	0.000705715	0.000485916	2	6	0	14	19	31
1003	261.089	negative	no	261.089	261.089	168.606	160.366	176.666	[('l-cis-cyclo(aspartylphenylalanyl)', 1.0)]	Class 3	Class 3	stable	0.00014434	0.000129338	0	3	0	5	8	10
1004	261.89	negative	no	261.889	261.89	336.974	335.686	338.222	261.88956Da/336.97406s	stable	stable	stable	0.000210109	0.000251699	0	4	0	64	21	56
1008	262.93	negative	no	262.93	262.931	26.3692	24.3105	27.5073	[('Dixanthogen**', '0.893', 'M-2H_Na_chebi', 'C6H10O2S4')]	stable	stable	stable	8.5999e-05	8.85149e-05	0	2	0	7	45	8
1009	263.023	negative	no	263.023	263.024	105.998	93.6727	116.03	[('3-methoxy-4-hydroxyphenylglycol sulfate', 1.0)]	Class 2	Class 2	Class 3	0.000285244	0.000212854	1	5	0	18	19	31
1010	263.023	negative	no	263.023	263.024	211.537	210.652	214.832	[('3-methoxy-4-hydroxyphenylglycol sulfate', 1.0)]	Class 2	Class 2	Class 2	0.000341015	0.000308069	3	8	0	29	16	83
1012	263.104	negative	no	263.103	263.104	257.951	255.14	261.074	[('phenylacetylglutamine', 1.0), ('alpha-n-phenylacetyl-l-glutamine', 1.0)]	stable	stable	stable	0.000444228	0.00039798	0	3	0	83	40	97
1013	263.133	negative	no	263.132	263.133	498.169	489.695	501.137	[('(3Z)-dodec-3-en-1-yl hydrogen sulfate**', '0.545', 'M-H_chebi', 'C12H24O4S1')]	Class 2	stable	stable	0.0036344	0.00200339	50	30	0	71	50	35
1014	263.887	negative	no	263.886	263.887	336.897	335.686	338.222	263.88659Da/336.89742s	stable	stable	stable	0.00018635	0.000125083	0	4	0	64	21	56
1015	263.931	negative	no	263.931	263.931	26.7832	24.3105	29.2787	263.931Da/26.78321s	stable	stable	stable	8.05149e-05	9.73206e-05	0	2	0	7	45	8
1016	264.088	negative	no	264.088	264.088	285.665	283.625	286.743	[('2-(2-phenylacetoxy)propionylglycine', 1.0)]	stable	stable	stable	0.00100027	0.00068681	2	1	35	69	8	32
1017	264.107	negative	no	264.107	264.108	257.949	255.14	260.301	264.10742Da/257.94875	stable	stable	stable	0.000644805	0.000469625	0	2	0	83	40	97
1018	264.928	negative	no	264.928	264.928	26.3643	24.3105	29.2787	264.92771Da/26.3643s	stable	stable	stable	6.57809e-05	7.84742e-05	0	2	0	7	45	8
1019	264.964	negative	no	264.963	264.964	26.3156	24.734	27.4702	264.96351Da/26.31555s	stable	stable	stable	9.96006e-05	9.51089e-05	0	3	0	58	22	76
1021	265.091	negative	no	265.091	265.092	285.814	284.311	286.393	265.09139Da/285.8143	stable	stable	stable	0.00238964	0.00138737	10	2	50	69	8	49
1022	265.12	negative	no	265.12	265.12	311.293	309.981	311.879	[('phenylalanyl-threonine', 1.0), ('n5-(4-methoxybenzyl)glutamine', 1.0), ('gamma-glutamyltyramine', 1.0)]	Class 3	stable	stable	0.000243053	0.000259557	3	2	0	14	1	98
1023	265.148	negative	no	265.148	265.149	533.681	509.953	553.709	[('dodecyl hydrogen sulfate**', '1.751', 'M-H_chebi', 'C12H26O4S1')]	Class 3	stable	stable	0.000851127	0.000554352	27	6	2	45	27	66
1024	265.928	negative	no	265.928	265.928	26.7583	24.3105	27.7725	265.92811Da/26.75833s	stable	stable	stable	7.68029e-05	9.23074e-05	0	2	0	7	45	8
1025	265.976	negative	no	265.976	265.977	294.175	293.618	294.854	[('N-3,5-dichloro-4-hydroxyphenyl-1,4-benzoquinone imine**', '4.697', 'M-H_chebi', 'C12H7Cl2N1O2'), ('2,6-dichloroindophenol**', '4.697', 'M-H_chebi', 'C12H7Cl2N1O2')]	Class 2	Class 2	Class 2	7.65333e-05	9.06854e-05	0	2	0	80	11	32
1026	266.151	negative	no	266.151	266.152	545.505	527.113	553.084	[("4'-dihydroabscisic acid", 0.8915065391457075)]	Class 2	Class 2	stable	0.00400074	0.00153638	2	1	0	36	50	41
1027	266.804	negative	no	266.804	266.804	558.562	538.32	576.153	266.80414Da/558.56241s	stable	stable	stable	8.75633e-05	0.000104784	1	4	0	32	52	34
1028	266.804	negative	no	266.804	266.805	30.946	29.01	31.8263	266.80427Da/30.94597s	stable	Class 3	Class 2	0.0008642	0.000554115	0	3	39	47	84	22
1029	266.925	negative	no	266.925	266.925	26.7544	24.3105	28.0034	[('5,6-dichloro-1H-imidazo[4,5-b]pyrazine-2-carboxylic acid**', '2.880', 'Cl_chebi', 'C6H2Cl2N4O2')]	stable	stable	stable	0.000107696	0.000107052	0	2	0	7	70	8
1030	266.947	negative	no	266.946	266.947	57.3817	46.9543	62.6581	266.94667Da/57.38172	Class 3	Class 2	Class 3	0.000127799	0.000110547	0	4	0	20	21	37
1031	266.952	negative	no	266.952	266.953	25.3502	24.8912	26.6555	266.95247Da/25.35017	Class 2	Class 2	Class 2	0.000869766	0.000540535	0	6	0	25	22	2
1032	267.073	negative	no	267.072	267.073	40.1029	37.1872	42.8578	[('inosine', 1.0), ('allopurinol riboside', 1.0), ('arabinosylhypoxanthine', 1.0)]	Class 2	Class 2	Class 3	0.000616	0.00056294	0	1	0	7	8	13
1033	267.074	negative	no	267.074	267.074	147.178	135.668	157.677	[('inosine', 1.0), ('arabinosylhypoxanthine', 1.0)]	Class 2	Class 2	stable	0.00121209	0.00074149	3	49	41	11	50	27
1035	267.124	negative	no	267.124	267.124	453.957	453.407	454.673	[('3-carboxy-4-methyl-5-pentyl-2-furanpropanoic acid', 1.0), ('ripazepam', 1.0)]	Class 3	stable	stable	0.000214808	0.000149124	2	6	0	14	34	85
1036	267.144	negative	no	267.144	267.144	545.57	527.113	553.084	267.14393Da/545.57034	Class 2	Class 2	stable	0.00351284	0.00152319	17	3	0	61	50	41
1039	268.801	negative	no	268.801	268.802	30.9508	29.1396	31.8263	268.80133Da/30.95084s	stable	Class 3	Class 2	0.00191943	0.00145156	0	2	27	47	84	22
1041	269.046	negative	no	269.046	269.046	384.515	383.206	385.345	[('5,6,7-trihydroxy-2-phenyl-4h-chromen-4-one', 1.0), ('genistein', 1.0), ('apigenin', 1.0), ("3'-hydroxydaidzein", 1.0), ("2'-hydroxydaidzein", 1.0), ('sulphuretin', 1.0), ("3'-hydroxydaidzein", 1.0), ('6-hydroxydaidzein', 1.0), ('norizalpinin', 1.0)]	stable	stable	stable	0.000815702	0.000456563	20	6	0	40	95	42
1042	269.151	negative	no	269.151	269.151	324.876	323.204	325.581	[('fatty acid 16:4**', '2.724', 'M-2H_Na_chebi', 'C16H24O2')]	stable	stable	stable	0.00018291	0.000166484	0	4	0	83	1	10
1044	270.02	negative	no	270.02	270.021	326.709	325.471	327.608	[('8,9-dichloro-1,2,3,4,4a,6-hexahydropyrazino[1,2-a]quinoxalin-5-one**', '1.085', 'M-H_chebi', 'C11H11Cl2N3O1'), ('muzolimine**', '1.085', 'M-H_chebi', 'C11H11Cl2N3O1')]	Class 2	Class 1	Class 1	0.000144345	0.000128273	0	3	0	4	18	25
1045	270.049	negative	no	270.049	270.049	384.62	384.399	385.345	[('2,2,2-trifluoro-N-(5-oxo-1-phenyl-4H-pyrazol-3-yl)acetamide**', '1.712', 'M-H_chebi', 'C11H8F3N3O2')]	stable	stable	stable	0.000466967	0.000313091	6	8	0	89	95	59
1046	270.135	negative	no	270.135	270.135	346.987	346.52	347.568	270.13502Da/346.98676s	stable	stable	stable	0.000499481	0.000325375	18	6	0	40	1	35
1047	270.154	negative	no	270.154	270.154	324.889	324.191	326.179	270.15431Da/324.88913	stable	stable	stable	0.000204645	0.000214648	2	7	0	18	1	80
1048	270.208	negative	no	270.207	270.208	512.337	511.239	512.988	[('tridecanoylglycine', 1.0)]	Class 2	Class 3	Class 3	0.00106565	0.000679386	3	6	0	82	87	17
1049	270.798	negative	no	270.798	270.8	30.9698	28.6387	31.8263	270.79838Da/30.96984s	stable	Class 3	Class 2	0.00169158	0.00113136	0	2	27	47	84	22
1050	270.846	negative	no	270.845	270.846	31.5391	29.5624	32.2075	270.84571Da/31.53914s	Class 3	Class 3	Class 2	0.000369437	0.000329266	0	24	9	70	25	99
1051	270.891	negative	no	270.891	270.891	29.257	27.5996	30.7486	270.89122Da/29.25697s	Class 3	Class 2	stable	0.000263064	0.000219954	0	4	0	88	2	57
1052	270.912	negative	no	270.912	270.913	25.8006	25.0901	26.3243	270.91243Da/25.8006s	Class 3	Class 3	Class 3	0.000130303	9.75343e-05	0	5	0	25	49	38
1054	271.029	negative	no	271.028	271.029	280.44	280.092	281.164	[('[(5-hydroxy-2-methyl-2H-chromen-2-yl)methoxy]sulfonic acid**', '1.164', 'M-H_hmdb', 'C11H12O6S1'), ('[1-(4-methoxy-1-benzofuran-5-yl)ethoxy]sulfonic acid**', '1.164', 'M-H_hmdb', 'C11H12O6S1'), ('[2-methoxy-4-(3-oxobut-1-en-1-yl)phenyl]oxidanesulfonic acid**', '1.164', 'M-H_hmdb', 'C11H12O6S1')]	Class 3	Class 3	Class 3	0.000123624	0.000126058	2	5	0	76	29	55
1055	271.062	negative	no	271.061	271.062	382.632	375	391.075	[('chalconaringenin', 1.0), ('p-coumaroyltriacetic acid lactone', 1.0), ('chalconaringenin', 1.0)]	Class 3	Class 3	stable	0.000633107	0.000471375	4	2	0	40	69	72
1056	272.795	negative	no	272.795	272.796	30.9485	28.6387	31.5875	272.79544Da/30.94851s	Class 3	Class 2	Class 2	0.000918731	0.000746488	0	0	1	32	63	4
1057	272.813	negative	no	272.813	272.813	30.8985	28.9417	31.5875	272.81301Da/30.89853s	Class 3	Class 3	Class 2	0.000602122	0.000585204	0	5	12	12	60	4
1058	272.843	negative	no	272.843	272.843	31.5116	29.5624	32.1804	272.84283Da/31.51162s	stable	Class 3	Class 3	0.000165166	0.000188227	0	14	1	67	92	12
1059	272.959	negative	no	272.958	272.959	26.9402	24.4379	28.108	272.95927Da/26.94021s	stable	stable	stable	0.000213337	0.000246689	0	2	0	7	70	40
1060	273.008	negative	no	273.008	273.008	255.355	251.948	268.367	[('ferulic acid 4-sulfate', 1.0), ('isoferulic acid 3-sulfate', 1.0)]	Class 3	Class 3	Class 3	0.000457837	0.000349077	1	8	0	5	78	28
1061	273.008	negative	no	273.008	273.008	297.928	296.614	298.935	[('ferulic acid 4-sulfate', 1.0), ('isoferulic acid 3-sulfate', 1.0)]	stable	stable	Class 3	0.0088943	0.00257462	50	50	0	83	54	27
1062	273.065	negative	no	273.065	273.065	171.241	168.253	180.01	[('felbamate', 1.0)]	Class 2	stable	stable	0.00783295	0.00247269	14	7	0	11	21	86
1063	273.146	negative	no	273.146	273.146	239.913	238.77	240.955	[('1,4,5-trihydroxy-&Delta;<sup>2,3</sup>-protoilludene**', '4.840', 'M-2H_Na_meta', 'C15H24O3'), ('illudol**', '4.840', 'M-2H_Na_meta', 'C15H24O3'), ('isotrichodiol**', '4.840', 'M-2H_Na_meta', 'C15H24O3'), ('3-hydroxylubimin**', '4.840', 'M-2H_Na_meta', 'C15H24O3'), ('1-Hydroxyepiacorone**', '4.840', 'M-2H_Na_hmdb', 'C15H24O3'), ('Acorusdiol**', '4.840', 'M-2H_Na_hmdb', 'C15H24O3'), ('3(4-&gt;5…	stable	Class 3	stable	0.00826333	0.00272146	24	10	0	18	71	62
1066	273.96	negative	no	273.96	273.96	26.9351	24.4379	28.108	273.96008Da/26.93511	stable	stable	stable	0.000126788	0.000140522	0	2	0	7	70	40
1067	274.003	negative	no	274.003	274.003	185.259	183.135	191.537	274.00305Da/185.25856	Class 2	Class 3	stable	0.000945318	0.000768335	0	1	0	11	19	92
1068	274.105	negative	no	274.104	274.105	37.3623	34.5925	41.9017	[('gamma-Glu-Gln**', '0.422', 'M-H_chebi', 'C10H17N3O6'), ('N(2)-succinyl-L-citrulline**', '0.422', 'M-H_chebi', 'C10H17N3O6'), ('Ala-Ala-Asp**', '0.422', 'M-H_chebi', 'C10H17N3O6'), ('Gln-Glu**', '0.422', 'M-H_chebi', 'C10H17N3O6'), ('Glu-Gln**', '0.422', 'M-H_chebi', 'C10H17N3O6')]	Class 2	Class 3	Class 3	0.000160337	0.000171187	0	7	3	20	81	13
1069	274.957	negative	no	274.957	274.958	26.9377	22.7796	28.108	[('thiram', 1.0)]	stable	stable	stable	0.000204246	0.000215171	0	2	0	7	70	40
1070	274.963	negative	no	274.963	274.963	26.9402	24.8716	28.6797	[('S-(4-bromophenyl)-L-cysteine**', '3.874', 'M-H_meta', 'C9H10N1O2S1Br1')]	stable	stable	stable	0.000174281	0.000172367	0	3	0	7	70	40
1071	275.022	negative	no	275.021	275.023	250.615	248.585	252.898	[("5-(4-acetoxy-1-butynyl)-2,2'-bithiophene", 1.0), ('dihydroferulic acid 4-sulfate', 1.0)]	Class 3	stable	stable	0.000651937	0.000600323	1	4	0	65	71	67
1072	275.024	negative	no	275.023	275.024	250.214	249.258	251.523	[('dihydroferulic acid 4-sulfate', 1.0), ('gw 9662', 1.0)]	Class 3	Class 2	Class 2	0.00018772	0.000130027	3	1	0	5	29	14
1076	275.957	negative	no	275.957	275.958	26.9377	24.4379	28.6797	275.95717Da/26.93766s	stable	stable	stable	0.000164253	0.000154295	0	2	0	7	70	40
1077	276.833	negative	no	276.833	276.833	30.875	29.6477	31.5875	276.83312Da/30.87499s	stable	Class 2	Class 2	0.000169956	0.000166799	1	3	34	12	23	22
1078	276.954	negative	no	276.954	276.954	27.1495	24.8716	28.108	276.95429Da/27.14945s	stable	stable	stable	0.0001142	0.000129174	0	2	0	7	70	40
1079	277.108	negative	no	277.108	277.109	365.624	365.281	365.791	[('marasmone', 1.0), ('11-hydroxy-12-methoxydihydrokawain', 1.0), ('zinnolide', 1.0)]	Class 1	stable	stable	0.000580523	0.000413574	3	6	39	64	98	61
1080	277.12	negative	no	277.119	277.12	192.965	191.197	224.765	[('tyrosyl-proline', 1.0), ('oxadixyl', 1.0)]	Class 2	stable	stable	0.0064257	0.00297552	3	3	28	11	16	48
1081	277.145	negative	no	277.144	277.145	514.489	507.614	515.772	[('emmotin a', 1.0), ('alhpa-tocopheronolactone', 1.0), ('2-ethylhexyl phthalate', 1.0), ('monoethylhexyl phthalic acid', 1.0)]	stable	stable	stable	0.000208173	0.000169913	0	5	0	40	84	14
1085	277.861	negative	no	277.861	277.861	80.2524	74.265	84.5011	277.8612Da/80.25238	Class 2	Class 2	Class 3	0.000184203	0.000184656	0	1	0	43	50	41
1086	277.977	negative	no	277.976	277.977	255.942	253.869	257.328	[('barban**', '4.101', 'M-2H_Na_chebi', 'C11H9Cl2N1O2')]	Class 3	Class 3	stable	0.00033187	0.000321584	0	3	0	27	8	33
1087	278.83	negative	no	278.83	278.83	30.8113	29.6477	31.5875	278.83018Da/30.81131s	stable	Class 2	Class 1	0.000241514	0.000184715	1	2	0	73	23	22
1088	278.908	negative	no	278.908	278.908	26.3307	24.4379	28.6797	278.90805Da/26.33073s	stable	stable	stable	0.000120793	0.00010271	0	1	0	0	31	8
1090	278.994	negative	no	278.994	278.995	326.668	325.471	327.608	[('6-sulfoquinovose**', '0.213', 'Cl_chebi', 'C6H12O8S1'), ('6-deoxy-6-sulfo-D-fructofuranose**', '0.213', 'Cl_chebi', 'C6H12O8S1')]	Class 2	Class 2	Class 2	9.66384e-05	0.000117131	0	1	0	49	82	38
1094	279.099	negative	no	279.099	279.099	189.292	187.464	216.352	[('levosimendan', 1.0)]	Class 2	Class 2	stable	0.00148576	0.000998619	0	3	0	11	87	68
1095	279.128	negative	no	279.127	279.128	453.746	436.263	455.674	[('rhombifoline', 1.0)]	stable	Class 2	Class 2	0.00358615	0.00165078	48	8	4	72	50	86
1096	279.164	negative	no	279.164	279.164	563.662	540.675	599.529	[('1-(3-chlorophenyl)-4-hexylpiperazine**', '0.128', 'M-H_chebi', 'C16H25Cl1N2')]	Class 2	stable	stable	0.00960845	0.00320975	50	18	0	71	16	89
1099	279.858	negative	no	279.858	279.858	80.2143	74.5641	83.995	279.85825Da/80.21426s	Class 2	Class 2	Class 3	0.00018818	0.000227765	2	3	0	43	50	25
1100	279.908	negative	no	279.908	279.909	26.3215	24.3105	27.7725	279.90837Da/26.32146s	stable	stable	stable	8.00593e-05	8.73663e-05	0	1	0	0	45	8
1101	279.908	negative	no	279.908	279.909	58.9741	55.9139	62.837	279.90825Da/58.97408s	Class 2	Class 2	stable	0.00220286	0.00112505	1	2	0	54	19	11
1102	279.992	negative	no	279.992	279.992	326.689	325.471	327.608	[('2-(2,4-dichlorophenoxy)-N-(2-furanylmethyl)acetamide**', '4.816', 'M-H-H2O_chebi', 'C13H11Cl2N1O3'), ('Benoxacor**', '1.946', 'M-2H_Na_chebi', 'C11H11Cl2N1O2'), ('M2**', '1.946', 'M-2H_Na_chebi', 'C11H11Cl2N1O2')]	Class 3	Class 2	Class 2	9.34868e-05	8.6211e-05	0	1	0	93	86	19
1103	280.827	negative	no	280.827	280.827	30.5659	29.6477	31.5875	280.82725Da/30.56587s	stable	Class 2	Class 2	0.00037125	0.000342448	0	3	22	73	25	22
1106	280.899	negative	no	280.899	280.899	521.782	488.729	568.935	280.89866Da/521.78232	stable	stable	stable	0.000171993	0.00014803	0	4	4	52	97	67
1107	280.905	negative	no	280.905	280.906	26.3256	22.1908	28.0873	280.90523Da/26.32563s	stable	stable	stable	9.11258e-05	0.000114398	0	0	0	0	31	8
1108	280.941	negative	no	280.941	280.942	26.2987	24.4379	28.3367	280.94109Da/26.29872s	stable	stable	stable	0.000124552	9.50212e-05	0	2	0	58	79	76
1109	280.962	negative	no	280.962	280.963	154.516	136.852	166.423	280.96237Da/154.51645s	Class 3	Class 3	Class 3	0.00286154	0.00164381	0	8	0	5	14	60
1110	280.975	negative	no	280.974	280.975	256.012	253.869	257.487	[('6-bromo-2-(1-pyrrolidinyl)-1,3-benzothiazole**', '4.199', 'M-H_chebi', 'C11H11Br1N2S1')]	Class 2	Class 3	stable	0.000401874	0.000312747	0	4	0	36	8	63
1115	281.886	negative	no	281.886	281.887	78.7294	72.8732	86.064	281.88632Da/78.72942s	stable	stable	stable	0.000121315	0.000121837	1	0	0	17	71	36
1116	281.905	negative	no	281.905	281.906	58.9534	24.3105	61.6652	281.90529Da/58.95341s	Class 2	Class 2	stable	0.00253842	0.00131395	0	7	7	78	19	11
1119	282.778	negative	no	282.778	282.778	31.152	29.5043	32.1804	282.7782Da/31.152s	Class 2	Class 2	Class 2	0.000125484	0.000146515	0	1	0	20	25	4
1121	282.892	negative	no	282.892	282.892	326.693	325.545	328.357	282.89211Da/326.6926s	Class 2	Class 2	Class 2	0.000406991	0.000271536	3	11	0	89	36	67
1122	282.902	negative	no	282.902	282.903	26.3156	24.3105	27.7725	282.90228Da/26.31555s	stable	stable	stable	0.000120172	0.00011119	0	2	0	20	31	84
1124	282.937	negative	no	282.936	282.937	26.8961	24.4379	27.9922	[('4-bromoisophthalate**', '4.530', 'Cl_meta', 'C8H9O4Br1')]	Class 3	stable	stable	0.000321398	0.000182147	2	2	5	59	38	2
1125	283.069	negative	no	283.068	283.069	161.179	159.979	169.521	[('xanthosine', 1.0)]	Class 3	Class 2	stable	0.00185189	0.000945005	0	39	37	11	16	93
1126	283.083	negative	no	283.083	283.083	286.486	284.898	287.508	[('p-cresol glucuronide', 1.0)]	stable	Class 3	stable	0.00139888	0.00105688	0	3	0	83	40	97
1127	283.119	negative	no	283.119	283.119	342.716	341.633	365.119	[('2-phenylethyl beta-d-glucopyranoside', 1.0)]	stable	stable	stable	0.000624107	0.000443534	8	17	0	61	34	74
1129	283.883	negative	no	283.883	283.884	78.7294	72.8732	86.064	283.88338Da/78.72942s	stable	stable	stable	0.000120988	0.000100003	0	1	0	17	71	36
1130	283.914	negative	no	283.914	283.915	59.3603	57.1859	62.837	283.91431Da/59.36032s	Class 3	Class 3	stable	0.00114628	0.000681722	0	3	0	54	19	11
1131	284.775	negative	no	284.775	284.776	31.0315	29.5043	32.1804	284.77535Da/31.03155s	stable	Class 3	Class 2	0.000449453	0.000445476	1	2	7	30	55	4
1133	284.89	negative	no	284.89	284.89	326.743	325.545	328.357	284.89008Da/326.74332s	Class 2	Class 2	Class 2	0.000317822	0.00024362	1	12	0	89	36	68
1134	284.925	negative	no	284.925	284.925	29.6602	22.1908	30.4448	[('(2R)-O-phospho-3-sulfolactic acid**', '2.232', 'Cl_chebi', 'C3H7O91')]	stable	stable	stable	0.000104559	0.000104042	0	5	0	30	26	13
1136	285.114	negative	no	285.113	285.114	328.409	327.478	328.991	[('2-o-methylangolensin', 1.0), ('4-o-methylangolensin', 1.0), ('sugiresinol', 1.0), ("4-hydroxy-3,5,4'-trimethoxystilbene", 1.0)]	Class 3	stable	stable	0.000456534	0.000437921	0	2	2	5	89	17
1137	285.114	negative	no	285.114	285.114	377.428	376.783	377.804	[("4-hydroxy-3,5,4'-trimethoxystilbene", 1.0), ('2-o-methylangolensin', 1.0), ('4-o-methylangolensin', 1.0), ('sugiresinol', 1.0)]	stable	Class 3	stable	0.00139567	0.000785006	1	31	19	96	89	75
1138	285.171	negative	no	285.171	285.171	267.768	265.405	269.586	[('trichotriol**', '1.335', 'M-H_meta', 'C15H26O5')]	stable	stable	stable	0.000133802	0.000135799	0	2	0	64	98	92
1140	286.772	negative	no	286.772	286.773	31.1147	29.5043	32.1804	286.77243Da/31.11466s	Class 3	Class 2	Class 2	0.000336371	0.000350411	1	2	0	17	25	4
1141	287.023	negative	no	287.023	287.024	270.854	239.45	273.367	[("5'-(3',4'-dihydroxyphenyl)-gamma-valerolactone sulfate", 1.0)]	stable	stable	stable	0.000215691	0.000177647	1	0	0	64	13	92
1143	288.027	negative	no	288.027	288.027	270.865	269.253	272.363	[('n-salicyloylaspartic acid', 1.0), ('n-pyruvoyl-5-methoxy-3-hydroxyanthranilate', 1.0)]	stable	stable	stable	0.000256322	0.000228562	0	0	0	64	13	92
1147	288.877	negative	no	288.877	288.878	63.4789	59.0836	67.6167	288.87717Da/63.4789s	Class 3	Class 2	stable	0.000924986	0.000568512	1	6	0	11	16	54
1149	288.937	negative	no	288.936	288.937	26.8964	24.4379	28.0034	288.93687Da/26.8964	stable	stable	stable	0.000466021	0.00043571	0	2	0	0	93	40
1153	289.937	negative	no	289.937	289.938	59.3318	57.4664	62.1995	289.93702Da/59.33177	Class 2	Class 2	stable	0.00302421	0.00158161	0	49	44	7	24	68
1154	289.938	negative	no	289.938	289.938	26.8964	24.4379	28.0034	[('3-[(2,4-dichlorophenyl)methylthio]-1,2,4-thiadiazol-5-amine**', '1.698', 'M-H_chebi', 'C9H7Cl2N3S2')]	stable	stable	stable	0.000407234	0.000390234	0	2	0	0	93	40
1156	290.089	negative	no	290.088	290.089	43.8388	39.3679	65.6338	[('sarmentosin epoxide', 1.0)]	Class 3	Class 3	stable	0.00222948	0.000993314	0	2	0	28	13	15
1158	290.874	negative	no	290.874	290.875	63.3164	29.0713	67.6167	290.87422Da/63.31643s	Class 2	Class 2	stable	0.000745552	0.000546564	1	5	11	11	62	54
1159	290.934	negative	no	290.934	290.935	26.8964	24.4379	28.0034	290.93441Da/26.8964s	stable	stable	stable	0.00040235	0.000530993	0	2	0	0	93	40
1160	290.941	negative	no	290.94	290.941	26.8964	24.4379	28.0034	290.94067Da/26.8964	stable	stable	stable	0.000745728	0.000669069	0	2	0	0	93	40
1162	291.938	negative	no	291.938	291.938	26.8964	24.4379	28.0034	291.93772Da/26.89641s	stable	stable	stable	0.000511466	0.000614047	0	2	0	0	93	40
1164	292.818	negative	no	292.818	292.819	30.9387	28.6387	31.6056	292.81834Da/30.93867s	stable	stable	stable	0.000184873	0.000168779	0	6	11	56	41	50
1165	292.828	negative	no	292.827	292.828	30.9917	29.1396	31.7509	292.82775Da/30.99173s	stable	Class 2	Class 2	0.000218155	0.00027641	0	2	0	96	63	4
1166	292.93	negative	no	292.929	292.93	26.8964	24.4379	28.0873	292.92973Da/26.8964s	stable	stable	stable	0.00036115	0.000303079	0	2	0	0	93	40
1167	292.958	negative	no	292.958	292.959	26.1893	25.4135	27.4702	292.95842Da/26.1893	Class 3	stable	stable	9.20431e-05	0.000105505	0	2	0	2	22	76
1168	293.115	negative	no	293.114	293.115	220.199	218.217	238.955	[('demethyldehydrophos**', '0.183', 'M-H_meta', 'C10H20N3O5P1')]	Class 3	Class 3	Class 3	0.000113406	0.000116647	0	4	0	5	67	31
1169	293.143	negative	no	293.143	293.144	478.122	475.774	479.713	[('1-[[4-(dimethylamino)phenyl]methylideneamino]-3-(3-methoxypropyl)thiourea**', '1.305', 'M-H_chebi', 'C14H22N41')]	Class 2	Class 2	stable	0.00286649	0.00179183	1	33	50	73	69	33
1170	293.151	negative	no	293.151	293.151	244.218	240.432	246.14	[('isoleucyl-tyrosine', 1.0), ('leucyl-tyrosine', 1.0), ('tyrosyl-isoleucine', 1.0), ('tyrosyl-leucine', 1.0)]	Class 3	Class 3	stable	0.00186843	0.00107758	0	20	47	29	78	50
1171	293.18	negative	no	293.179	293.18	476.371	444.204	485.853	[('Sodium Tetradecyl Sulfate**', '1.618', 'M-H_hmdb', 'C14H30O4S1')]	Class 2	stable	stable	0.000135331	0.000129208	0	4	0	11	71	56
1175	293.972	negative	no	293.972	293.972	212.243	211.154	215.268	[('Chlomethoxyfen**', '3.163', 'M-H-H2O_chebi', 'C13H9Cl2N1O4')]	Class 2	Class 3	stable	0.000433247	0.000345659	0	1	0	11	19	97
1176	293.972	negative	no	293.971	293.972	294.101	293.054	294.882	[('Chlomethoxyfen**', '3.323', 'M-H-H2O_chebi', 'C13H9Cl2N1O4'), ('Dichlozoline**', '3.311', 'M-2H_Na_chebi', 'C11H9Cl2N1O3')]	Class 3	Class 3	Class 3	0.00136137	0.000845713	1	7	0	5	1	37
1177	294.056	negative	no	294.056	294.056	336.085	334.919	336.655	[('acetylsulfamethoxazole', 1.0), ('n4-acetylsulfamethoxazole', 1.0)]	Class 2	Class 2	Class 1	0.00224723	0.00109597	29	4	50	38	43	79
1178	294.183	negative	no	294.183	294.183	476.371	475.185	482.226	[('gamma-sanshool**', '2.328', 'M-2H_Na_chebi', 'C18H27N1O1'), ('gamma-sanshool**', '3.294', 'M-2H_Na_lipid', 'C18H27N1O1'), ('N-Isobutyl-2,4,8,10,12-tetradecapentaenamide**', '3.296', 'M-2H_Na_hmdb', 'C18H27N1O1'), ('N-Isobutyl-2,4,8,10,12-tetradecapentaenamide**', '3.298', 'M-2H_Na_lipid', 'C18H27N1O1')]	Class 2	Class 3	Class 2	0.000298268	0.000239059	1	3	0	71	71	56
1181	294.815	negative	no	294.815	294.816	30.9239	28.6387	31.6056	294.81538Da/30.92393s	stable	stable	stable	0.000285422	0.000207146	0	14	33	56	39	50
1182	294.825	negative	no	294.824	294.825	30.9867	29.1866	32.1804	294.82481Da/30.98673s	Class 3	Class 3	Class 2	0.000303508	0.000237828	1	22	2	20	69	4
1183	294.886	negative	no	294.885	294.886	26.8285	24.4379	27.9922	294.88562Da/26.82851s	stable	stable	stable	0.000118351	0.000112599	0	1	0	77	90	8
1185	294.893	negative	no	294.893	294.893	28.3062	26.7566	29.1216	294.89324Da/28.30617s	stable	stable	Class 2	0.0042519	0.00117114	8	6	50	81	60	12
1186	294.895	negative	no	294.894	294.895	57.3227	29.7024	59.7599	294.89463Da/57.32265s	Class 2	Class 2	Class 2	0.000173173	0.000170371	1	2	0	20	6	71
1187	294.927	negative	no	294.927	294.927	27.3423	24.8716	28.3367	294.92725Da/27.34229s	stable	stable	stable	0.000121361	0.000102216	1	3	0	3	83	6
1188	294.954	negative	no	294.953	294.954	29.1955	26.6171	30.2207	294.95385Da/29.19545s	stable	stable	stable	0.00103209	0.000848334	11	1	0	7	32	36
1189	294.978	negative	no	294.978	294.978	204.295	202.519	209.904	[('2-(4-chlorophenyl)-6-(methylthio)-4-oxo-2,3-dihydro-1,3-thiazine-5-carbonitrile**', '4.581', 'M-H_chebi', 'C12H9Cl1N22')]	Class 2	Class 2	stable	0.00127923	0.000717791	0	3	0	11	16	10
1190	295.029	negative	no	295.028	295.029	319.547	318.468	319.871	[('{[(3E)-4-(1-oxo-1H-isochromen-3-yl)but-3-en-2-yl]oxy}sulfonic acid**', '1.205', 'M-H_hmdb', 'C13H12O6S1'), ('{[(3E)-4-(1-oxo-1H-isochromen-3-yl)but-3-en-1-yl]oxy}sulfonic acid**', '1.205', 'M-H_hmdb', 'C13H12O6S1')]	Class 2	Class 2	Class 2	0.00135845	0.000884172	1	45	50	75	50	72
1192	295.13	negative	no	295.13	295.131	271.681	269.253	272.964	[('8-[2-[[5-(hydroxymethyl)-2-furanyl]methylidene]hydrazinyl]-8-oxooctanoic acid**', '2.013', 'M-H_chebi', 'C14H20N2O5')]	stable	Class 3	Class 2	0.00012793	0.000130918	0	2	0	83	86	21
1193	295.14	negative	no	295.14	295.14	238.343	234.697	239.594	[('Mevalonic acid**', '1.303', '2M-H_lipid', 'C6H12O4'), ('Ala-Gln-Pro**', '1.210', 'M-H-H2O_chebi', 'C13H22N4O5'), ('dapdiamide B zwitterion**', '1.210', 'M-H-H2O_chebi', 'C13H22N4O5'), ('dapdiamide C zwitterion**', '1.210', 'M-H-H2O_chebi', 'C13H22N4O5'), ('dapdiamide B**', '1.210', 'M-H-H2O_chebi', 'C13H22N4O5'), ('dapdiamide C**', '1.210', 'M-H-H2O_chebi', 'C13H22N4O5'), ('Mevalonic acid**', …	Class 2	Class 2	stable	0.000196904	0.000181254	0	2	0	29	81	96
1194	295.159	negative	no	295.158	295.159	551.893	547.74	560.172	[('ropinirole', 1.0)]	Class 2	stable	stable	0.0050894	0.00196238	50	6	11	29	87	43
1196	295.887	negative	no	295.887	295.887	333.118	331.955	334.031	295.88705Da/333.11783s	stable	stable	stable	0.00103898	0.000690593	3	46	0	13	34	36
1197	295.889	negative	no	295.889	295.889	26.4486	25.0782	26.9956	295.88897Da/26.44859s	stable	stable	stable	8.09921e-05	8.5179e-05	0	2	0	99	90	9
1198	295.892	negative	no	295.892	295.893	57.3519	46.6183	62.1712	295.89243Da/57.3519s	Class 2	Class 2	Class 2	0.000162764	0.000123891	0	2	0	98	30	88
1199	295.954	negative	no	295.954	295.955	29.1725	27.5012	29.7024	295.95426Da/29.17252	Class 2	Class 2	Class 1	0.000111037	0.00012815	1	4	1	20	43	94
1204	296.812	negative	no	296.812	296.813	30.9744	26.8116	31.6056	296.81238Da/30.97444s	stable	Class 3	Class 2	0.000158105	0.000176305	0	0	0	56	47	4
1205	296.86	negative	no	296.86	296.86	31.0702	29.1301	31.8321	296.8599Da/31.07021s	stable	stable	Class 2	0.000231107	0.000264048	1	6	0	5	2	37
1206	296.883	negative	no	296.882	296.883	26.7904	24.4379	58.5152	296.8826Da/26.79043s	stable	stable	stable	0.000137359	0.000125924	0	1	0	77	90	8
1207	296.891	negative	no	296.89	296.891	30.2111	27.8114	59.5063	296.89076Da/30.21109	stable	stable	stable	0.00052976	0.000444104	1	6	38	32	96	67
1208	296.951	negative	no	296.95	296.951	256.031	253.869	257.54	296.95073Da/256.03125	Class 3	Class 3	stable	0.000316396	0.000347619	0	4	0	27	8	63
1209	296.951	negative	no	296.951	296.952	29.2073	27.4167	30.2207	296.95145Da/29.20729	stable	stable	Class 3	0.000246104	0.000261001	0	2	0	54	55	36
1211	297.065	negative	no	297.065	297.066	165.804	160.51	167.667	[('6-(3-chloroanilino)-9-ethyl-2-purinecarbonitrile**', '1.053', 'M-H_chebi', 'C14H11Cl1N6')]	Class 2	Class 2	stable	0.000374729	0.000271415	0	7	37	95	91	41
1212	297.114	negative	no	297.113	297.114	392.837	391.819	393.767	[('enterolactone', 1.0), ("7,4'-dimethoxy-6-c-methylflavanone", 1.0)]	stable	stable	stable	0.000148054	0.000141303	0	0	0	64	34	69
1213	297.117	negative	no	297.117	297.117	429.783	428.789	430.707	[("4'-n-desmethylolanzapine", 1.0)]	stable	Class 2	Class 2	0.0182078	0.00275698	50	50	0	72	20	35
1214	297.153	negative	no	297.153	297.154	551.56	530.633	580.165	297.15328Da/551.55951s	Class 1	stable	stable	0.00152497	0.0011188	49	16	0	16	4	64
1215	297.866	negative	no	297.866	297.866	264.05	237.203	265.917	297.86635Da/264.05017s	stable	Class 3	stable	0.000113344	0.000127357	0	1	0	5	11	14
1216	297.878	negative	no	297.878	297.879	26.8964	26.2967	26.9306	297.87848Da/26.8964s	stable	stable	stable	8.19017e-05	9.21123e-05	3	0	0	5	54	96
1217	297.884	negative	no	297.884	297.884	333.126	331.989	334.031	297.88409Da/333.1256s	stable	stable	stable	0.00068657	0.000418614	3	29	0	40	34	82
1218	297.889	negative	no	297.889	297.89	57.447	48.8954	60.4411	297.88946Da/57.44703s	Class 2	Class 2	Class 2	0.000128484	0.000151796	2	12	0	90	6	88
1219	297.947	negative	no	297.947	297.947	294.134	292.401	295.057	297.94713Da/294.13432s	Class 1	Class 1	Class 1	0.000108896	0.00011028	1	3	0	24	28	64
1220	298.117	negative	no	298.117	298.117	392.773	392.167	393.576	[('<i>N</i>-(4-nitrophenyl)validamine**', '0.152', 'M-H_meta', 'C13H18N2O6')]	Class 3	stable	stable	0.000197417	0.000155081	1	2	0	13	34	82
1221	298.157	negative	no	298.156	298.157	548.863	545.358	555.976	[('butacarb', 1.0), ('tramadol', 1.0)]	Class 2	stable	stable	0.00170194	0.00109307	49	30	0	41	4	89
1224	298.879	negative	no	298.878	298.879	26.4767	25.313	27.4797	298.87861Da/26.47674s	stable	stable	stable	0.000220482	0.000165117	0	7	0	23	90	53
1225	298.888	negative	no	298.888	298.888	29.202	27.8693	30.9928	298.8877Da/29.20198s	stable	stable	stable	0.000296573	0.000225457	1	20	1	93	96	88
1226	299.125	negative	no	299.125	299.125	216.606	215.234	218.924	[("abacavir 5'-carboxylic acid**", '1.513', 'M-H_chebi', 'C14H16N6O2')]	Class 3	Class 3	Class 2	0.00012809	0.000125368	2	2	0	28	67	25
1230	299.863	negative	no	299.863	299.863	264.505	263.662	265.917	299.86341Da/264.5045s	stable	stable	stable	0.00020449	0.000165855	0	6	0	5	21	71
1231	299.863	negative	no	299.863	299.864	238.918	237.203	240.526	299.8634Da/238.91811s	stable	stable	stable	0.000288069	0.000329616	8	5	0	40	71	33
1233	299.944	negative	no	299.944	299.944	294.409	293.332	294.882	299.94413Da/294.40927s	Class 2	Class 1	Class 3	0.00019704	0.000209091	2	1	0	93	18	64
1234	300.04	negative	no	300.039	300.04	37.9422	35.2124	40.9457	[('n-acetyl-d-galactosamine 6-sulfate', 1.0), ('n-acetylgalactosamine 6-sulfate', 1.0)]	Class 2	Class 3	stable	0.000288308	0.000360268	0	5	0	54	67	21
1238	300.903	negative	no	300.902	300.903	29.7065	21.9535	30.7486	300.90268Da/29.70654s	stable	stable	stable	0.000196336	0.000160393	0	1	0	77	33	36
1239	300.91	negative	no	300.91	300.911	29.2586	28.2674	29.8621	[('N-[4-(5-bromo-2-thiophenyl)-2-thiazolyl]acetamide**', '1.636', 'M-H_chebi', 'C9H7Br1N22')]	Class 3	stable	Class 3	7.88183e-05	0.00011029	0	4	0	54	83	57
1240	301.057	negative	no	301.057	301.057	217.12	215.843	219.582	[('pyrogallol-2-o-glucuronide', 1.0)]	Class 3	stable	stable	0.000804071	0.000618473	17	2	8	97	40	11
1241	301.057	negative	no	301.057	301.057	173.619	172.716	179.019	[('pyrogallol-2-o-glucuronide', 1.0)]	Class 3	Class 2	Class 3	0.00100146	0.000590687	3	39	2	11	39	84
1242	301.072	negative	no	301.072	301.072	392.959	392.152	393.631	[("2,3',6-trihydroxy-4'-methoxybenzylcoumaranone", 1.0), ("2,3',6-trihydroxy-4'-methoxybenzylcoumaranone", 1.0), ('homoeriodictyol chalcone', 1.0)]	Class 3	Class 3	stable	0.000220176	0.000189406	2	3	14	40	69	72
1243	301.145	negative	no	301.145	301.145	350.366	350.164	351.188	[('6-ketoestriol', 1.0), ('enterodiol', 1.0)]	stable	stable	stable	0.000192188	0.000148265	0	1	0	1	34	99
1244	301.166	negative	no	301.166	301.166	304.154	302.218	304.814	[('glycerol tributanoate', 1.0), ('glycerol tributanoate', 1.0)]	stable	stable	stable	0.000271728	0.000222885	0	5	0	64	3	75
1245	301.166	negative	no	301.166	301.166	401.031	400.365	401.732	[('glycerol tributanoate', 1.0), ('glycerol tributanoate', 1.0)]	Class 2	Class 2	Class 2	0.000527312	0.000345924	1	7	0	24	77	7
1246	301.202	negative	no	301.202	301.203	400.538	400.073	401.168	[('xi-8-hydroxyhexadecanedioic acid', 1.0), ('xi-7-hydroxyhexadecanedioic acid', 1.0), ('xi-7-hydroxyhexadecanedioic acid', 1.0), ('xi-8-hydroxyhexadecanedioic acid', 1.0), ('emedastine', 1.0)]	stable	stable	Class 3	0.000521073	0.00038453	0	13	46	13	34	13
1250	302.052	negative	no	302.052	302.052	90.3841	76.5693	98.6662	[('3-chloro-4-[(1-ethyl-2-benzimidazolyl)thio]aniline**', '1.828', 'M-H_chebi', 'C15H14Cl1N3S1')]	Class 2	Class 2	stable	0.000141281	0.000124458	0	3	0	14	19	31
1251	302.847	negative	no	302.847	302.847	30.1466	28.101	30.8219	302.84716Da/30.14656s	stable	stable	Class 3	8.66568e-05	8.78378e-05	0	4	0	30	64	19
1252	302.857	negative	no	302.856	302.858	29.827	28.4932	30.7328	302.85717Da/29.82704s	stable	stable	stable	0.000621729	0.000465228	0	34	15	79	6	67
1253	303.073	negative	no	303.072	303.073	196.637	194.951	199.166	[('1-(2-chlorophenyl)-3-(3-phenylpropyl)thiourea**', '0.506', 'M-H_chebi', 'C16H17Cl1N2S1'), ('3-(2-chloro-10-phenothiazinyl)-N-methyl-1-propanamine**', '0.506', 'M-H_chebi', 'C16H17Cl1N2S1'), ('2-(2-chloro-10-phenothiazinyl)-N,N-dimethylethanamine**', '0.506', 'M-H_chebi', 'C16H17Cl1N2S1')]	Class 3	stable	stable	0.000242938	0.000206603	2	6	0	18	87	59
1255	304.914	negative	no	304.914	304.915	26.8964	21.4014	28.0034	[('(Z)-3-(4-iodophenyl)-2-mercaptoacrylic acid**', '2.471', 'M-H_chebi', 'C9H72S1')]	stable	stable	stable	0.000206211	0.000180953	0	0	0	77	33	40
1256	305.07	negative	no	305.07	305.071	262.115	258.985	263.942	305.07047Da/262.11537s	stable	stable	stable	0.000408568	0.000271341	0	43	24	14	98	14
1257	305.151	negative	no	305.15	305.151	334.311	308.347	335.274	[('ruxolitinib**', '2.136', 'M-H_chebi', 'C17H18N6'), ('3-cyclopentyl-3-[4-(7H-pyrrolo[2,3-d]pyrimidin-4-yl)-1-pyrazolyl]propanenitrile**', '2.136', 'M-H_chebi', 'C17H18N6')]	stable	stable	stable	0.000330348	0.000207325	0	0	0	13	89	36
1260	305.916	negative	no	305.916	305.916	222.192	220.387	225.908	305.91588Da/222.19166	Class 3	stable	stable	0.00019757	0.000208961	0	2	0	18	1	10
1261	305.918	negative	no	305.918	305.918	26.8964	24.4379	28.0034	305.91781Da/26.8964s	stable	stable	stable	0.00015667	0.000137584	0	0	0	77	33	40
1262	305.921	negative	no	305.921	305.922	57.447	51.7201	59.7599	305.9212Da/57.44703s	Class 2	Class 2	Class 2	0.000202501	0.000142558	0	4	0	45	15	71
1266	306.859	negative	no	306.859	306.859	29.6572	27.5996	30.505	306.85912Da/29.65717s	stable	stable	stable	0.000351569	0.000265855	1	3	3	53	72	12
1267	306.91	negative	no	306.91	306.911	26.8964	24.4379	27.9922	306.91047Da/26.8964s	stable	stable	stable	0.000200641	0.000235023	0	0	0	77	33	40
1269	307.119	negative	no	307.119	307.119	415.781	415.164	416.397	[('8-acetylegelolide', 1.0), ('monocerin', 1.0)]	stable	stable	stable	0.000380359	0.000284453	3	19	0	40	21	26
1270	307.159	negative	no	307.159	307.159	566.309	564.251	580.621	[('1-[(3-chlorophenyl)methyl]-N,N-diethyl-3-piperidinecarboxamide**', '0.084', 'M-H_chebi', 'C17H25Cl1N2O1')]	Class 2	Class 2	stable	0.00157874	0.0010776	50	6	4	82	19	17
1271	307.851	negative	no	307.851	307.852	403.943	402.908	404.583	307.85122Da/403.94333s	stable	Class 3	Class 3	0.000371899	0.000346115	3	4	11	31	37	20
1275	307.913	negative	no	307.913	307.913	221.887	220.387	224.867	307.91293Da/221.88676	Class 2	Class 3	stable	9.41281e-05	0.00011732	0	2	0	11	8	10
1276	308.099	negative	no	308.099	308.1	37.2901	34.701	39.0543	[('n-acetyl-a-neuraminic acid', 1.0), ('n-acetyl-beta-neuraminate', 1.0)]	stable	stable	stable	0.00172451	0.00132959	1	2	37	18	1	82
1278	308.792	negative	no	308.792	308.794	31.0448	29.1866	38.2112	308.79233Da/31.04478s	stable	Class 3	Class 2	0.000570949	0.000463886	1	4	0	96	7	78
1280	308.907	negative	no	308.907	308.908	26.8964	24.4379	28.0034	308.90733Da/26.8964s	stable	stable	stable	0.000170971	0.000175498	0	0	0	77	33	40
1282	308.936	negative	no	308.936	308.936	26.3087	24.4379	27.4702	[('ribose-1-arsenate', 1.0)]	Class 3	Class 3	Class 3	8.02821e-05	9.7644e-05	0	3	0	58	4	38
1283	309.046	negative	no	309.046	309.046	204.414	202.519	209.904	[('7-(4-quinazolinyloxymethyl)-5-thiazolo[3,2-a]pyrimidinone**', '3.180', 'M-H_chebi', 'C15H10N4O2S1')]	Class 2	Class 3	stable	0.00260797	0.00117134	0	2	0	11	21	10
1284	309.12	negative	no	309.119	309.12	242.814	238.518	243.721	[('alpha-tyvelopyranosyl-(1->3)-alpha-D-mannopyranose**', '2.792', 'M-H_chebi', 'C12H22O9'), ('alpha-L-Rhap-(1->2)-L-Rhap**', '2.792', 'M-H_chebi', 'C12H22O9'), ('3-O-alpha-abequopyranosyl-alpha-D-mannopyranose**', '2.792', 'M-H_chebi', 'C12H22O9'), ('alpha-tyvelopyranosyl-(1->3)-beta-D-mannopyranose**', '2.792', 'M-H_chebi', 'C12H22O9'), ('alpha-paratopyranosyl-(1->3)-alpha-D-mannopyranose**', '…	Class 3	Class 2	Class 2	0.000184703	0.000135636	3	0	3	13	81	62
1285	309.848	negative	no	309.848	309.849	403.916	402.908	404.583	309.84834Da/403.91638s	stable	Class 3	Class 2	0.000378989	0.000265925	5	5	39	31	40	20
1287	309.911	negative	no	309.911	309.911	26.9679	25.638	27.5073	309.91072Da/26.9679	stable	stable	stable	0.000182974	0.000158411	0	4	0	56	60	96
1288	310.116	negative	no	310.116	310.116	192.394	190.573	196.915	[('1,7-dimethylguanosine', 1.0), ('n2,n2-dimethylguanosine', 1.0)]	Class 2	Class 2	stable	0.00426787	0.0018026	0	2	0	11	16	82
1290	310.79	negative	no	310.789	310.791	31.1114	29.1866	39.117	310.78957Da/31.11141s	Class 2	Class 2	Class 2	0.000433873	0.000308704	0	7	0	7	84	22
1291	310.871	negative	no	310.871	310.871	28.5876	27.2834	29.1439	310.87095Da/28.58757s	stable	stable	stable	0.0021542	0.00107201	37	1	42	42	60	40
1292	310.898	negative	no	310.898	310.898	197.886	196.776	205.177	310.89803Da/197.8862s	Class 2	Class 3	stable	0.000165432	0.000171369	0	10	0	11	71	61
1293	310.931	negative	no	310.931	310.932	29.1908	21.9535	30.2207	310.93146Da/29.19084	stable	stable	stable	0.00123082	0.000792266	31	5	5	19	32	51
1298	311.846	negative	no	311.845	311.846	403.986	402.908	404.573	311.8455Da/403.9859s	Class 3	Class 3	Class 2	0.000354549	0.000253341	1	8	47	31	37	20
1299	311.882	negative	no	311.881	311.882	252.235	250.521	253.283	311.88183Da/252.23465s	stable	Class 3	stable	0.000374247	0.000257492	9	11	0	1	71	47
1300	311.963	negative	no	311.963	311.963	326.643	325.471	327.608	[('(2Z,4E)-2-hydroxy-6-oxo-(4-bromophenoxy)-hexa-2,4-dienoate**', '1.686', 'none_meta', 'C12H8O5Br1')]	Class 1	stable	stable	0.00012938	0.000120058	0	0	0	24	18	64
1304	312.866	negative	no	312.866	312.867	29.244	27.2834	30.2201	312.86644Da/29.24403s	stable	stable	stable	0.000652812	0.000393266	9	2	14	87	63	94
1305	312.876	negative	no	312.876	312.876	29.8213	27.66	30.7666	312.87599Da/29.82131s	stable	stable	stable	0.00118764	0.00114501	0	4	12	7	41	39
1306	312.895	negative	no	312.895	312.895	198.087	196.565	205.177	312.89507Da/198.08727s	Class 2	Class 2	stable	0.000227999	0.000166606	0	4	0	29	44	61
1307	312.904	negative	no	312.904	312.905	26.8999	24.4379	28.3367	312.90444Da/26.8999	stable	stable	stable	0.000121672	0.000121577	0	1	0	23	33	40
1308	313.239	negative	no	313.239	313.239	475.775	466.931	489.408	[('(8e,10s)-10-hydroperoxyoctadeca-8-enoate', 1.0), ('12,13-dhome', 1.0), ('octadecanedioic acid', 1.0), ('(9xi,10xi,12xi)-9,10-dihydroxy-12-octadecenoic acid', 1.0), ('13s-hpome(11e)', 1.0), ('14s-hpome(12e)', 1.0), ('12s-hpome(13z)', 1.0), ('10r-hpome(11z)', 1.0), ('7-hpome(5e)', 1.0), ('8-hpome(6e)', 1.0), ('9-hpome(7e)', 1.0), ('11-hpome(9z)', 1.0), ('12-hpome(10e)', 1.0), ('6-hpome(7e)', 1.0…	stable	stable	stable	0.000376545	0.000265806	3	7	0	64	35	6
1311	313.856	negative	no	313.856	313.857	25.7891	25.6782	26.8964	313.85634Da/25.78915s	stable	stable	stable	0.000183205	0.000157442	2	10	0	57	20	38
1312	313.879	negative	no	313.878	313.879	252.321	250.787	253.283	313.87884Da/252.32068s	Class 3	Class 3	stable	0.000281147	0.000279764	5	3	0	65	71	47
1313	313.96	negative	no	313.96	313.96	326.642	325.471	327.608	313.95984Da/326.64183	Class 3	Class 3	Class 3	0.000112738	9.94846e-05	2	2	0	80	56	64
1314	314.198	negative	no	314.198	314.198	385.384	384.546	386.373	[('butoctamide hydrogen succinate', 1.0)]	Class 2	Class 2	Class 2	0.00054193	0.00041976	1	0	0	24	77	7
1317	314.873	negative	no	314.873	314.873	29.9108	27.66	30.424	314.87296Da/29.91084s	stable	stable	stable	0.00204939	0.00109995	0	12	48	39	50	88
1319	315.124	negative	no	315.124	315.124	320.063	319.26	320.642	[("2'-o-methylodoratol", 1.0), ('1-(2-hydroxy-4,6-dimethoxyphenyl)-3-(4-methoxyphenyl)propan-1-one', 1.0), ('o-methylodoratol', 1.0), ("5'-hydroxy-3',4',7-trimethoxyflavan", 1.0), ('verimol b', 1.0), ('verimol a', 1.0)]	stable	stable	stable	0.000324766	0.000234829	0	6	1	64	89	65
1320	315.182	negative	no	315.182	315.182	421.67	421.044	422.517	[('neryl glucoside', 1.0), ('d-linalool 3-glucoside', 1.0)]	Class 2	Class 2	Class 2	0.000187485	0.000168959	0	0	0	24	77	7
1322	315.885	negative	no	315.884	315.885	59.0607	57.1859	62.1412	315.88497Da/59.06066s	Class 2	Class 2	stable	0.00342	0.00149304	0	43	43	97	16	11
1328	316.888	negative	no	316.887	316.888	29.1734	27.0951	29.9821	[('tridiphane', 1.0), ('tridiphane', 1.0)]	stable	stable	stable	0.000198003	0.000198057	4	6	0	39	47	44
1330	317.092	negative	no	317.091	317.092	197.115	194.951	204.188	[('threoninyl-tyrosine', 1.0), ('tyrosyl-threonine', 1.0)]	Class 2	stable	stable	0.00745443	0.00257245	10	6	0	11	21	86
1331	317.151	negative	no	317.151	317.151	337.279	336.626	343.791	[('imiprothrin**', '1.119', 'M-H_chebi', 'C17H22N2O4'), ('(1R)-cis-imiprothrin**', '1.119', 'M-H_chebi', 'C17H22N2O4'), ('(1R)-trans-imiprothrin**', '1.119', 'M-H_chebi', 'C17H22N2O4'), ('3-(hydroxymethyl)-6-[4-(3-methylbut-2-enyloxy)benzyl]piperazine-2,5-dione**', '1.119', 'M-H_chebi', 'C17H22N2O4'), ('N-(6-acetyl-1,3-benzodioxol-5-yl)-2-(2-methyl-1-piperidinyl)acetamide**', '1.119', 'M-H_chebi'…	stable	stable	stable	0.000382086	0.000386081	1	3	6	64	80	50
1335	318.146	negative	no	318.146	318.147	268.493	265.988	270.782	[('supinine', 1.0)]	Class 3	Class 3	stable	0.000126963	8.78424e-05	0	2	0	89	51	59
1337	318.832	negative	no	318.832	318.833	30.1724	27.66	31.272	318.83241Da/30.17235s	stable	stable	stable	0.00184215	0.00135728	0	1	6	39	41	80
1339	319.067	negative	no	319.067	319.068	149.477	125.51	166.45	[('arabinofuranosylguanine', 1.0)]	Class 2	stable	stable	0.000959597	0.00064505	2	4	0	27	8	82
1340	319.104	negative	no	319.104	319.104	225.422	222.078	228.533	[('promazine', 1.0), ('promethazine', 1.0)]	stable	Class 3	stable	0.000280435	0.000278088	0	2	0	18	8	10
1341	319.13	negative	no	319.13	319.131	314.729	313.631	315.939	[('formylfusarochromanone', 1.0)]	stable	stable	Class 3	0.000189239	0.000173408	0	2	0	13	51	59
1342	319.167	negative	no	319.166	319.167	346.231	342.577	347.39	[('(10s)-juvenile hormone iii diol', 1.0)]	stable	stable	stable	0.000559834	0.000367548	5	2	13	64	51	75
1343	319.192	negative	no	319.191	319.192	373.047	360.354	374.087	[('testolate', 1.0), ("5'-carboxy-alpha-chromanol", 1.0), ('testolic acid', 1.0)]	stable	stable	stable	0.00258447	0.00128714	50	10	1	16	98	6
1344	320.063	negative	no	320.062	320.063	90.6488	76.6105	98.6662	[('beta-citryl-l-glutamic acid', 1.0), ('beta-citryl-l-glutamate', 1.0)]	Class 2	Class 2	Class 3	9.44436e-05	0.000108297	0	1	0	14	19	31
1345	320.162	negative	no	320.162	320.162	326.642	325.087	327.89	320.162Da/326.64169s	Class 3	Class 3	stable	0.000114253	0.000113839	0	1	0	13	51	59
1346	320.17	negative	no	320.169	320.17	346.221	336.223	347.39	[('4-[2-(2-methyl-1,3-thiazol-4-yl)ethyl]-3-(non-8-en-1-yl)oxetan-2-one**', '4.160', 'M-H_chebi', 'C18H27N1O2S1'), ('(3R,4R)-A2-58-06**', '4.160', 'M-H_chebi', 'C18H27N1O2S1'), ('(3S,4S)-A2-58-06**', '4.160', 'M-H_chebi', 'C18H27N1O2S1')]	stable	stable	stable	0.000389082	0.000289232	1	1	0	11	51	75
1347	320.191	negative	no	320.19	320.191	475.773	474.642	478.728	320.19064Da/475.77286	Class 2	Class 3	stable	0.0138118	0.00334572	50	6	50	51	76	98
1348	320.887	negative	no	320.887	320.887	26.7883	24.4379	27.5073	[('Tetrasul**', '0.391', 'M-H_chebi', 'C12H6Cl4S1')]	stable	stable	stable	0.000602097	0.000376353	3	42	0	89	81	65
1349	321.146	negative	no	321.145	321.146	291.908	289.394	312.737	[('2-[carboxymethyl-[2-(2,6-diethylanilino)-2-oxoethyl]amino]acetic acid**', '0.826', 'M-H_chebi', 'C16H22N2O5')]	stable	stable	stable	0.000260061	0.000181965	0	5	0	13	89	26
1351	322.887	negative	no	322.887	322.888	26.2961	24.3382	27.4638	322.88727Da/26.29607s	stable	stable	stable	0.000139566	0.000118428	3	3	0	60	12	6
1352	322.905	negative	no	322.905	322.906	29.446	27.5308	30.505	322.90487Da/29.44598s	stable	stable	stable	0.00231273	0.00167514	5	0	1	44	41	12
1355	323.107	negative	no	323.106	323.107	545.505	512.371	553.12	[('acetohexamide', 1.0)]	Class 3	Class 3	stable	0.00403776	0.00151434	44	3	8	36	50	41
1358	323.885	negative	no	323.885	323.885	26.2975	24.8549	27.4953	[('5-bromo-4-chloro-3-indolyl phosphate**', '4.235', 'M-H_chebi', 'C8H6Br1Cl1N1O4P1')]	stable	stable	stable	0.000143491	0.000122678	3	16	0	78	88	69
1359	324.073	negative	no	324.073	324.073	209.779	208.236	214.415	[('dihyroxy-1h-indole glucuronide i', 1.0), ('zofenoprilat', 1.0)]	Class 2	Class 2	stable	0.000984515	0.000798805	1	3	0	11	19	26
1360	324.073	negative	no	324.073	324.073	147.439	137.903	158.861	[('pancratistatin', 1.0), ('dihyroxy-1h-indole glucuronide i', 1.0)]	Class 2	Class 2	stable	0.00391256	0.00181617	0	1	0	71	50	54
1363	325.104	negative	no	325.103	325.104	545.394	530.103	552.534	[('Humilixanthin**', '0.294', 'M-H_chebi', 'C14H18N2O7'), ('Dinobuton**', '0.294', 'M-H_chebi', 'C14H18N2O7')]	Class 2	Class 2	stable	0.00335926	0.00146536	37	4	0	43	50	41
1364	325.13	negative	no	325.13	325.13	366.85	365.876	367.429	[('(3R,4R)-4,8-dihydroxy-3-((R)-2-hydroxypentyl)-6,7-dimethoxyisochroman-1-one**', '0.104', 'M-H_chebi', 'C16H22O7'), ('Hinokitiol glucoside**', '0.104', 'M-H_chebi', 'C16H22O7')]	Class 3	stable	stable	0.00108849	0.000769184	5	1	7	71	40	92
1365	325.185	negative	no	325.184	325.185	482.247	473.44	512.695	[('2-dodecylbenzenesulfonic acid', 1.0), ('4-dodecylbenzenesulfonic acid', 1.0)]	Class 1	Class 1	Class 1	9.21168e-05	8.73855e-05	0	3	0	90	73	61
1367	325.898	negative	no	325.897	325.898	300.043	298.382	300.476	325.89767Da/300.04327s	stable	stable	stable	0.000267259	0.00018952	0	1	0	5	3	26
1368	326.089	negative	no	326.088	326.089	162.398	157.996	171.177	[('acetaminophen glucuronide', 1.0)]	Class 2	Class 2	stable	0.000183852	0.000153882	0	3	0	41	19	5
1369	326.76	negative	no	326.76	326.76	30.9698	29.01	32.1804	326.76011Da/30.96984s	stable	Class 2	Class 2	0.000613111	0.000384791	0	2	16	17	63	78
1372	327.088	negative	no	327.088	327.088	322.591	314.138	323.712	[('ophiopogonanone a', 1.0), ('exostemin', 1.0), ("4-o-methyl-3',4'-methylenedioxymopanan-4alpha-ol", 1.0), ('tephrone', 1.0), ('milletenone', 1.0), ('frenolicin b', 1.0)]	stable	Class 1	stable	0.00362828	0.00211679	50	13	2	16	86	38
1374	327.895	negative	no	327.895	327.895	300.083	298.382	300.765	327.8947Da/300.08282s	stable	stable	stable	0.000100301	0.000122904	1	1	0	64	3	79
1376	328.213	negative	no	328.213	328.213	473.389	472.803	473.448	[('6-keto-decanoylcarnitine', 1.0)]	Class 1	Class 2	stable	0.00835967	0.00231582	50	7	31	51	19	17
1378	328.757	negative	no	328.757	328.758	31.0315	29.01	32.1804	328.75716Da/31.03155s	Class 2	Class 3	Class 2	0.000377339	0.000280317	1	8	6	68	23	22
1381	328.861	negative	no	328.861	328.862	29.1719	27.5996	30.505	328.8614Da/29.17191s	Class 2	Class 3	Class 3	0.0001593	0.000187218	2	4	0	44	41	57
1384	329.103	negative	no	329.103	329.104	321.519	313.165	328.467	[("(±)-3',4'-methylenedioxy-5,7-dimethylepicatechin", 1.0), ('(r)-2-feruloyl-1-(4-hydroxyphenyl)-1,2-ethanediol', 1.0), ('2,3-dihydro-2-(4-hydroxyphenyl)-5,6,7-trimethoxy-4h-1-benzopyran-4-one', 1.0), ('samaderin a', 1.0)]	stable	Class 2	Class 2	0.00214904	0.00107673	24	6	0	16	60	70
1385	329.103	negative	no	329.103	329.104	361.11	360.003	361.471	[('cerasinone', 1.0), ("3'-o-methylviolanone", 1.0), ('acetylshikonin', 1.0), ('2,3-dihydro-2-(4-hydroxyphenyl)-5,6,7-trimethoxy-4h-1-benzopyran-4-one', 1.0), ('americanol a', 1.0), ('isoamericanol a', 1.0)]	stable	Class 3	stable	0.000783482	0.0005149	1	5	36	29	3	52
1386	329.197	negative	no	329.197	329.198	440.642	439.984	441.49	[('ascr#17**', '2.047', 'M-H_chebi', 'C17H30O6'), ('oscr#17**', '2.047', 'M-H_chebi', 'C17H30O6')]	Class 2	Class 2	Class 2	0.000174243	0.000163847	3	18	1	80	77	7
1387	329.234	negative	no	329.234	329.234	396.91	395.757	398.096	[('(9s,10e,12s,13s)-9,12,13-trihydroxy-10-octadecenoic acid', 1.0), ('(9s,10e,12s,13s)-9,12,13-trihydroxy-10-octadecenoic acid', 1.0), ('9,12,13-trihome', 1.0)]	stable	stable	stable	0.00412471	0.00199139	50	50	0	13	57	42
1389	330.237	negative	no	330.237	330.237	396.877	395.864	397.496	330.23716Da/396.87662s	Class 3	stable	stable	0.00428271	0.00163523	46	50	0	27	57	42
1392	330.802	negative	no	330.801	330.802	31.4074	29.5624	32.1804	330.80161Da/31.4074s	Class 2	Class 3	Class 3	0.000335314	0.000263456	1	22	0	12	92	99
1394	331.071	negative	no	331.071	331.071	200.055	198.296	205.767	[('tyrosyl-aspartate', 1.0), ('aspartyl-tyrosine', 1.0), ('4-nitrophenyl-3-ketovalidamine', 1.0), ('medinoterb acetate', 1.0)]	Class 2	Class 3	stable	0.00052528	0.00048264	4	4	0	11	21	95
1395	331.177	negative	no	331.176	331.177	390.529	389.122	403.838	[('(2s,3s)-2-hydroxytridecane-1,2,3-tricarboxylic acid', 1.0), ('lmfa13010036', 1.0), ('(2s,3s)-2-hydroxytridecane-1,2,3-tricarboxylate', 1.0), ('neomenthol-glucuronide', 1.0)]	Class 3	stable	stable	0.000167255	0.000154918	1	3	0	83	1	49
1396	331.224	negative	no	331.224	331.225	330.176	328.552	330.926	331.22431Da/330.17615s	Class 3	stable	stable	0.0117047	0.00200896	50	27	0	5	67	10
1398	332.18	negative	no	332.18	332.18	390.512	389.65	391.301	[('2,2-dimethyl-N-[[2-(4-methyl-1-piperidinyl)anilino]-sulfanylidenemethyl]propanamide**', '0.978', 'M-H_chebi', 'C18H27N31')]	Class 3	stable	stable	0.000219694	0.000246581	0	3	0	83	40	74
1401	332.939	negative	no	332.938	332.939	26.3994	25.2794	27.4702	332.93858Da/26.39938s	stable	Class 3	stable	0.000122361	0.000130295	3	3	0	58	71	76
1402	332.94	negative	no	332.939	332.941	242.973	240.32	243.954	332.94014Da/242.97273s	Class 2	Class 2	Class 2	0.000204664	0.000173744	0	4	0	24	77	7
1403	333.09	negative	no	333.09	333.091	392.784	391.961	393.474	[('penicillin g', 1.0)]	stable	stable	stable	9.18672e-05	9.04908e-05	0	3	0	13	34	82
1404	333.136	negative	no	333.135	333.136	545.983	527.113	553.084	[('amifloxacin', 1.0)]	Class 2	Class 2	stable	0.00438083	0.00143508	7	0	2	36	50	41
1406	334.937	negative	no	334.936	334.938	243.012	240.32	243.954	334.93716Da/243.01216s	Class 2	Class 2	Class 2	0.000209523	0.000172635	0	3	0	24	77	7
1407	335.05	negative	no	335.049	335.05	57.6814	46.1041	62.6581	[('2-[(2-phenyl-4-benzofuro[3,2-d]pyrimidinyl)thio]acetic acid**', '0.524', 'M-H_chebi', 'C18H12N2O3S1')]	Class 2	Class 2	Class 2	0.000209069	0.000193324	1	5	3	67	51	69
1408	335.162	negative	no	335.162	335.162	313.422	311.737	314.234	[('tetranor-pgf1alpha', 1.0)]	Class 3	stable	stable	0.000897854	0.00059611	10	0	2	13	46	36
1409	335.223	negative	no	335.223	335.223	425.444	411.458	426.184	[('5(s)-hydroperoxyeicosatetraenoic acid', 1.0), ('15(s)-hpete', 1.0), ('lmfa03060044', 1.0), ('lmfa03060045', 1.0), ('12(r)-hpete', 1.0), ('11(r)-hpete', 1.0), ('9s-hpete', 1.0), ('8(s)-hpete', 1.0), ('12(r)-hpete', 1.0), ('11(r)-hpete', 1.0), ('8(s)-hpete', 1.0), ('5-hpete', 1.0), ('15-hpete', 1.0), ('5-hpete', 1.0), ('15(s)-hpete', 1.0), ('9(s)-hpete', 1.0)]	Class 3	Class 3	Class 1	0.00779923	0.00236417	1	50	50	0	35	37
1412	336.053	negative	no	336.053	336.054	57.4098	49.03	59.7267	[('2,5-dioxo-1-phenyl-1,4-dihydropyrrolo[1,2-a]quinazoline-3-carbonitrile**', '4.059', 'Cl_chebi', 'C18H11N3O2')]	Class 2	Class 2	Class 2	0.000110799	0.000114788	0	4	0	78	24	88
1413	336.789	negative	no	336.789	336.789	30.8113	28.9417	31.5875	336.78896Da/30.81131s	stable	Class 2	Class 2	0.000141428	0.00012783	0	3	5	87	25	22
1415	336.931	negative	no	336.931	336.931	26.3012	25.4135	26.8964	[('methidathion**', '0.735', 'Cl_chebi', 'C6H11N2O43')]	Class 3	Class 2	Class 2	0.000106332	9.55759e-05	2	3	0	58	63	55
1417	338.893	negative	no	338.893	338.894	256.124	253.869	257.721	338.89315Da/256.12408s	stable	stable	stable	0.000333344	0.000391558	0	3	0	83	8	97
1420	340.89	negative	no	340.89	340.891	256.098	253.869	257.721	[('(Z)-3-(4-iodophenyl)-2-mercaptoacrylic acid**', '0.758', 'Cl_chebi', 'C9H72S1')]	stable	stable	stable	0.000306901	0.00036594	0	3	0	83	8	97
1421	341.109	negative	no	341.109	341.111	41.9025	38.8538	46.655	[('maltulose', 1.0)]	Class 2	Class 2	Class 3	0.00160017	0.00124901	3	37	12	16	81	13
1425	342.887	negative	no	342.887	342.888	256.012	253.869	257.54	342.88725Da/256.01211s	stable	Class 3	stable	0.000404193	0.000387096	2	2	0	83	8	54
1426	343.068	negative	no	343.067	343.068	210.29	182.181	214.369	[('theogallin', 1.0)]	Class 3	Class 3	stable	0.000356696	0.000235254	0	1	0	11	19	5
1428	343.261	negative	no	343.26	343.261	420.484	419.664	421.044	343.26072Da/420.48422s	Class 3	Class 3	stable	0.00093837	0.000553507	14	48	0	14	29	62
1429	343.995	negative	no	343.995	343.996	39.6097	36.2533	41.9132	343.99538Da/39.60975s	Class 2	Class 3	Class 3	6.95413e-05	0.000104448	1	6	0	12	21	21
1430	345.156	negative	no	345.156	345.156	323.028	321.422	325.46	[('glucosyl 6-hydroxy-2,6-dimethyl-2e,7-octadienoate', 1.0)]	Class 3	Class 3	stable	0.00038306	0.000295711	5	3	0	1	21	21
1431	345.229	negative	no	345.229	345.229	385.961	385.024	386.957	[('lmfa02000107', 1.0), ('lmfa02000160', 1.0)]	Class 3	stable	stable	0.000171649	0.000156923	0	5	0	5	34	72
1432	346.159	negative	no	346.159	346.159	323.008	322.124	323.207	[('allocain-s', 1.0)]	Class 2	Class 2	Class 3	0.000242427	0.000246307	4	5	0	14	88	17
1433	346.817	negative	no	346.817	346.818	554.773	532.995	568.455	346.81748Da/554.77322	stable	stable	stable	0.000917614	0.000647464	7	2	20	72	52	34
1434	346.956	negative	no	346.955	346.956	281.377	279.703	282.682	346.95558Da/281.3775s	Class 2	Class 2	Class 2	0.000205916	0.000167528	0	2	0	24	77	7
1435	347.076	negative	no	347.075	347.076	39.705	37.2971	43.6648	[('1,2,3,4-tetrahydro-alpha,7-dihydroxy-beta-(hydroxymethyl)-9-methoxy-3,4-dioxocyclopenta[c][1]benzopyran-6-propanal', 1.0), ('alpha-(1,2-dihydroxyethyl)-1,2,3,4-tetrahydro-7-hydroxy-9-methoxy-3,4-dioxocyclopenta[c][1]benzopyran-6-acetaldehyde', 1.0), ('dryopteric acid', 1.0)]	Class 3	Class 2	Class 2	0.000137032	0.000141103	0	2	0	54	78	13
1436	347.2	negative	no	347.2	347.2	492.297	491.65	504.959	[('7s,8s-dihode', 1.0), ('5s,8r-dihode', 1.0), ('(7s,8s)-dihode', 1.0), ('15,16-dihode', 1.0), ('(±)-(e)-13-hydroxy-10-oxo-11-octadecenoic acid', 1.0)]	Class 2	stable	stable	0.00740927	0.00256801	50	50	0	43	57	25
1437	348.916	negative	no	348.916	348.916	26.3512	24.4379	28.3367	348.91624Da/26.35121s	stable	stable	stable	9.16643e-05	0.000108414	0	2	0	58	22	76
1438	348.953	negative	no	348.952	348.953	281.351	279.703	282.446	[('flavianic acid**', '2.491', 'Cl_chebi', 'C10H6N2O8S1')]	Class 2	Class 2	Class 2	0.000193994	0.000177697	0	0	0	24	77	7
1439	349.794	negative	no	349.793	349.794	403.922	402.829	404.623	349.79373Da/403.92181s	stable	stable	Class 1	0.000405379	0.000274	2	3	5	31	37	20
1441	350.777	negative	no	350.777	350.778	30.9224	29.01	31.6056	350.77715Da/30.92242s	stable	Class 3	Class 2	9.76534e-05	0.000100445	0	0	0	56	64	4
1443	350.912	negative	no	350.912	350.913	26.8941	24.4379	27.9922	350.91204Da/26.89411s	Class 3	stable	stable	0.000349307	0.000363556	2	1	2	59	38	2
1444	351.057	negative	no	351.057	351.058	39.0463	35.7312	57.2829	[('a-l-threo-4-hex-4-enopyranuronosyl-d-galacturonic acid', 1.0), ('4-(4-deoxy-alpha-d-gluc-4-enuronosyl)-d-galacturonate', 1.0)]	Class 2	Class 2	Class 3	0.00131646	0.000760896	0	38	33	10	66	31
1445	351.791	negative	no	351.79	351.791	403.954	402.889	404.623	351.79073Da/403.95416s	stable	stable	Class 1	0.00036475	0.000276013	2	3	4	31	37	20
1446	352.087	negative	no	352.086	352.087	367.926	367.044	381.058	[("4-hydroxybenzyl isothiocyanate 4''-acetylrhamnoside", 1.0)]	stable	stable	stable	0.000603651	0.000432368	25	5	0	14	1	74
1447	352.774	negative	no	352.774	352.775	30.9104	28.6387	31.7509	352.77417Da/30.91038s	stable	Class 3	Class 2	0.000127544	0.000112933	1	1	8	56	47	22
1448	352.784	negative	no	352.783	352.784	30.9508	29.1866	31.5875	352.78369Da/30.95084s	Class 2	Class 2	Class 2	0.000227131	0.000171003	0	6	0	79	69	91
1449	352.794	negative	no	352.794	352.795	403.971	402.908	404.573	352.79431Da/403.9711s	stable	Class 2	Class 2	0.000331579	0.000233588	3	1	3	31	69	20
1450	352.825	negative	no	352.825	352.827	29.812	28.3771	30.3841	352.82538Da/29.81203s	stable	stable	Class 3	0.000896239	0.000618042	41	5	41	80	71	63
1451	352.858	negative	no	352.857	352.859	26.9057	24.4379	28.3367	352.85767Da/26.90569s	stable	stable	stable	0.000466064	0.000417058	16	15	0	23	0	40
1452	352.913	negative	no	352.912	352.913	29.7065	27.1392	30.4504	352.91261Da/29.70654s	Class 1	Class 1	Class 1	0.000109788	0.0001036	0	3	0	32	7	51
1455	353.201	negative	no	353.201	353.201	449.368	432.873	452.874	353.20085Da/449.36807	Class 1	Class 1	Class 3	9.74888e-05	8.09334e-05	3	8	0	90	20	61
1456	353.788	negative	no	353.788	353.788	403.943	402.889	404.623	353.78775Da/403.94321s	stable	stable	Class 1	0.000296412	0.000234341	2	3	3	31	37	20
1458	354.771	negative	no	354.771	354.771	30.9755	28.9417	31.6056	354.77123Da/30.9755s	stable	Class 3	Class 2	0.000192183	0.000198405	0	7	13	47	64	22
1459	354.888	negative	no	354.888	354.888	294.145	293.015	295.055	354.88793Da/294.1451s	Class 3	Class 3	stable	0.00111716	0.000686244	48	35	0	64	67	67
1460	354.888	negative	no	354.888	354.888	211.758	195.78	214.341	354.88806Da/211.7584s	Class 2	Class 2	Class 3	0.000197279	0.000192976	0	0	0	11	87	50
1461	355.001	negative	no	355	355.001	258.058	257.872	260.301	355.00058Da/258.05756	stable	stable	stable	0.000525554	0.000465551	0	2	3	29	40	66
1462	355.025	negative	no	355.025	355.025	319.634	319.103	320.217	[('3-[3-(2,4-dichlorophenoxy)propoxy]-6-methyl-2-nitropyridine**', '3.045', 'M-H_chebi', 'C15H14Cl2N2O4')]	Class 2	Class 2	Class 2	0.000437869	0.000305739	3	9	0	97	40	17
1464	355.126	negative	no	355.126	355.126	399.875	399.32	402.693	[('beta-D-Gal-(1->4)-beta-D-Glc-OMe**', '3.471', 'M-H_chebi', 'C13H24O11'), ('alpha-D-Gal-(1->3)-alpha-D-Gal-OMe**', '3.471', 'M-H_chebi', 'C13H24O11'), ('beta-D-Galf-(1->6)-alpha-D-Manp-OMe**', '3.471', 'M-H_chebi', 'C13H24O11'), ('beta-D-Galf-(1->3)-alpha-D-Manp-OMe**', '3.471', 'M-H_chebi', 'C13H24O11'), ('alpha-D-Gal-(1->4)-alpha-D-Gal-OMe**', '3.471', 'M-H_chebi', 'C13H24O11'), ('3-(alpha-D-…	Class 2	Class 3	stable	0.000315597	0.000266743	0	4	0	16	71	41
1465	355.785	negative	no	355.785	355.785	403.943	402.908	404.573	355.7848Da/403.94333s	stable	stable	Class 3	0.000302028	0.000210341	3	7	33	31	37	20
1466	355.998	negative	no	355.998	355.999	258.058	256.809	260.301	355.99849Da/258.05756	stable	stable	stable	0.00089173	0.000855622	0	5	17	86	40	21
1467	356.118	negative	no	356.118	356.118	367.419	366.428	368.225	[('niazimicin a', 1.0)]	Class 3	Class 3	Class 2	0.000174661	0.0001826	3	2	0	50	14	37
1469	356.885	negative	no	356.885	356.885	294.079	292.998	295.055	356.885Da/294.07852	stable	Class 3	stable	0.000793227	0.000615744	46	8	0	83	19	67
1470	356.885	negative	no	356.885	356.885	211.985	197.167	214.341	356.88509Da/211.98526	Class 2	Class 2	stable	0.000965405	0.000640922	0	5	0	11	87	5
1471	356.925	negative	no	356.924	356.925	28.5415	26.0606	29.6822	356.92454Da/28.54151	stable	stable	stable	0.000283207	0.000279499	7	6	0	7	68	40
1473	357.083	negative	no	357.083	357.083	194.259	191.197	218.775	[('dihydrocaffeic acid 3-o-glucuronide', 1.0)]	Class 2	Class 3	stable	0.000355702	0.000403785	0	0	0	11	65	19
1476	358.843	negative	no	358.842	358.844	29.7877	25.6896	30.7666	358.84252Da/29.78773s	stable	stable	stable	0.000275327	0.000209101	0	2	0	71	39	39
1477	359.076	negative	no	359.075	359.076	49.2921	38.4742	52.3127	[('rosmarinic acid', 1.0), ('6-methoxyaromadendrin 3-o-acetate', 1.0), ('rosmarinate', 1.0), ('6,8-di-c-methylmyricetin 3-methyl ether', 1.0)]	Class 2	Class 2	Class 2	0.000167351	0.000169014	0	5	0	91	25	13
1478	359.256	negative	no	359.256	359.256	381.543	380.414	382.229	359.25568Da/381.54309	Class 3	stable	stable	0.00732097	0.00175382	49	10	0	27	1	80
1479	359.822	negative	no	359.822	359.823	403.964	402.908	404.641	359.82248Da/403.96353s	stable	stable	Class 3	0.000542608	0.000342243	2	3	4	31	37	20
1480	360.934	negative	no	360.933	360.934	26.3321	25.4135	26.9007	[('Butonate**', '0.730', 'Cl_chebi', 'C8H14Cl3O5P1')]	stable	stable	Class 3	0.000147826	0.000129479	0	5	0	25	49	23
1481	361.118	negative	no	361.118	361.118	218.402	215.853	224.178	[('Zanthobisquinolone**', '4.035', 'M-H_hmdb', 'C21H18N2O4')]	Class 3	stable	stable	0.0101784	0.0031406	50	22	0	28	21	62
1482	361.151	negative	no	361.151	361.151	323.768	305.456	331.517	361.15091Da/323.76764s	stable	stable	stable	0.000336629	0.000311111	1	0	1	40	13	31
1483	361.82	negative	no	361.819	361.82	403.97	402.908	404.573	361.81953Da/403.97009s	stable	stable	Class 3	0.000261444	0.000225788	2	8	40	31	37	20
1484	362.941	negative	no	362.941	362.942	29.2024	26.6171	30.2207	362.94146Da/29.20236s	stable	stable	stable	0.00273575	0.00160592	28	1	0	44	32	36
1485	363.03	negative	no	363.029	363.03	257.963	255.14	260.301	[('4-[1-[(3,4-dichlorophenyl)methylamino]propylidene]-2-(2-furanyl)-5-oxazolone**', '3.170', 'M-H_chebi', 'C17H14Cl2N2O3')]	stable	stable	stable	0.00073867	0.000620059	0	3	0	83	40	97
1486	363.167	negative	no	363.166	363.167	220.706	219.246	221.485	[('2,6-dideoxy-4-O-methyl-alpha-D-arabino-hexopyranosyl-(1->3)-4-O-acetyl-2-O-methyl-alpha-L-fucopyranose**', '2.268', 'M-H_chebi', 'C16H28O9')]	Class 3	Class 3	stable	0.00347225	0.00164593	33	3	1	29	67	5
1487	363.817	negative	no	363.816	363.817	404.001	402.908	404.573	363.81668Da/404.00122s	stable	Class 2	Class 1	0.00022768	0.000191613	3	4	4	31	55	20
1489	364.014	negative	no	364.013	364.014	285.393	284.705	285.937	[('1-[4-(4-bromophenyl)-2-thiazolyl]-4-piperidinecarboxamide**', '2.235', 'M-H_chebi', 'C15H16Br1N31')]	Class 3	stable	stable	0.000950132	0.000737707	2	1	4	69	8	11
1490	364.032	negative	no	364.032	364.033	258.042	257.223	259.687	364.0322Da/258.04164	Class 2	Class 2	Class 2	0.000321558	0.000339426	0	18	18	62	39	44
1492	364.894	negative	no	364.893	364.894	26.3443	25.4135	27.4658	364.89389Da/26.34426s	Class 3	stable	Class 3	9.446e-05	7.27525e-05	0	5	0	63	22	55
1493	364.939	negative	no	364.939	364.939	29.2116	27.5466	29.8877	[('prothiofos**', '4.256', 'M-2H_Na_chebi', 'C11H15Cl2O22')]	Class 1	Class 2	Class 1	0.000161669	0.000151628	0	2	0	88	62	52
1494	365.074	negative	no	365.073	365.074	545.965	527.113	552.806	365.07355Da/545.96533s	Class 2	Class 2	stable	0.00326284	0.001749	29	4	1	36	50	41
1495	365.136	negative	no	365.136	365.136	166.091	162.279	174.268	[('semilepidinoside b', 1.0)]	Class 2	Class 3	stable	0.00212037	0.00112848	0	1	0	29	19	82
1498	366.027	negative	no	366.027	366.028	258.291	256.762	260.301	[('8-bromo-3-methyl-5-phenyl-1,2,4,5-tetrahydro-3-benzazepin-7-ol**', '2.682', 'Cl_chebi', 'C17H18Br1N1O1'), ('2-[2-(3-bromophenoxy)ethyl]-3,4-dihydro-1H-isoquinoline**', '2.682', 'Cl_chebi', 'C17H18Br1N1O1')]	stable	stable	stable	0.000382866	0.000303005	0	3	0	16	40	54
1499	366.875	negative	no	366.875	366.875	29.316	27.8693	30.7328	366.87525Da/29.31595s	stable	stable	stable	0.000160858	0.000125809	9	6	0	30	96	66
1500	366.89	negative	no	366.889	366.89	26.8983	25.9808	27.4953	366.88955Da/26.89833s	stable	stable	stable	0.000154361	0.000151818	0	2	0	48	71	2
1502	367.159	negative	no	367.159	367.159	399.293	398.167	400.446	[('dehydroepiandrosterone sulfate', 1.0), ('testosterone sulfate', 1.0), ('epitestosterone sulfate', 1.0)]	stable	stable	stable	0.000121998	0.000142467	0	1	0	64	6	92
1504	368.162	negative	no	368.162	368.163	399.325	398.057	400.375	[('alpha-eucaine', 1.0)]	stable	stable	stable	0.000192696	0.000170044	0	6	0	64	6	5
1506	368.89	negative	no	368.89	368.891	29.6957	21.9535	30.7486	368.89032Da/29.6957s	stable	stable	stable	8.79699e-05	0.000105941	2	0	0	17	66	36
1507	368.916	negative	no	368.915	368.916	25.8105	25.2467	26.8938	[('Thyroglobulin 3-Iodotyrosine**', '3.145', 'M-2H_K_chebi', 'C10H92O3')]	Class 2	Class 2	Class 2	0.000164163	0.000164982	0	2	2	58	22	76
1508	369.175	negative	no	369.175	369.175	418.153	416.956	419.341	[('carnocin u i49', 1.0)]	stable	stable	stable	0.000131282	0.000112133	0	4	0	83	1	35
1509	369.175	negative	no	369.174	369.175	369.094	368.232	369.987	[('2-(3-chloro-4-fluorophenoxy)-N-[(3S)-1-(3,3-dimethylbutyl)-3-piperidinyl]acetamide**', '0.146', 'M-H_chebi', 'C19H28Cl1F1N2O2')]	Class 3	stable	stable	0.000212899	0.000177983	2	9	0	5	89	69
1511	370.835	negative	no	370.834	370.835	29.9714	27.8114	30.7328	370.83472Da/29.97138	stable	stable	Class 1	0.000245694	0.000172616	0	9	32	60	73	19
1512	370.887	negative	no	370.887	370.888	29.7065	28.0816	30.2201	370.88729Da/29.70654s	Class 1	stable	stable	0.000127517	0.000113539	5	4	0	17	23	88
1514	372.113	negative	no	372.113	372.113	292.914	292.435	294.159	[('2-[(2R,5R,6S)-6-(hydroxymethyl)-5-[(4-methoxyphenyl)sulfonylamino]-2-oxanyl]acetic acid methyl ester**', '0.230', 'M-H_chebi', 'C16H23N1O7S1'), ('2-[(2R,5S,6S)-6-(hydroxymethyl)-5-[(4-methoxyphenyl)sulfonylamino]-2-oxanyl]acetic acid methyl ester**', '0.230', 'M-H_chebi', 'C16H23N1O7S1'), ('2-[(2S,5R,6S)-6-(hydroxymethyl)-5-[(4-methoxyphenyl)sulfonylamino]-2-oxanyl]acetic acid methyl ester**',…	stable	Class 3	stable	0.000214122	0.000158333	3	11	0	83	41	10
1517	372.902	negative	no	372.902	372.902	28.5753	26.0606	29.6822	372.90214Da/28.57533s	stable	stable	stable	0.000721868	0.000537344	6	10	0	0	0	40
1519	374.847	negative	no	374.847	374.847	29.7297	27.5996	30.7486	[("2-Hydroxy-2',3',4',5,5'-pentachlorobiphenyl**", '1.830', 'Cl_chebi', 'C12H5Cl5O1'), ("4-hydroxy-2,2',3',4',6'-pentachlorobiphenyl**", '1.830', 'Cl_chebi', 'C12H5Cl5O1'), ("4-Hydroxy-2,2',4',5,5'-pentachlorobiphenyl**", '1.830', 'Cl_chebi', 'C12H5Cl5O1'), ("4-Hydroxy-2,3,3',4',5-pentachlorobiphenyl**", '1.830', 'Cl_chebi', 'C12H5Cl5O1')]	stable	stable	stable	0.000108025	9.59824e-05	0	2	0	53	72	57
1521	375.13	negative	no	375.13	375.132	235.603	232.089	275.846	[('(1rs,2rs)-guaiacylglycerol 1-glucoside', 1.0)]	stable	stable	stable	0.000126757	0.000113029	0	5	0	18	67	61
1522	376.791	negative	no	376.791	376.791	30.665	29.1866	31.579	376.79116Da/30.66501s	Class 3	Class 2	Class 3	0.000293008	0.000266193	0	41	11	17	73	44
1524	376.911	negative	no	376.911	376.911	26.3512	24.4379	27.9922	376.91118Da/26.35121s	stable	stable	stable	0.000119188	0.000107857	0	2	0	25	22	76
1526	377.097	negative	no	377.097	377.098	258.042	257.223	260.301	[('cyclobutanecarboxylic acid 4-[[5-(1-naphthalenyl)-1,3,4-oxadiazol-2-yl]thio]but-2-ynyl ester**', '0.915', 'M-H_chebi', 'C21H18N2O3S1'), ('[3-(2-hydroxyphenyl)-5-(4-methoxyphenyl)-3,4-dihydropyrazol-2-yl]-thiophen-2-ylmethanone**', '0.915', 'M-H_chebi', 'C21H18N2O3S1'), ('N-(2-furanylmethyl)-N-[(8-methyl-2-oxo-1H-quinolin-3-yl)methyl]-2-thiophenecarboxamide**', '0.915', 'M-H_chebi', 'C21H18N2O3…	stable	stable	stable	0.000128263	0.000161006	0	2	0	83	40	43
1527	377.146	negative	no	377.146	377.146	189.878	185.889	195.313	[('reduced riboflavin', 1.0)]	Class 2	Class 2	stable	0.00131731	0.00082766	3	22	0	97	50	78
1528	377.146	negative	no	377.145	377.146	266.064	263.781	268.266	[('reduced riboflavin', 1.0)]	stable	stable	stable	0.00028264	0.000207027	4	1	0	83	40	89
1529	377.258	negative	no	377.258	377.259	426.382	425.523	427.153	377.2582Da/426.38193	Class 3	Class 3	stable	0.000585308	0.000475317	7	6	0	41	8	90
1530	377.912	negative	no	377.912	377.913	26.3126	23.3732	26.9107	[('5-bromo-N-[2-(4-chlorophenyl)ethyl]-2-thiophenecarboxamide**', '0.502', 'Cl_chebi', 'C13H11Br1Cl1N1O1S1')]	Class 3	stable	stable	7.78425e-05	8.72561e-05	0	2	0	75	38	76
1532	378.859	negative	no	378.858	378.859	28.7114	27.2834	29.8381	378.85859Da/28.71144s	Class 3	Class 2	Class 2	0.00157046	0.00127367	0	2	5	21	28	53
1533	378.909	negative	no	378.908	378.909	26.3145	25.4135	26.8964	378.90874Da/26.31453	stable	stable	stable	0.000109108	0.000108492	0	3	0	25	22	76
1534	378.919	negative	no	378.919	378.921	29.2034	21.9535	30.2207	378.91908Da/29.20344s	stable	stable	stable	0.0018222	0.0010716	50	5	4	94	32	51
1535	379.083	negative	no	379.083	379.084	36.7391	33.0799	44.9735	[('tetracenomycin f1 methylester', 1.0)]	Class 3	Class 2	stable	0.00242873	0.00133434	0	50	47	43	92	94
1537	379.101	negative	no	379.101	379.102	36.2561	33.6836	38.5136	[('melibiitol', 1.0), ('clusianose', 1.0), ('1-o-alpha-d-glucopyranosyl-d-mannitol', 1.0)]	Class 2	Class 3	Class 3	0.00378455	0.00175889	48	5	0	70	29	13
1538	380.087	negative	no	380.086	380.087	36.9053	33.3487	44.8399	[('isofenphos', 1.0)]	Class 3	Class 2	stable	0.00416388	0.0020161	0	50	39	16	88	27
1539	380.864	negative	no	380.863	380.864	29.8252	27.66	30.7486	380.86364Da/29.82524s	stable	stable	stable	0.000485668	0.000444347	0	3	6	95	83	17
1540	381.085	negative	no	381.085	381.086	34.8168	33.5322	36.4354	[('miraxanthin-v', 1.0), ('nifedipine', 1.0), ('4-hydroxy-6-methylpretetramide', 1.0), ('meta-o-dealkylated flecainide lactam', 1.0)]	Class 2	Class 2	Class 2	0.000546708	0.000397501	1	29	1	5	61	60
1541	381.156	negative	no	381.156	381.156	415.775	414.586	416.756	[('ibuprofen glucuronide', 1.0), ('cyclocalopin b', 1.0)]	Class 2	Class 2	Class 3	0.00016934	0.000184516	0	4	0	87	41	5
1542	382.101	negative	no	382.1	382.101	191.202	189.327	195.119	[('succinyladenosine', 1.0)]	Class 2	Class 2	stable	0.000597135	0.000521553	0	0	0	11	19	93
1544	382.904	negative	no	382.904	382.905	26.3633	25.6959	27.4702	382.90449Da/26.36333s	Class 3	Class 3	Class 2	0.000100309	0.000102427	1	1	0	58	49	38
1545	383.099	negative	no	383.099	383.099	260.511	259.514	262.414	[("5-(3',5'-dihydroxyphenyl)-gamma-valerolactone 3-o-glucuronide", 1.0), ("5-(3',4'-dihydroxyphenyl)-gamma-valerolactone-4'-o-glucuronide", 1.0)]	stable	stable	stable	0.00338987	0.00223363	0	4	11	13	40	80
1547	383.154	negative	no	383.154	383.154	346.713	345.387	347.882	[('4-chloroprogesterone', 1.0)]	Class 3	stable	stable	0.00018144	0.000164167	2	4	0	29	13	10
1548	383.177	negative	no	383.176	383.177	492.293	491.698	492.855	[('lmfa01030747', 1.0)]	Class 2	Class 3	Class 1	0.00239627	0.00147049	45	50	0	43	66	32
1549	383.193	negative	no	383.193	383.193	265.789	262.838	267.472	[('LSM-36486**', '0.250', 'M-H_chebi', 'C26H252')]	Class 3	stable	stable	0.000140813	0.000167294	0	5	0	5	44	62
1550	384.719	negative	no	384.719	384.719	31.152	29.5043	32.1804	384.71883Da/31.152s	Class 2	Class 2	Class 2	0.000192606	0.000213395	0	8	8	66	64	78
1551	384.876	negative	no	384.875	384.876	29.1195	26.6171	29.8621	384.87554Da/29.11952s	Class 2	Class 3	Class 3	0.000128547	0.000171884	2	2	0	6	43	51
1552	384.9	negative	no	384.9	384.9	26.8964	25.313	27.8694	384.90009Da/26.8964s	Class 3	stable	stable	0.000145027	0.000169343	0	7	1	59	38	2
1554	385.17	negative	no	385.169	385.17	314.82	312.996	315.939	[("N'-[2-[(2-cyclohexyl-4-quinazolinyl)thio]-1-oxoethyl]-2-methylpropanehydrazide**", '2.885', 'M-H_chebi', 'C20H26N4O2S1'), ('1-[1-ethyl-4-[4-(4-methoxyphenyl)-1-piperazinyl]-6-methyl-2-sulfanylidene-5-pyrimidinyl]ethanone**', '2.885', 'M-H_chebi', 'C20H26N4O2S1')]	stable	stable	stable	0.000192513	0.000172028	3	5	0	18	13	49
1557	386.94	negative	no	386.939	386.94	26.8758	24.4379	30.0556	386.93989Da/26.87578s	stable	stable	stable	0.000114846	0.000121993	0	2	0	7	2	40
1560	387.287	negative	no	387.287	387.287	426.324	425.672	427.153	387.28701Da/426.32416	Class 3	Class 3	stable	0.00212645	0.0010727	1	2	0	29	8	86
1562	387.941	negative	no	387.94	387.941	26.8834	24.4379	27.7725	387.94071Da/26.88344	Class 3	stable	stable	0.000106941	0.000118951	0	3	0	92	2	70
1564	388.29	negative	no	388.29	388.291	426.2	425.198	427.153	388.29036Da/426.20026	Class 3	stable	stable	0.00116836	0.000724257	2	2	0	5	8	77
1565	388.713	negative	no	388.713	388.713	31.2316	29.5043	32.1804	388.71289Da/31.23163s	Class 2	Class 2	Class 2	0.000335187	0.000201975	0	11	6	46	23	29
1567	388.937	negative	no	388.937	388.938	26.8879	24.4379	27.9922	388.9372Da/26.88793	stable	stable	stable	0.000145197	0.000136353	0	2	0	7	2	18
1568	389.27	negative	no	389.27	389.271	499.36	481.033	499.968	[('bis(2-ethylhexyl)phthalate', 1.0), ('di-n-octyl phthalate', 1.0), ('diisooctyl phthalate', 1.0), ("d8'-merulinic acid a", 1.0)]	stable	stable	Class 3	0.000670988	0.000506129	2	5	39	64	89	60
1569	390.274	negative	no	390.273	390.274	499.357	499.154	499.946	390.27359Da/499.35684	Class 3	Class 3	Class 2	0.000470324	0.000348797	1	6	19	16	86	60
1570	390.892	negative	no	390.892	390.893	29.446	27.5996	30.7486	390.89248Da/29.44598s	Class 1	Class 1	stable	0.000910692	0.0010309	2	0	0	44	41	57
1571	391.286	negative	no	391.285	391.286	498.174	490.863	498.812	[('murocholic acid', 1.0), ('ursodeoxycholic acid', 1.0), ('isodeoxycholic acid', 1.0), ('3b,12b-dihydroxy-5b-cholanoic acid', 1.0), ('hyodeoxycholate', 1.0), ('isodeoxycholate', 1.0), ('allochenodeoxycholate', 1.0), ('3beta,12alpha-dihydroxy-5beta-cholanoate', 1.0), ('lmst04010031', 1.0), ('lmst04010039', 1.0), ('lmst04010047', 1.0), ('lmst04010056', 1.0)]	stable	stable	stable	0.000309681	0.000285286	4	2	6	64	89	72
1572	391.286	negative	no	391.286	391.286	464.074	463.464	468.209	[('chenodeoxycholic acid**', '0.474', 'M-H_chebi', 'C24H40O4'), ('deoxycholic acid**', '0.474', 'M-H_chebi', 'C24H40O4'), ('isoursodeoxycholic acid**', '0.474', 'M-H_chebi', 'C24H40O4'), ('3b,7a-dihydroxy-5b-cholanoic acid**', '0.474', 'M-H_chebi', 'C24H40O4'), ('ursodeoxycholic acid**', '0.474', 'M-H_chebi', 'C24H40O4'), ('hyodeoxycholic acid**', '0.474', 'M-H_chebi', 'C24H40O4'), ('murocholic a…	stable	Class 3	stable	0.000432651	0.00039059	2	4	16	64	89	66
1573	391.975	negative	no	391.975	391.976	258.016	255.14	260.301	391.97529Da/258.0164	stable	stable	stable	0.00028722	0.000259759	0	3	0	83	40	11
1574	392.289	negative	no	392.289	392.29	498.169	464.04	498.786	392.28924Da/498.1694	Class 3	stable	stable	0.000323875	0.000282834	1	4	1	5	89	72
1575	392.889	negative	no	392.888	392.889	26.2975	23.8841	27.4189	392.88872Da/26.29754s	stable	stable	stable	6.85362e-05	8.7439e-05	0	1	0	65	71	47
1577	393.889	negative	no	393.889	393.89	26.2934	23.8841	27.4189	393.8894Da/26.29338s	Class 3	stable	stable	0.000271623	0.000349994	0	2	0	92	45	8
1578	393.972	negative	no	393.972	393.972	258.042	257.261	260.301	393.97205Da/258.04164s	stable	stable	stable	0.000269	0.000263687	0	2	0	27	40	43
1579	394.848	negative	no	394.847	394.848	294.074	293.594	294.854	394.8477Da/294.07407s	Class 2	Class 1	Class 1	0.000197115	0.00015697	2	2	4	93	15	64
1580	394.886	negative	no	394.885	394.886	26.2975	23.8841	27.4189	394.88588Da/26.29754s	stable	stable	stable	9.55736e-05	0.000115773	0	1	0	7	2	18
1582	394.922	negative	no	394.922	394.922	26.3872	25.0782	27.4702	[('firefly sulfoluciferin**', '4.284', 'Cl_chebi', 'C11H8N2O6S3')]	stable	stable	stable	0.000138007	0.000118881	0	4	0	58	22	76
1583	395.008	negative	no	395.008	395.008	273.935	272.094	275.108	[('Tamarixetin 3-O-sulfate**', '0.008', 'M-H_lipid', 'C16H12O10S1'), ('6-Methoxyluteolin 7-sulfate**', '0.008', 'M-H_lipid', 'C16H12O10S1'), ("6-Hydroxyluteolin 3'-methyl ether 7-sulfate**", '0.008', 'M-H_lipid', 'C16H12O10S1'), ('Persicarin**', '0.008', 'M-H_lipid', 'C16H12O10S1'), ('Isorhamnetin 7-O-sulfate**', '0.008', 'M-H_lipid', 'C16H12O10S1'), ('Rhamnetin 3-O-sulfate**', '0.008', 'M-H_lipi…	stable	stable	stable	0.000485592	0.000337901	3	6	17	16	42	84
1584	395.94	negative	no	395.94	395.94	364.707	363.898	365.293	395.93964Da/364.70729s	Class 3	stable	stable	0.000971106	0.000783162	0	16	29	5	30	37
1586	396.845	negative	no	396.844	396.845	294.303	293.594	294.854	[('aldrin**', '2.465', 'Cl_chebi', 'C12H8Cl6'), ('Isodrin**', '2.465', 'Cl_chebi', 'C12H8Cl6')]	Class 2	Class 2	Class 2	0.000123848	0.000114376	3	6	0	93	55	0
1588	396.911	negative	no	396.91	396.911	25.7371	25.2467	26.8938	396.91063Da/25.73713s	Class 2	Class 2	Class 2	0.000107191	0.000120364	0	5	0	58	22	58
1589	396.918	negative	no	396.917	396.919	26.8964	25.8333	27.4953	396.91792Da/26.8964s	Class 3	stable	stable	0.000112312	0.000127194	2	2	0	59	38	2
1590	397.005	negative	no	397.005	397.005	273.934	272.094	275.108	[('N-(4-chlorophenyl)carbamic acid [1-(4-chlorophenyl)-4-triazolyl]methyl ester**', '4.221', 'Cl_chebi', 'C16H12Cl2N4O2'), ('LSM-28526**', '4.221', 'Cl_chebi', 'C17H9F3N2O2S1')]	stable	stable	stable	0.000436459	0.000362685	4	6	35	16	42	84
1591	397.151	negative	no	397.151	397.151	316.112	313.952	318.918	[('methyl (3x,10r)-dihydroxy-11-dodecene-6,8-diynoate 10-glucoside', 1.0), ('methyl 3,4-dihydroxy-5-prenylbenzoate 3-glucoside', 1.0)]	Class 3	stable	stable	0.000140122	0.000103587	1	11	0	50	41	5
1592	397.172	negative	no	397.172	397.172	269.207	266.689	270.947	397.17206Da/269.20697	Class 3	stable	stable	0.000215792	0.000194448	0	2	0	89	88	7
1595	397.937	negative	no	397.937	397.937	364.707	363.898	365.293	[('3-(4-bromophenyl)-4-(4-methoxyphenyl)-1H-1,2,4-triazole-5-thione**', '0.205', 'M-2H_K_chebi', 'C15H12Br1N31'), ('2-bromo-N-[(3-methyl-1,3-benzothiazol-2-ylidene)amino]benzamide**', '0.205', 'M-2H_K_chebi', 'C15H12Br1N31')]	Class 3	stable	Class 3	0.000407888	0.000276752	0	6	39	16	80	60
1599	399.002	negative	no	399.002	399.002	273.858	272.984	275.008	[('[2,6-dihydroxy-4-(3,5,7-trihydroxy-4-oxo-3,4-dihydro-2H-1-benzopyran-2-yl)phenyl]oxidanesulfonic acid**', '2.016', 'M-H_hmdb', 'C15H12O11S1'), ('[5,7-dihydroxy-4-oxo-2-(3,4,5-trihydroxyphenyl)-3,4-dihydro-2H-1-benzopyran-3-yl]oxidanesulfonic acid**', '2.016', 'M-H_hmdb', 'C15H12O11S1'), ('{4-[2,3-dioxo-3-(2,4,6-trihydroxyphenyl)propyl]-2,6-dihydroxyphenyl}oxidanesulfonic acid**', '2.016', 'M-H…	Class 3	stable	stable	0.000248835	0.000219382	0	1	0	71	42	24
1600	401.123	negative	no	401.123	401.124	545.925	527.113	552.806	[('7-hydroxyflavanone 7-O-beta-D-glucoside**', '1.452', 'M-H_chebi', 'C21H22O8'), ("(3'R,4'R)-3'-Epoxyangeloyloxy-4'-acetoxy-3',4'-dihydroseselin**", '1.452', 'M-H_chebi', 'C21H22O8'), ('nobiletin**', '1.452', 'M-H_chebi', 'C21H22O8'), ('graminone B**', '1.452', 'M-H_chebi', 'C21H22O8'), ('2-(2,5-dimethoxyphenyl)-5,6,7,8-tetramethoxy-4H-1-benzopyran-4-one**', '1.452', 'M-H_chebi', 'C21H22O8'), ('…	Class 2	Class 3	stable	0.00408434	0.00144768	37	4	0	36	50	41
1601	402.918	negative	no	402.917	402.918	26.8931	24.4379	27.9922	402.91752Da/26.89314	stable	stable	stable	0.000117688	0.000103079	0	2	0	7	70	40
1602	403.271	negative	no	403.271	403.271	387.123	386.18	387.734	[('bhas#26**', '2.488', 'M-H_chebi', 'C21H40O7'), ('bhos#26**', '2.488', 'M-H_chebi', 'C21H40O7')]	stable	stable	stable	0.000581489	0.000377672	0	8	17	29	89	25
1603	403.919	negative	no	403.918	403.919	26.893	24.4379	27.9922	403.9186Da/26.89304s	stable	stable	stable	6.73968e-05	7.81933e-05	0	2	0	7	70	40
1605	404.915	negative	no	404.915	404.915	26.8935	24.4379	27.9922	404.9149Da/26.89348s	stable	stable	stable	8.46451e-05	9.30167e-05	0	2	0	7	70	40
1606	404.921	negative	no	404.92	404.922	26.8903	24.4379	27.9922	404.9212Da/26.89027	stable	stable	stable	0.000117673	0.000118637	0	2	0	0	70	21
1607	405.066	negative	no	405.066	405.066	545.599	527.113	553.12	[('didemethylasterriquinone D**', '3.542', 'Cl_meta', 'C22H14N2O4')]	Class 2	Class 2	stable	0.00453406	0.00198503	6	1	6	36	50	41
1608	405.144	negative	no	405.144	405.145	236.141	232.158	240.583	[('2-[[2-[2-(2,3-dihydroindol-1-yl)-2-oxoethyl]-1-oxo-5-isoquinolinyl]oxy]acetic acid ethyl ester**', '3.826', 'M-H_chebi', 'C23H22N2O5')]	stable	stable	stable	0.00665098	0.00199456	50	42	0	64	21	86
1609	405.177	negative	no	405.177	405.177	320.656	319.042	321.989	[('cytomycin**', '1.413', 'M-H_meta', 'C17H23N7O5')]	stable	stable	stable	0.000177657	0.000169245	1	0	0	83	1	74
1610	405.265	negative	no	405.265	405.265	417.525	416.767	442.967	405.26525Da/417.52545s	stable	stable	stable	0.000293036	0.000275914	2	2	0	64	98	26
1611	405.916	negative	no	405.916	405.916	26.8931	24.4379	27.9922	405.91604Da/26.89314s	stable	stable	stable	7.50374e-05	7.65062e-05	0	2	0	92	70	40
1612	406.911	negative	no	406.911	406.912	26.8935	24.4379	27.9922	[('4-iodobenzoic acid [1-(2-thiazolyl)ethylideneamino] ester**', '2.748', 'Cl_chebi', 'C12H92O2S1')]	stable	stable	stable	0.000104996	0.000105345	0	2	0	7	2	40
1613	407.281	negative	no	407.28	407.281	442.545	441.328	443.284	[('beta-phocaecholate', 1.0), ('bitocholate', 1.0), ('haemulcholate', 1.0), ('3a,4b,12a-trihydroxy-5b-cholanoic acid', 1.0), ('1,3,12-trihydroxycholan-24-oic acid', 1.0), ('2b,3a,7a-trihydroxy-5b-cholanoic acid', 1.0), ('1b,3a,7a-trihydroxy-5b-cholanoic acid', 1.0), ('6a,12a-dihydroxylithocholic acid', 1.0), ('muricholic acid', 1.0), ('ursocholic acid', 1.0), ('lmst04010249', 1.0), ('lmst04010251…	stable	stable	stable	0.000376591	0.000338621	3	6	0	64	30	26
1614	407.281	negative	no	407.281	407.281	391.11	367.303	411.099	[('cholic acid**', '0.407', 'M-H_chebi', 'C24H40O5'), ('3a,7a,12b-trihydroxy-5b-cholanoic acid**', '0.407', 'M-H_chebi', 'C24H40O5'), ('Hirsutalin E**', '0.407', 'M-H_chebi', 'C24H40O5'), ('ursocholic acid**', '0.407', 'M-H_chebi', 'C24H40O5'), ('alpha-muricholic acid**', '0.407', 'M-H_chebi', 'C24H40O5'), ('hyocholic acid**', '0.407', 'M-H_chebi', 'C24H40O5'), ('Vulpecholate**', '0.407', 'M-H_ch…	stable	stable	stable	0.00015865	0.000141921	0	6	0	1	98	26
1615	407.865	negative	no	407.865	407.866	326.819	325.471	327.608	407.86542Da/326.81891s	Class 2	Class 1	Class 1	0.000201178	0.000223529	0	15	4	75	57	65
1616	408.284	negative	no	408.284	408.285	391.04	390.227	392.211	408.28424Da/391.04047	stable	stable	stable	0.000258633	0.000187864	0	8	0	1	51	59
1617	408.284	negative	no	408.284	408.285	442.533	441.328	443.264	408.28428Da/442.53305	stable	stable	stable	0.000248298	0.000239926	3	6	0	64	30	26
1619	408.863	negative	no	408.863	408.864	326.664	325.471	327.962	[('(±)-Leptophos**', '1.516', 'M-H_hmdb', 'C13H10Br1Cl2O21')]	Class 1	stable	Class 1	0.00012467	0.000158519	0	6	0	24	18	60
1620	408.866	negative	no	408.866	408.867	26.2975	23.8841	27.4189	408.86627Da/26.29754	stable	stable	stable	6.76418e-05	8.35376e-05	0	0	0	0	31	18
1621	409.287	negative	no	409.287	409.288	442.532	441.328	443.117	[('19-phenyl nonadecanoic acid**', '1.742', 'Cl_lipid', 'C25H42O2'), ('5-((Z)-nonadec-8-en-1-yl)resorcinol**', '1.742', 'Cl_lipid', 'C25H42O2')]	Class 2	Class 2	Class 2	0.000283153	0.000229953	1	9	0	64	30	66
1623	409.862	negative	no	409.861	409.862	326.714	325.471	327.608	409.86174Da/326.71393s	Class 1	Class 1	Class 2	7.15893e-05	8.55441e-05	0	0	0	80	15	30
1624	409.867	negative	no	409.867	409.868	26.2975	23.8841	27.4189	[('5-bromo-N-[[[oxo(thiophen-2-yl)methyl]hydrazo]-sulfanylidenemethyl]-2-furancarboxamide**', '0.740', 'M-2H_K_chebi', 'C11H8Br1N3O3S2')]	stable	stable	stable	7.82432e-05	6.01388e-05	0	4	0	0	31	8
1625	410.733	negative	no	410.733	410.733	30.9877	28.9417	31.5875	410.73296Da/30.98771s	stable	Class 3	Class 2	0.000127845	0.000128562	0	4	11	21	64	1
1626	410.86	negative	no	410.86	410.861	326.685	325.471	327.608	410.86013Da/326.68475s	Class 1	Class 1	Class 1	0.000112135	0.000127212	0	2	0	93	57	44
1627	410.863	negative	no	410.863	410.864	26.2975	23.8841	27.4189	410.86345Da/26.29754s	stable	stable	stable	9.60578e-05	9.50561e-05	0	0	0	0	31	18
1628	410.899	negative	no	410.899	410.9	26.3589	24.8549	28.3367	[("N'-[(3,5-dibromo-6-oxo-1-cyclohexa-2,4-dienylidene)methyl]-2-hydroxybenzohydrazide**", '1.544', 'M-H_chebi', 'C14H10Br2N2O3')]	stable	stable	stable	0.000134542	0.000106796	0	2	0	58	79	76
1629	411.13	negative	no	411.13	411.13	321.476	319.634	322.691	[('methylpicraquassioside a', 1.0)]	Class 3	stable	stable	8.84145e-05	7.83109e-05	0	5	0	50	87	5
1630	411.306	negative	no	411.305	411.306	442.227	410.467	443.117	411.30592Da/442.22682	stable	stable	stable	0.000121726	0.000112533	0	1	0	15	85	75
1632	412.309	negative	no	412.309	412.31	442.227	440.728	442.973	412.30937Da/442.22682	stable	stable	stable	0.000109763	0.000112163	0	1	0	15	85	75
1633	412.73	negative	no	412.73	412.73	30.9653	28.9417	31.2428	412.7299Da/30.96525s	Class 3	Class 2	Class 2	7.59389e-05	8.83174e-05	0	3	0	81	47	22
1634	412.86	negative	no	412.86	412.86	26.2975	24.7455	27.5073	412.85984Da/26.29754	Class 3	stable	stable	0.000213201	0.000203174	0	6	0	20	86	78
1635	412.895	negative	no	412.895	412.895	26.8961	24.4379	27.9922	412.895Da/26.89612s	Class 3	stable	stable	0.000258385	0.000194884	0	2	2	59	38	2
1636	413.165	negative	no	413.164	413.165	340.212	339.612	340.909	[('4r-hydroxy solifenacin', 1.0)]	stable	Class 3	stable	0.00462574	0.00200705	49	10	0	27	34	34
1637	413.312	negative	no	413.312	413.313	442.211	441.411	442.757	413.3122Da/442.21115s	stable	Class 3	stable	0.000144162	0.000138432	3	5	0	61	65	56
1642	416.582	negative	no	416.582	416.582	6.81644	5.85631	7.97613	416.582Da/6.81644s	stable	stable	stable	0.000206172	0.000164528	0	29	25	33	43	66
1644	417.644	negative	no	417.644	417.645	18.4553	8.99355	44.9586	417.64447Da/18.45531s	stable	stable	stable	0.00036275	0.000234313	0	3	0	26	43	29
1645	418.214	negative	no	418.214	418.214	340.915	340.233	341.987	[('ACT-333679**', '0.992', 'M-H_chebi', 'C25H29N3O3'), ('LSM-8690**', '0.992', 'M-H_chebi', 'C25H29N3O3'), ('LSM-9303**', '0.992', 'M-H_chebi', 'C25H29N3O3'), ('(2S,3S,4R)-2-cyano-N-cyclohexyl-4-(hydroxymethyl)-3-[4-(4-methoxyphenyl)phenyl]azetidine-1-carboxamide**', '0.992', 'M-H_chebi', 'C25H29N3O3'), ('(2S,3S,3aR,9bR)-7-(cyclopenten-1-yl)-3-(hydroxymethyl)-6-oxo-N-[(1S)-1-phenylethyl]-1,2,3,3a…	Class 2	Class 3	Class 3	0.00028087	0.000234084	1	4	0	96	34	70
1647	418.895	negative	no	418.894	418.895	26.8938	24.4379	27.9922	418.89506Da/26.89382s	stable	stable	stable	0.00036821	0.000425388	0	2	0	0	93	40
1648	419.897	negative	no	419.896	419.897	26.8931	24.4379	27.9922	419.8967Da/26.89314s	stable	stable	stable	0.00031538	0.000596892	0	2	0	0	93	40
1650	420.892	negative	no	420.892	420.893	26.8938	24.4379	27.9922	420.89239Da/26.89382	stable	stable	stable	0.000383136	0.000339515	0	2	0	0	93	40
1651	420.899	negative	no	420.898	420.9	26.8951	24.4379	27.9922	420.89933Da/26.89514s	stable	stable	stable	0.000210743	0.000209324	0	2	0	92	93	40
1652	421.06	negative	no	421.06	421.061	384.552	383.551	385.788	[("N'-(3-chloro-2,4,6-trifluorophenyl)sulfonyl-1-adamantanecarbohydrazide**", '0.578', 'M-H_chebi', 'C17H18Cl1F3N2O3S1')]	stable	stable	stable	0.0027332	0.00159764	26	5	50	41	21	92
1653	421.896	negative	no	421.895	421.896	26.8944	25.2794	27.7725	421.89583Da/26.89443s	stable	stable	stable	0.000347839	0.000255302	0	8	31	53	26	53
1654	422.888	negative	no	422.888	422.888	26.8931	24.4379	27.9922	422.88798Da/26.89314s	stable	stable	stable	0.000419521	0.000457454	0	1	0	0	93	40
1656	423.889	negative	no	423.889	423.89	26.8964	25.313	28.0629	423.88915Da/26.8964s	stable	stable	stable	0.000172341	0.000162814	0	3	0	98	23	12
1657	423.946	negative	no	423.946	423.946	258.121	255.777	260.301	[('epitizide**', '4.151', 'M-H_chebi', 'C10H11Cl1F3N3O4S3')]	stable	stable	stable	0.000402126	0.000431473	0	1	0	75	8	89
1659	424.844	negative	no	424.843	424.845	26.7583	24.4379	27.9922	424.84393Da/26.75833s	stable	stable	stable	0.000135446	0.000112941	0	0	0	77	90	18
1660	424.885	negative	no	424.885	424.886	26.8938	25.4103	27.4891	424.88535Da/26.89382s	Class 3	stable	stable	0.000117336	0.000131953	0	6	0	60	20	65
1661	424.912	negative	no	424.911	424.912	28.6156	26.0606	29.8797	424.91209Da/28.61564s	stable	Class 3	Class 3	0.000316686	0.000344025	0	13	1	17	55	24
1662	425.071	negative	no	425.07	425.072	37.387	34.701	40.1542	[('2-[[2-[(4-chlorophenyl)thio]-1-oxoethyl]amino]-N-(4-methoxyphenyl)benzamide**', '4.164', 'M-H_chebi', 'C22H19Cl1N2O3S1')]	Class 2	Class 2	Class 2	0.00220783	0.00140341	0	28	17	76	24	10
1664	425.943	negative	no	425.943	425.943	257.998	255.777	260.301	425.94298Da/257.99829s	Class 3	Class 3	stable	0.000373193	0.000359431	0	4	0	83	8	68
1667	426.841	negative	no	426.84	426.841	26.3441	24.4379	27.7725	426.84086Da/26.34406s	stable	stable	stable	0.000163664	0.000137039	0	1	0	23	90	18
1668	426.849	negative	no	426.849	426.849	29.2432	27.2834	30.2201	[('Bromophos-ethyl**', '4.037', 'Cl_chebi', 'C10H12Br1Cl2O31')]	stable	stable	stable	0.00167558	0.00113617	4	6	50	42	28	14
1670	427.219	negative	no	427.219	427.219	275.738	273.453	276.899	427.21899Da/275.73795	stable	Class 3	stable	0.000122552	0.000134511	3	5	0	16	78	16
1675	430.929	negative	no	430.929	430.929	29.2458	27.5466	30.2201	[('1-(5-bromo-2-thiophenyl)-2-[(5-methoxy-1-methyl-2-benzimidazolyl)thio]ethanone**', '1.091', 'Cl_chebi', 'C15H13Br1N2O2S2')]	stable	stable	stable	0.000406972	0.000286406	7	1	5	19	7	57
1676	430.985	negative	no	430.984	430.985	274.018	272.094	275.446	[('Tamarixetin 3-O-sulfate**', '0.114', 'Cl_lipid', 'C16H12O10S1'), ('6-Methoxyluteolin 7-sulfate**', '0.114', 'Cl_lipid', 'C16H12O10S1'), ("6-Hydroxyluteolin 3'-methyl ether 7-sulfate**", '0.114', 'Cl_lipid', 'C16H12O10S1'), ('Persicarin**', '0.114', 'Cl_lipid', 'C16H12O10S1'), ('Isorhamnetin 7-O-sulfate**', '0.114', 'Cl_lipid', 'C16H12O10S1'), ('Rhamnetin 3-O-sulfate**', '0.114', 'Cl_lipid', 'C…	stable	stable	Class 3	0.00050682	0.000378933	1	2	21	16	42	37
1677	432.805	negative	no	432.805	432.806	29.3514	27.8114	30.3945	432.80529Da/29.35139s	stable	stable	Class 3	0.00327861	0.00145738	3	6	50	81	60	14
1679	432.982	negative	no	432.981	432.982	273.86	272.094	275.446	432.98163Da/273.85983s	Class 3	Class 3	stable	0.000355074	0.000269573	2	0	0	16	42	84
1680	433.208	negative	no	433.208	433.209	348.562	347.437	351.5	433.20849Da/348.56224	stable	stable	stable	0.000251542	0.000193634	2	19	0	83	1	92
1681	434.873	negative	no	434.872	434.873	26.8944	24.4379	27.9922	434.87262Da/26.89442s	stable	stable	stable	0.00015296	0.000156558	0	0	0	23	33	40
1682	434.979	negative	no	434.978	434.979	273.858	272.094	275.108	[('[2,6-dihydroxy-4-(3,5,7-trihydroxy-4-oxo-3,4-dihydro-2H-1-benzopyran-2-yl)phenyl]oxidanesulfonic acid**', '2.011', 'Cl_hmdb', 'C15H12O11S1'), ('[5,7-dihydroxy-4-oxo-2-(3,4,5-trihydroxyphenyl)-3,4-dihydro-2H-1-benzopyran-3-yl]oxidanesulfonic acid**', '2.011', 'Cl_hmdb', 'C15H12O11S1'), ('{4-[2,3-dioxo-3-(2,4,6-trihydroxyphenyl)propyl]-2,6-dihydroxyphenyl}oxidanesulfonic acid**', '2.011', 'Cl_hm…	Class 3	stable	Class 3	0.000468214	0.000327534	2	5	38	16	42	13
1684	435.876	negative	no	435.875	435.876	26.8941	24.4379	27.9922	[('fenchlorazole-ethyl', 1.0)]	stable	stable	stable	0.000169326	0.000143501	1	0	0	23	33	40
1685	436.869	negative	no	436.868	436.869	26.8912	24.4379	27.9922	436.86851Da/26.89123	stable	stable	stable	0.000242975	0.000248967	0	0	0	77	33	40
1686	436.877	negative	no	436.877	436.878	27.2959	24.8716	28.6305	436.87717Da/27.29589s	stable	stable	stable	0.000130703	0.000122603	0	3	0	23	23	8
1691	438.822	negative	no	438.822	438.823	29.8261	27.977	30.4436	438.82224Da/29.82614	Class 3	Class 3	stable	0.000117329	0.000129259	0	3	0	92	39	22
1692	438.866	negative	no	438.865	438.866	26.8941	24.4379	27.9922	438.86551Da/26.89411s	stable	stable	stable	0.000169184	0.000158348	1	0	0	23	33	40
1693	438.894	negative	no	438.894	438.895	26.3631	25.0782	27.4702	438.89414Da/26.36314	Class 3	stable	stable	8.2247e-05	7.41029e-05	0	1	0	58	79	23
1696	439.162	negative	no	439.161	439.162	330.182	328.552	331.189	[('7,8-dihydroxy-3,4,15-triacetoxyscirpenol**', '1.361', 'M-H_meta', 'C21H28O10')]	stable	stable	stable	0.000127029	0.000121318	0	0	0	83	1	10
1701	440.89	negative	no	440.889	440.89	28.6639	21.9535	29.8797	440.88966Da/28.66394s	stable	stable	stable	0.000925007	0.000706069	10	5	1	6	32	24
1702	441.013	negative	no	441.013	441.014	274.022	272.094	275.108	[('2-[5-[(2-bromo-4-ethoxy-5-methoxyphenyl)methylidene]-3-methyl-4-oxo-2-sulfanylidene-1-imidazolidinyl]acetic acid methyl ester**', '1.484', 'M-H_chebi', 'C17H19Br1N2O5S1')]	stable	stable	stable	0.000557484	0.000396691	3	4	4	16	42	84
1707	442.678	negative	no	442.677	442.678	31.152	29.5043	32.1804	442.67757Da/31.152s	Class 3	Class 2	Class 2	0.000447794	0.000323866	0	8	34	66	23	78
1709	442.834	negative	no	442.834	442.835	29.2616	27.5996	30.505	442.83416Da/29.26159s	Class 3	stable	stable	0.000165251	0.000174379	0	7	1	54	72	58
1710	442.863	negative	no	442.863	442.863	26.8363	25.2841	27.4887	442.86308Da/26.83631s	Class 3	stable	stable	0.000188266	0.000154844	0	7	0	85	94	63
1712	443.01	negative	no	443.01	443.011	273.934	272.094	275.055	443.01043Da/273.93416	stable	stable	stable	0.000565058	0.00039219	5	4	14	16	42	84
1713	443.258	negative	no	443.257	443.258	442.536	441.328	443.264	[('sn-3-O-(geranylgeranyl)glycerol 1-phosphate**', '1.706', 'M-H_lipid', 'C23H41O6P1')]	stable	stable	stable	0.000593518	0.000454186	3	30	0	64	14	26
1715	444.675	negative	no	444.675	444.675	31.152	29.5043	32.1804	444.67459Da/31.152s	Class 2	Class 2	Class 2	0.000408661	0.000384103	1	16	6	27	23	78
1717	445.043	negative	no	445.042	445.044	48.8418	44.9714	53.4319	445.04309Da/48.8418s	Class 2	Class 2	Class 2	0.00134455	0.000850291	32	5	1	26	78	37
1718	445.255	negative	no	445.254	445.255	442.304	440.728	443.117	445.25472Da/442.30424	stable	stable	stable	0.000288361	0.000260176	18	7	0	64	88	74
1719	446.846	negative	no	446.846	446.846	28.9662	28.6924	29.8797	446.8461Da/28.96622s	Class 3	Class 3	Class 3	0.000621653	0.000528734	1	4	5	54	63	57
1720	446.907	negative	no	446.906	446.907	29.1898	21.9535	30.2207	446.90657Da/29.18975s	stable	stable	stable	0.00175753	0.000969114	46	2	44	44	32	36
1721	447.135	negative	no	447.135	447.135	448.108	446.857	448.632	[('staphyloferrin B**', '4.115', 'M-H_chebi', 'C16H24N4O11')]	Class 3	Class 3	Class 3	0.000154858	0.000151722	1	3	0	17	81	25
1722	447.283	negative	no	447.282	447.283	442.128	440.728	442.973	447.28267Da/442.12781s	stable	stable	stable	0.000139321	0.000141967	0	1	0	15	85	75
1724	448.307	negative	no	448.307	448.308	445.625	444.859	454.174	[('deoxycholic acid glycine conjugate', 1.0), ('deoxycholic acid glycine conjugate', 1.0), ('chenodeoxyglycocholic acid', 1.0), ('glycodeoxycholate', 1.0), ('glycochenodeoxycholate', 1.0)]	Class 3	Class 3	Class 3	0.000276521	0.000249473	0	1	0	29	88	73
1725	448.851	negative	no	448.851	448.852	29.8215	28.0087	30.4537	448.85128Da/29.82152s	Class 1	Class 1	Class 1	0.000960532	0.00108095	2	4	3	88	83	57
1726	449.168	negative	no	449.167	449.169	251.397	248.648	252.898	[('N,N-diethyl-4-[[5-oxo-6-(phenylmethyl)-7H-pyrrolo[3,4-b]pyridin-7-yl]amino]benzenesulfonamide**', '4.767', 'M-H_chebi', 'C24H26N4O3S1'), ('N-[[4-(dimethylamino)phenyl]methyl]-3-ethyl-N-(2-furanylmethyl)-5-methyl-4-oxo-6-thieno[2,3-d]pyrimidinecarboxamide**', '4.767', 'M-H_chebi', 'C24H26N4O3S1')]	Class 3	Class 3	Class 3	0.000329165	0.00025657	6	14	2	40	51	94
1728	449.245	negative	no	449.244	449.245	498.157	497.394	498.63	[('lupulone', 1.0)]	stable	Class 3	stable	0.000358131	0.000264559	2	3	1	64	56	72
1730	450.845	negative	no	450.845	450.845	26.8886	24.5171	27.7725	450.84504Da/26.88864s	stable	stable	stable	0.000384206	0.000283411	3	49	1	89	66	65
1732	451.797	negative	no	451.797	451.797	204.24	203.587	207.257	451.79708Da/204.23999s	Class 2	Class 2	stable	0.000798804	0.00057318	1	3	0	11	16	5
1733	452.795	negative	no	452.795	452.795	204.335	202.519	207.666	452.79503Da/204.33464s	Class 2	Class 2	stable	0.00158882	0.000998441	0	3	0	11	16	80
1734	452.845	negative	no	452.845	452.846	26.8964	26.2933	27.4638	452.84548Da/26.8964s	stable	stable	stable	0.000244128	0.000230709	4	2	0	60	96	65
1736	453.286	negative	no	453.286	453.287	442.54	440.728	443.117	[('2-acyl-sn-glycero-3-phosphoethanolamine (n-C16:0)**', '0.620', 'M-H_meta', 'C21H44N1O7P1'), ('lysope(16:0/0:0)**', '0.620', 'M-H_meta', 'C21H44N1O7P1')]	stable	Class 3	stable	0.000416209	0.000449773	26	48	0	16	14	26
1737	453.794	negative	no	453.793	453.794	204.176	202.519	207.257	453.79356Da/204.17604s	Class 2	Class 2	stable	0.000656613	0.000401333	0	2	0	11	16	61
1740	454.792	negative	no	454.792	454.792	204.335	202.519	209.904	454.79186Da/204.33464s	Class 2	Class 2	stable	0.000733804	0.00048551	0	3	0	11	16	10
1741	455.79	negative	no	455.79	455.791	204.228	203.944	207.257	455.79009Da/204.22848s	Class 2	Class 2	stable	0.000339176	0.000294567	0	2	0	11	16	5
1743	457.312	negative	no	457.311	457.312	442.28	440.728	443.117	457.3115Da/442.28043s	stable	stable	stable	0.000115694	9.68312e-05	2	2	0	36	46	8
1745	459.273	negative	no	459.273	459.274	498.133	490.737	498.638	[('hydrocortisone caproate', 1.0), ('lucidenic acid n', 1.0)]	stable	stable	Class 2	0.000593354	0.000479749	2	6	38	64	34	24
1746	462.897	negative	no	462.896	462.897	26.3299	25.313	27.4658	462.8968Da/26.32992s	Class 3	Class 3	Class 3	0.000134876	0.000120586	0	8	5	59	49	23
1747	464.302	negative	no	464.302	464.303	405.098	404.006	405.839	[('3a,7b,12a-trihydroxyoxocholanyl-glycine', 1.0), ('glycocholate', 1.0), ('sodium glycocholate', 1.0)]	Class 3	Class 3	stable	0.000174838	0.000153837	3	1	0	5	81	85
1749	464.893	negative	no	464.893	464.894	26.8964	25.4135	27.4953	464.89285Da/26.8964s	Class 3	Class 2	Class 3	0.00021648	0.000227299	0	4	0	59	29	2
1750	465.24	negative	no	465.239	465.24	442.588	441.328	443.117	[('lmfa01090105', 1.0)]	stable	stable	stable	0.000597595	0.000417315	26	47	0	16	14	26
1751	465.25	negative	no	465.25	465.25	413.411	408.694	414.359	[('etiocholanolone glucuronide', 1.0), ('3-alpha-hydroxy-5-alpha-androstane-17-one 3-d-glucuronide', 1.0)]	Class 3	stable	stable	0.00018516	0.000236271	0	4	0	83	1	49
1752	465.306	negative	no	465.306	465.307	405.085	404.491	405.839	[('cholesterol sulfate**', '2.500', 'M-H_chebi', 'C27H46O4S1')]	Class 3	Class 3	stable	0.000142368	0.000125655	2	1	0	5	14	85
1754	468.692	negative	no	468.691	468.692	30.653	28.9417	31.2428	468.69155Da/30.65301s	Class 3	Class 3	Class 2	0.000144805	0.000137362	0	3	3	46	64	4
1756	469.265	negative	no	469.264	469.265	442.161	440.728	442.973	469.26465Da/442.16104	stable	stable	stable	7.38449e-05	7.88436e-05	2	1	0	15	85	56
1757	471.243	negative	no	471.242	471.243	450.626	445.663	452.218	[('3-Sulfodeoxycholic acid**', '1.415', 'M-H_lipid', 'C24H40O7S1'), ('Chenodeoxycholic acid 3-sulfate**', '1.415', 'M-H_lipid', 'C24H40O7S1'), ('Chenodeoxycholic acid sulfate**', '1.415', 'M-H_lipid', 'C24H40O7S1'), ('Ursodeoxycholic acid 3-sulfate**', '1.415', 'M-H_lipid', 'C24H40O7S1')]	stable	stable	stable	0.000617931	0.000399096	3	6	46	16	80	70
1758	471.243	negative	no	471.243	471.243	425.813	392.54	427.35	[('3-Sulfodeoxycholic acid**', '1.415', 'M-H_lipid', 'C24H40O7S1'), ('Chenodeoxycholic acid 3-sulfate**', '1.415', 'M-H_lipid', 'C24H40O7S1'), ('Chenodeoxycholic acid sulfate**', '1.415', 'M-H_lipid', 'C24H40O7S1'), ('Ursodeoxycholic acid 3-sulfate**', '1.415', 'M-H_lipid', 'C24H40O7S1')]	stable	stable	stable	0.000854284	0.000408925	3	6	50	64	89	18
1759	471.245	negative	no	471.245	471.246	283.772	281.689	284.66	[('laninamivir octanoate', 1.0)]	stable	Class 3	Class 3	0.000194007	0.000147883	4	2	0	13	71	12
1760	472.246	negative	no	472.246	472.246	425.825	424.63	427.241	[('N2,N4-bis[[4-(dimethylamino)phenyl]methylideneamino]-3,5-dimethyl-1H-pyrrole-2,4-dicarboxamide**', '0.959', 'M-H_chebi', 'C26H31N7O2')]	stable	stable	stable	0.00192028	0.00122355	14	13	50	16	34	21
1763	473.146	negative	no	473.146	473.146	334.374	333.253	334.963	[("luteolin 7,3'-dimethyl ether 5-glucoside", 1.0)]	Class 3	Class 2	stable	0.00415462	0.00178525	0	25	3	5	40	11
1764	475.268	negative	no	475.267	475.269	442.525	430.96	443.117	[('Cyclic-3,20-bis(1,2-ethanediyl acetal)-11alpha-(acetyloxy)-5alpha,6alpha-epoxypregnane-3,20-dione**', '2.843', 'M-H_chebi', 'C27H40O7')]	stable	stable	stable	0.000704949	0.000540298	27	27	0	64	14	26
1765	478.874	negative	no	478.874	478.875	26.3301	24.4379	27.4702	478.87437Da/26.33011s	stable	stable	stable	9.45186e-05	0.000119963	0	1	0	58	22	23
1766	479.266	negative	no	479.266	479.266	360.091	358.974	373.725	[('steviolmonoside**', '1.370', 'M-H_meta', 'C26H40O8'), ('19-<i>O</i>-&beta;-glucopyranosyl-steviol**', '1.370', 'M-H_meta', 'C26H40O8')]	stable	Class 3	stable	0.000405013	0.00033669	5	6	1	16	30	96
1767	479.293	negative	no	479.293	479.294	442.172	440.728	442.757	[('emetine**', '3.573', 'M-H_chebi', 'C29H40N2O4'), ('(2S,3R)-2-[(6,7-dimethoxy-1,2,3,4-tetrahydroisoquinolin-1-yl)methyl]-3-ethyl-9,10-dimethoxy-2,3,4,6,7,11b-hexahydro-1H-benzo[a]quinolizine**', '3.573', 'M-H_chebi', 'C29H40N2O4'), ('LSM-6419**', '3.573', 'M-H_chebi', 'C29H40N2O4'), ('(2S,3R)-2-[[(1R)-6,7-dimethoxy-1,2,3,4-tetrahydroisoquinolin-1-yl]methyl]-3-ethyl-9,10-dimethoxy-2,3,4,6,7,11b-…	Class 3	Class 3	stable	9.06536e-05	9.1735e-05	0	4	0	36	21	8
1768	479.876	negative	no	479.876	479.876	26.3804	25.4135	26.8964	479.87606Da/26.38039s	stable	stable	Class 3	0.000100935	8.59944e-05	2	5	0	58	79	38
1769	480.87	negative	no	480.87	480.871	26.8964	24.4379	27.9922	480.87043Da/26.8964s	stable	stable	stable	0.000424618	0.00039482	0	2	7	48	38	2
1770	481.245	negative	no	481.245	481.245	362.018	360.515	362.95	[('11-beta-hydroxyandrosterone-3-glucuronide', 1.0)]	stable	Class 3	stable	0.000651099	0.000554275	2	3	0	83	8	97
1772	482.817	negative	no	482.816	482.817	27.5004	26.1966	28.7073	482.81665Da/27.5004s	stable	stable	stable	0.000510882	0.000450577	5	2	29	23	28	96
1775	486.883	negative	no	486.882	486.883	28.1401	26.7566	29.2787	486.88269Da/28.14013s	stable	stable	Class 3	0.000101477	0.000117817	0	7	1	38	64	55
1776	488.903	negative	no	488.903	488.903	26.2975	24.3105	27.7725	488.90288Da/26.29754s	Class 3	stable	stable	0.000167826	0.000173	0	6	0	28	2	87
1777	489.203	negative	no	489.203	489.203	226.676	224.922	228.073	489.20314Da/226.67616	Class 2	Class 2	stable	0.00809637	0.00269673	0	48	50	16	87	86
1778	491.863	negative	no	491.863	491.863	26.9023	25.0782	27.5087	491.863Da/26.90228s	stable	stable	stable	0.000439639	0.00039566	0	10	10	99	84	53
1779	493.197	negative	no	493.196	493.197	260.314	257.783	262.871	[('[(8S,9S,10R)-6-(2-fluorophenyl)sulfonyl-9-[4-(3-methylphenyl)phenyl]-1,6-diazabicyclo[6.2.0]decan-10-yl]methanol**', '0.093', 'M-H_chebi', 'C28H312O3S1'), ('[(8S,9R,10S)-6-(2-fluorophenyl)sulfonyl-9-[4-(3-methylphenyl)phenyl]-1,6-diazabicyclo[6.2.0]decan-10-yl]methanol**', '0.093', 'M-H_chebi', 'C28H312O3S1'), ('[(8R,9S,10R)-9-[4-(3-fluorophenyl)phenyl]-6-(2-methylphenyl)sulfonyl-1,6-diazabicy…	Class 3	stable	stable	0.00223294	0.0012703	50	14	4	59	21	86
1780	493.245	negative	no	493.245	493.245	429.944	429.687	430.055	[('7,11-bisdeacetylvaltrate 7-(3-methylpentanoate) 11-(3-hydroxy-3-methylbutanoate)', 1.0)]	Class 2	Class 3	stable	0.000534301	0.000404578	0	1	0	71	8	36
1781	494.836	negative	no	494.836	494.838	29.2787	27.2834	30.2037	494.83594Da/29.27873s	stable	Class 1	stable	0.00142892	0.000858577	21	2	18	32	63	25
1782	494.852	negative	no	494.851	494.852	26.3337	24.8549	27.4702	494.85194Da/26.33373s	stable	stable	stable	8.20367e-05	7.96362e-05	0	1	0	58	79	23
1783	495.224	negative	no	495.224	495.224	339.067	338.338	339.937	[('glaucarubin', 1.0)]	stable	stable	stable	0.00184061	0.000867401	3	49	0	83	41	11
1784	496.848	negative	no	496.847	496.849	26.8964	25.313	27.7725	496.84801Da/26.8964s	stable	Class 3	stable	0.000219446	0.000254846	0	7	0	48	38	2
1785	498.29	negative	no	498.29	498.29	418.985	417.524	429.741	[('taurochenodesoxycholic acid**', '0.873', 'M-H_chebi', 'C26H45N1O6S1'), ('tauroursodeoxycholic acid**', '0.873', 'M-H_chebi', 'C26H45N1O6S1'), ('taurodeoxycholic acid**', '0.873', 'M-H_chebi', 'C26H45N1O6S1')]	Class 2	Class 3	stable	0.000167887	0.000122337	0	8	0	27	61	85
1786	499.852	negative	no	499.851	499.853	26.8964	25.0782	28.108	499.85179Da/26.8964s	Class 3	stable	stable	0.000323392	0.000257408	0	2	9	85	33	30
1789	502.86	negative	no	502.859	502.861	28.1264	26.7566	29.2787	502.86026Da/28.12642s	stable	stable	Class 2	0.000172397	0.00012375	0	10	30	51	84	24
1790	504.881	negative	no	504.88	504.881	26.8879	24.4379	27.9922	[('1,8-dichloro-perfluorooctane**', '1.600', 'Cl_chebi', 'C8Cl2F16')]	stable	stable	stable	0.000114161	0.000102602	0	2	0	7	70	40
1791	505.882	negative	no	505.881	505.882	26.847	24.4379	27.9922	505.88203Da/26.84696s	Class 3	stable	stable	0.000172403	0.000133557	0	3	0	28	68	16
1792	506.869	negative	no	506.869	506.87	26.3234	24.3105	27.4702	506.8691Da/26.32337s	stable	stable	stable	8.30516e-05	8.66591e-05	0	3	0	25	22	23
1793	506.878	negative	no	506.878	506.879	26.8285	24.4379	28.0629	[('2-(2,4-dibromophenoxy)-N-[[3-(hydroxymethyl)anilino]-sulfanylidenemethyl]acetamide**', '0.513', 'Cl_chebi', 'C16H14Br2N2O3S1')]	Class 2	Class 3	Class 3	0.000145002	0.000124727	1	1	0	0	68	24
1794	507.871	negative	no	507.87	507.871	26.3098	22.7796	26.8938	507.87064Da/26.30981s	Class 2	Class 2	Class 2	0.000100105	0.000103801	0	2	1	2	63	17
1795	508.877	negative	no	508.877	508.878	28.6282	26.0606	29.4569	[('3,5-diiodothyropropionic acid**', '2.875', 'M-H_chebi', 'C15H12I2O4')]	Class 3	stable	stable	0.000311165	0.00020683	1	3	0	6	7	24
1796	509.001	negative	no	509.001	509.002	273.858	272.984	275.008	[('sulfoglucobrassicin**', '2.424', 'M-H-H2O_chebi', 'C16H20N2O12S3')]	Class 2	Class 3	Class 3	9.9506e-05	8.48611e-05	0	4	1	71	42	84
1798	510.998	negative	no	510.998	510.998	273.915	272.984	275.008	[('LSM-32057**', '3.105', 'Cl_chebi', 'C21H17Cl1N2O5S2')]	Class 3	stable	stable	0.000614425	0.000394738	2	1	3	16	42	33
1799	511.292	negative	no	511.292	511.292	401.021	399.826	401.732	[('(24r)-11alpha,20,24-trihydroxyecdysone', 1.0), ('(25r)-11alpha,20,26-trihydroxyecdysone', 1.0)]	Class 3	Class 3	stable	0.000340956	0.000334653	0	2	0	27	19	89
1800	512.335	negative	no	512.335	512.335	349.078	348.496	350.21	512.3348Da/349.07767s	Class 2	Class 2	Class 2	0.000259645	0.000244379	0	3	0	24	77	7
1802	512.944	negative	no	512.944	512.944	273.838	272.984	275.008	[('2-(2-chloro-4-iodoanilino)-N-(cyclopropylmethoxy)-3,4-difluorobenzamide**', '2.954', 'Cl_chebi', 'C17H14Cl1F22O2')]	Class 3	Class 3	Class 3	0.000361016	0.000325433	0	3	0	16	35	52
1803	514.285	negative	no	514.285	514.285	382.77	380.137	384.035	[('tauro-b-muricholic acid', 1.0), ('taurallocholic acid', 1.0), ('taurohyocholate', 1.0), ('taurocholate', 1.0)]	stable	Class 3	stable	0.000487221	0.00044001	6	2	0	29	88	85
1804	514.894	negative	no	514.894	514.894	29.11	21.9535	29.8877	514.89409Da/29.10997s	stable	Class 1	stable	0.000405478	0.000400377	36	3	5	44	32	51
1805	514.941	negative	no	514.941	514.941	273.858	272.984	275.008	514.94081Da/273.85782s	Class 3	Class 3	Class 3	0.000242407	0.000187788	0	6	0	16	35	74
1806	515.289	negative	no	515.288	515.289	382.77	380.137	384.035	[('l-olivosyl-oleandolide', 1.0)]	Class 3	Class 3	stable	0.000252873	0.000223079	2	1	0	29	88	85
1808	516.281	negative	no	516.281	516.281	382.137	380.137	383.318	[('Mycalamide B**', '1.574', 'M-H_chebi', 'C25H43N1O10')]	Class 1	Class 2	Class 1	0.000321641	0.000283399	3	11	0	75	95	85
1809	516.291	negative	no	516.29	516.291	382.137	380.137	383.318	516.29051Da/382.13651	Class 3	Class 2	Class 1	0.00027522	0.000213876	1	2	0	14	78	85
1810	516.898	negative	no	516.898	516.899	26.8324	24.4379	27.7725	516.89803Da/26.83241s	stable	stable	stable	8.12476e-05	7.95764e-05	0	2	0	7	2	40
1812	517.899	negative	no	517.899	517.9	26.8575	24.4379	27.7725	517.89923Da/26.85752s	stable	stable	stable	0.000116565	0.000132579	0	2	0	7	2	18
1813	518.895	negative	no	518.895	518.895	26.8506	24.4379	27.7725	518.89492Da/26.8506s	stable	stable	stable	0.000122212	0.000140053	0	2	0	7	2	18
1814	520.858	negative	no	520.857	520.859	26.8929	24.4379	28.0268	520.8582Da/26.89295s	stable	stable	stable	0.00031865	0.000260629	0	2	0	0	5	40
1817	522.846	negative	no	522.846	522.847	26.316	24.3105	27.9922	522.84634Da/26.31599s	stable	stable	stable	0.000113907	0.000109971	1	0	0	25	79	76
1818	523.849	negative	no	523.849	523.851	26.3549	25.4135	26.8964	523.84927Da/26.35491s	Class 2	Class 2	Class 2	8.64449e-05	0.000108478	0	3	0	9	49	23
1819	524.843	negative	no	524.842	524.843	26.2908	23.8841	27.4189	524.84284Da/26.29081s	stable	stable	stable	0.000104205	0.000102907	0	1	1	50	30	84
1820	527.09	negative	no	527.089	527.09	36.7146	34.0821	38.5192	527.08963Da/36.71465	Class 2	Class 2	Class 3	0.00447432	0.00183805	0	7	0	41	24	15
1822	532.876	negative	no	532.875	532.876	26.8805	24.4379	27.9922	532.87565Da/26.88055s	stable	stable	stable	0.000120257	0.000123505	0	2	0	7	70	40
1823	533.877	negative	no	533.877	533.879	26.8822	24.4379	27.9922	533.87701Da/26.88225s	stable	stable	stable	0.000113395	0.000136677	0	2	0	7	70	40
1824	534.872	negative	no	534.872	534.873	26.8846	24.4379	27.9922	534.87232Da/26.88464s	stable	stable	stable	7.57557e-05	7.81548e-05	0	2	0	7	70	40
1825	535.874	negative	no	535.874	535.875	26.8834	24.4379	27.7725	535.87419Da/26.88344s	Class 3	stable	stable	0.000101918	0.000109473	0	2	0	92	70	52
1827	536.868	negative	no	536.868	536.869	26.8788	24.4379	27.9922	536.86843Da/26.87885s	stable	stable	stable	0.000127604	0.00010833	1	2	0	92	2	52
1829	538.824	negative	no	538.823	538.824	26.2975	23.8841	27.7725	538.82394Da/26.29754s	stable	stable	stable	6.9213e-05	7.52199e-05	0	0	0	0	31	18
1830	539.139	negative	no	539.139	539.14	40.1424	36.4824	48.2821	[('panose', 1.0), ('nephritogenoside', 1.0)]	Class 2	Class 2	Class 2	0.000323695	0.000366368	0	7	1	20	27	13
1831	539.251	negative	no	539.25	539.251	344.606	343.19	355.166	[('tetrahydroaldosterone-3-glucuronide', 1.0)]	stable	stable	stable	0.00024233	0.000202148	1	3	0	37	1	98
1834	540.821	negative	no	540.82	540.821	26.2975	24.3105	27.4189	540.82087Da/26.29754s	stable	stable	stable	0.000108014	0.000122781	0	1	0	0	31	18
1836	541.266	negative	no	541.266	541.266	337.937	336.832	352.806	[('cortolone-3-glucuronide', 1.0)]	stable	stable	stable	0.000390626	0.000363455	1	4	0	83	1	10
1837	542.854	negative	no	542.853	542.854	26.8964	25.9808	27.4953	542.85368Da/26.8964s	Class 2	Class 3	Class 2	0.000194445	0.000200367	0	3	0	59	4	58
1839	548.853	negative	no	548.853	548.854	26.8928	24.4379	27.9922	548.85319Da/26.8928s	stable	stable	stable	0.000249746	0.000224931	0	2	0	60	5	40
1840	549.855	negative	no	549.854	549.855	26.8925	24.4379	27.9922	549.85507Da/26.89252s	stable	stable	stable	0.000279246	0.000305625	0	2	0	60	5	18
1841	550.849	negative	no	550.849	550.85	26.8926	24.4379	27.9922	550.84941Da/26.89264s	stable	stable	stable	0.000341	0.000339785	0	0	0	60	5	40
1842	551.853	negative	no	551.853	551.854	27.0194	26.537	27.4891	551.85314Da/27.01944s	stable	Class 3	stable	7.79642e-05	7.93421e-05	0	3	0	60	7	30
1843	552.846	negative	no	552.845	552.846	26.8926	24.4379	27.9922	552.84581Da/26.89264s	stable	stable	stable	0.000230196	0.000289373	0	0	0	60	5	40
1845	553.848	negative	no	553.847	553.848	26.8964	25.2841	27.9922	553.84769Da/26.8964s	stable	stable	stable	0.000110547	0.000117513	0	4	11	53	53	87
1847	554.802	negative	no	554.801	554.802	26.4165	24.4379	27.7725	554.80179Da/26.41653s	stable	stable	stable	0.000113952	0.00012736	0	0	0	77	90	18
1848	556.798	negative	no	556.798	556.799	26.537	24.5171	26.9306	556.79848Da/26.53695s	stable	stable	stable	0.000133164	0.000124752	0	4	0	23	64	9
1850	556.842	negative	no	556.842	556.843	26.8944	24.4379	27.9922	556.84202Da/26.89442s	stable	stable	stable	0.000152305	0.000139385	0	0	0	23	17	81
1851	557.343	negative	no	557.343	557.344	26.9283	25.0782	28.0629	557.34321Da/26.92829	stable	stable	Class 3	9.75499e-05	0.000127987	0	0	0	3	26	57
1852	557.841	negative	no	557.841	557.842	26.8625	25.0782	27.5062	557.84131Da/26.86246s	stable	Class 3	Class 3	0.000306732	0.00032027	0	2	0	3	63	46
1854	564.831	negative	no	564.83	564.832	26.8929	24.4379	27.9922	564.83069Da/26.89295s	stable	stable	stable	0.000204109	0.000189239	0	0	0	23	33	40
1855	565.332	negative	no	565.332	565.333	26.6702	25.0782	28.0034	[('Protoxylocarpin A**', '3.730', 'Cl_chebi', 'C32H50O6'), ('Protoxylocarpin B**', '3.730', 'Cl_chebi', 'C32H50O6'), ('3-O-acetyluncaric acid**', '3.730', 'Cl_chebi', 'C32H50O6'), ('combretic acid B**', '3.730', 'Cl_chebi', 'C32H50O6')]	stable	Class 3	Class 3	0.000162318	0.000137231	0	1	0	22	86	45
1856	565.834	negative	no	565.833	565.835	26.8931	24.4379	27.9922	565.83417Da/26.89314s	stable	stable	stable	0.000163386	0.000170289	0	0	0	23	33	40
1857	566.826	negative	no	566.825	566.827	26.8846	24.4379	27.9922	566.82613Da/26.88464s	stable	stable	stable	0.000232963	0.000227592	0	3	0	85	17	81
1858	566.836	negative	no	566.835	566.837	26.8964	24.8716	27.9922	566.83566Da/26.8964s	stable	stable	stable	0.000167984	0.000181789	1	2	0	85	33	44
1859	568.823	negative	no	568.823	568.824	26.8926	24.4379	27.9922	568.82349Da/26.89264s	stable	stable	stable	0.000210337	0.000240501	0	0	0	23	33	18
1862	570.848	negative	no	570.847	570.848	28.4539	27.2834	29.8381	570.84774Da/28.45389s	stable	stable	stable	0.000605861	0.000419392	3	2	0	17	61	55
1865	576.865	negative	no	576.864	576.865	28.5766	26.9961	29.4569	576.86466Da/28.57662s	Class 3	Class 3	Class 3	0.000776398	0.000497649	1	2	0	6	47	57
1867	580.803	negative	no	580.803	580.804	26.8964	25.8048	26.9487	580.80301Da/26.8964s	Class 3	stable	stable	0.000373202	0.000218716	2	13	0	28	23	50
1869	582.804	negative	no	582.804	582.804	26.8964	26.2961	27.4638	582.80375Da/26.8964s	Class 3	Class 3	stable	0.000224955	0.000191984	1	2	0	39	7	16
1870	582.882	negative	no	582.881	582.882	28.9649	21.9535	29.8877	582.88156Da/28.96488s	stable	stable	Class 1	0.000483176	0.000408605	4	3	0	19	32	58
1872	589.304	negative	no	589.303	589.304	343.732	342.377	382.096	[('d-urobilinogen', 1.0), ('urobilin', 1.0), ('i-urobilin', 1.0)]	stable	stable	stable	0.000224917	0.00021546	1	2	0	64	80	21
1874	590.307	negative	no	590.307	590.308	343.568	342.803	344.354	[('2-[(5Z,13E,15S)-11alpha,15-dihydroxy-9-oxoprosta-5,13-dien-1-oyl]-sn-glycero-3-phosphocholine**', '4.032', 'M-H_chebi', 'C28H50N1O10P1'), ('2-[(9S,11R)-epidioxy-(15S)-hydroxy-(5Z,13E)-prostadienoyl]-sn-glycero-3- phosphocholine**', '4.032', 'M-H_chebi', 'C28H50N1O10P1')]	stable	stable	stable	0.000178984	0.00015982	2	4	0	13	80	77
1875	591.32	negative	no	591.319	591.32	342.638	341.186	343.861	[('mesobilirubinogen', 1.0), ('i-urobilinogen', 1.0)]	stable	stable	stable	0.000219179	0.00023786	0	0	0	64	89	70
1876	592.323	negative	no	592.322	592.323	342.685	341.86	343.781	[('PHOHA-PE**', '4.367', 'M-H_lipid', 'C28H52N1O10P1'), ('OG-PE**', '4.367', 'M-H_lipid', 'C28H52N1O10P1')]	stable	Class 3	Class 3	0.000254279	0.00028093	0	1	0	64	89	24
1877	592.855	negative	no	592.855	592.856	26.3073	25.4135	26.8964	592.85543Da/26.3073s	Class 2	Class 2	Class 3	0.000159138	0.000140081	0	6	4	35	64	57
1878	593.335	negative	no	593.334	593.335	344.345	342.008	345.627	[('l-urobilin', 1.0)]	Class 3	stable	stable	0.000235921	0.000218945	0	1	0	64	89	75
1879	594.339	negative	no	594.338	594.339	344.349	342.008	345.627	[('PS-PC**', '4.453', 'M-H_lipid', 'C28H54N1O10P1')]	stable	stable	stable	0.000200065	0.000230027	1	4	0	64	89	98
1880	595.342	negative	no	595.341	595.342	344.14	343.251	344.934	[('vitamin d3 glucosiduronate', 1.0)]	Class 3	stable	Class 3	0.000315479	0.000306652	0	2	2	5	48	3
1883	605.843	negative	no	605.843	605.844	26.8951	25.0782	27.9922	605.8435Da/26.89514s	stable	stable	stable	0.000123083	0.00011347	0	5	0	60	59	3
1884	606.344	negative	no	606.344	606.345	26.9337	26.4486	27.5087	606.34414Da/26.93372	Class 3	Class 2	Class 2	0.000118912	0.000120247	0	3	0	53	26	44
1885	606.843	negative	no	606.842	606.843	26.9134	25.9635	27.5073	606.84274Da/26.91336s	stable	stable	Class 3	0.00044662	0.000388599	0	18	42	3	45	16
1886	608.832	negative	no	608.832	608.833	26.3307	24.8549	26.9688	608.8323Da/26.33073s	stable	stable	stable	0.000112759	0.000107355	2	1	0	25	79	23
1887	609.33	negative	no	609.329	609.33	330.768	328.045	332.358	609.32999Da/330.76776	stable	Class 3	stable	0.000401351	0.000329435	4	2	0	71	46	36
1888	609.834	negative	no	609.834	609.835	26.4307	25.8113	26.8938	609.83447Da/26.43074s	Class 3	stable	stable	0.000107415	0.000102574	0	6	0	63	38	23
1889	610.828	negative	no	610.828	610.829	26.8964	25.8333	28.6942	610.82834Da/26.89641s	Class 3	stable	stable	0.000127955	0.000155409	0	2	0	28	29	2
1890	612.775	negative	no	612.775	612.776	27.8782	26.1966	28.6525	612.77536Da/27.87817s	stable	stable	stable	0.00158376	0.000850428	43	2	4	81	60	30
1891	613.832	negative	no	613.832	613.833	26.8944	24.4379	27.9922	613.83212Da/26.89442s	stable	stable	stable	0.000149832	0.000144911	0	3	0	60	5	81
1892	614.333	negative	no	614.333	614.334	26.8944	24.4379	27.9922	[('1-[[(2R,3R)-9-[[(cyclohexylamino)-oxomethyl]amino]-5-[(2R)-1-hydroxypropan-2-yl]-3-methyl-6-oxo-2,3,4,7-tetrahydro-1,5-benzoxazonin-2-yl]methyl]-1-methyl-3-(1-naphthalenyl)urea**', '2.672', 'M-H_chebi', 'C35H45N5O5'), ('1-[[(2R,3R)-9-[[(cyclohexylamino)-oxomethyl]amino]-5-[(2S)-1-hydroxypropan-2-yl]-3-methyl-6-oxo-2,3,4,7-tetrahydro-1,5-benzoxazonin-2-yl]methyl]-1-methyl-3-(1-naphthalenyl)urea…	stable	stable	stable	0.00013277	0.000188245	0	3	0	53	5	81
1893	614.832	negative	no	614.831	614.833	26.8958	24.4379	27.9922	614.83177Da/26.89585s	stable	stable	stable	0.000159173	0.00020472	0	1	0	60	5	45
1894	615.332	negative	no	615.332	615.333	26.9402	25.313	27.5087	[('Ile-Leu-Trp-Trp**', '4.228', 'M-H_chebi', 'C34H44N6O5')]	stable	Class 3	Class 3	0.000314202	0.000315803	3	9	0	99	81	44
1895	615.829	negative	no	615.828	615.83	26.8964	25.2841	27.5087	615.8288Da/26.8964s	stable	stable	stable	0.000157411	0.000189659	0	1	1	60	26	60
1896	616.808	negative	no	616.807	616.808	26.8324	25.0782	28.108	616.80754Da/26.83241s	stable	stable	stable	0.000386385	0.00035678	0	1	2	23	28	16
1897	618.861	negative	no	618.86	618.862	26.7797	24.4379	27.5062	618.86102Da/26.7797s	stable	stable	stable	8.86512e-05	0.000101999	0	2	0	7	2	18
1898	619.862	negative	no	619.862	619.863	26.805	24.3105	27.5062	619.86235Da/26.80497s	stable	stable	stable	9.5092e-05	9.5111e-05	0	1	0	7	2	45
1899	620.859	negative	no	620.858	620.86	26.7904	24.3105	27.7725	620.85862Da/26.79043	Class 2	Class 3	Class 3	0.000110651	0.000115695	1	1	0	84	45	24
1900	621.821	negative	no	621.82	621.821	26.8944	24.4379	27.9922	621.82089Da/26.89441s	stable	stable	stable	0.000161726	0.000163855	0	0	0	23	33	81
1901	622.322	negative	no	622.322	622.323	26.8964	24.8716	27.9922	[('(3a,5b,7a,12a)-24-[(carboxymethyl)amino]-1,12-dihydroxy-24-oxocholan-3-yl-b-D-Glucopyranosiduronic acid**', '0.717', 'M-H-H2O_chebi', 'C32H51N1O12')]	stable	stable	stable	0.000138231	0.000156517	0	0	0	23	33	9
1902	622.821	negative	no	622.82	622.822	26.8964	25.0782	27.9922	622.82071Da/26.8964s	stable	stable	stable	0.000586823	0.000393419	0	5	17	23	33	16
1904	623.817	negative	no	623.817	623.818	26.8964	22.7796	27.5087	623.81725Da/26.8964s	stable	stable	stable	0.000327468	0.000311696	0	4	22	99	17	16
1905	624.81	negative	no	624.809	624.811	26.3337	25.0782	27.4658	624.80973Da/26.33373s	stable	stable	stable	7.24667e-05	7.26579e-05	3	0	0	25	79	23
1906	626.806	negative	no	626.805	626.806	26.8964	25.8333	27.4953	626.8056Da/26.8964s	Class 2	stable	stable	0.000115038	0.000126752	1	4	0	25	38	23
1907	629.81	negative	no	629.809	629.811	26.8964	24.4379	27.9922	629.80962Da/26.8964s	stable	stable	stable	0.00022771	0.000167683	0	0	0	85	33	81
1908	630.311	negative	no	630.311	630.312	26.9351	25.0782	28.0034	630.31126Da/26.93511	stable	Class 3	stable	0.00061001	0.000467839	2	8	0	81	84	57
1909	631.806	negative	no	631.806	631.806	26.8938	25.0782	27.4953	631.80597Da/26.89382s	stable	stable	Class 3	0.000457709	0.000477774	0	5	13	85	99	45
1910	632.205	negative	no	632.204	632.206	40.3667	36.8874	42.8578	[("3'-sialyllactose", 1.0), ("6'-sialyllactose", 1.0)]	Class 2	Class 2	Class 2	0.000671952	0.000686831	1	5	0	27	65	63
1912	634.839	negative	no	634.838	634.839	26.8788	24.4379	27.9922	634.83858Da/26.87885s	stable	stable	stable	9.97137e-05	0.000140483	0	2	0	92	70	40
1913	635.84	negative	no	635.84	635.841	26.8645	24.4379	27.7725	635.84025Da/26.86452s	stable	stable	stable	0.000251483	0.000256607	2	5	0	19	70	46
1916	636.837	negative	no	636.836	636.838	26.8958	24.4379	27.9922	636.83672Da/26.89585s	Class 3	Class 3	stable	0.000149294	0.000124937	0	4	0	53	45	74
1917	636.838	negative	no	636.838	636.839	26.8905	25.8979	26.9688	636.83775Da/26.89052s	Class 3	Class 3	Class 3	0.000146291	0.000109436	0	2	0	3	55	38
1918	638.835	negative	no	638.834	638.835	28.4532	26.0588	29.2273	638.83467Da/28.45321s	stable	stable	stable	0.000996173	0.000554412	50	13	1	6	32	37
1921	650.816	negative	no	650.816	650.817	26.8912	24.4379	27.9922	650.81631Da/26.89123s	stable	stable	stable	0.000203627	0.000217284	0	2	0	60	17	40
1922	651.819	negative	no	651.818	651.82	26.8919	24.4379	27.9922	651.81888Da/26.89193s	stable	stable	stable	0.000121056	0.000129714	0	21	0	60	5	59
1923	652.811	negative	no	652.81	652.812	26.8964	25.4103	27.5062	652.8109Da/26.8964s	Class 3	stable	stable	9.72752e-05	0.000129656	0	3	0	87	74	50
1924	652.813	negative	no	652.812	652.814	26.8986	24.4379	28.0548	652.81251Da/26.89864s	Class 3	Class 3	Class 3	0.000208051	0.000175437	0	1	0	53	74	21
1925	654.809	negative	no	654.809	654.81	27.4876	24.9916	28.1095	654.80912Da/27.48763s	stable	stable	stable	0.000126478	9.60104e-05	0	3	0	22	10	19
1926	656.825	negative	no	656.825	656.825	27.0701	26.7904	27.9046	656.82486Da/27.07011s	Class 3	Class 3	stable	0.000109213	0.000115897	0	2	0	92	48	24
1929	662.834	negative	no	662.833	662.834	26.8879	24.4379	27.9922	662.83358Da/26.88793s	stable	stable	stable	0.000254257	0.000246047	1	2	0	92	70	45
1930	663.334	negative	no	663.334	663.335	26.824	25.313	27.5087	663.33438Da/26.82402	Class 3	Class 3	Class 2	0.000154929	0.000175457	0	3	0	92	93	57
1931	663.835	negative	no	663.834	663.835	26.8751	24.4379	27.9922	663.8348Da/26.87506s	stable	stable	stable	8.58907e-05	9.16403e-05	0	3	0	92	70	18
1932	664.832	negative	no	664.831	664.832	26.8834	24.4379	27.9922	664.83164Da/26.88344s	Class 3	stable	stable	0.000148513	0.000155189	0	2	0	85	70	18
1933	665.809	negative	no	665.808	665.81	26.7583	24.7455	27.4638	665.80857Da/26.75826s	stable	stable	Class 3	0.000241168	0.000181544	0	9	20	70	7	21
1934	666.347	negative	no	666.347	666.348	290.132	287.615	291.779	666.34745Da/290.13226	Class 2	Class 2	stable	0.00304667	0.00101684	0	31	48	29	88	94
1935	666.808	negative	no	666.808	666.809	26.7819	25.313	28.0034	666.80813Da/26.78191s	Class 3	stable	Class 3	0.00010173	0.000108325	0	6	1	99	45	94
1936	668.783	negative	no	668.782	668.784	26.2157	23.8841	26.9043	668.78292Da/26.21575s	Class 3	Class 3	Class 3	9.20586e-05	0.000102896	0	1	0	92	30	52
1937	668.786	negative	no	668.785	668.787	26.8202	25.313	28.0034	668.78558Da/26.82022s	stable	stable	stable	0.000113987	0.000102601	0	4	0	33	63	8
1938	668.789	negative	no	668.788	668.79	26.912	25.9808	28.108	668.78893Da/26.91199s	stable	stable	stable	0.00011604	9.77491e-05	1	1	0	58	10	58
1939	668.79	negative	no	668.79	668.791	26.9321	26.8929	27.9295	668.78996Da/26.9321s	Class 2	Class 2	Class 2	0.000511163	0.000347112	0	15	0	21	28	2
1940	670.779	negative	no	670.778	670.779	26.2194	24.5171	26.904	670.77886Da/26.21938s	Class 3	Class 2	stable	9.3281e-05	7.68159e-05	0	5	3	85	69	30
1941	670.822	negative	no	670.822	670.823	26.8951	24.4379	27.9922	670.82232Da/26.89514s	Class 3	stable	stable	0.000182766	0.000264711	0	1	0	92	26	81
1942	671.323	negative	no	671.323	671.324	26.8958	24.4379	27.9922	[('withalongolide J**', '4.397', 'Cl_chebi', 'C34H52O11')]	stable	stable	Class 3	0.000321837	0.000276239	0	2	0	92	26	81
1943	671.822	negative	no	671.821	671.823	26.8944	24.4379	27.9922	[('iopronic acid**', '4.004', 'M-H_chebi', 'C15H18I3N1O5')]	stable	stable	stable	0.000259854	0.000250547	0	1	0	60	68	81
1944	672.323	negative	no	672.322	672.323	26.8929	24.8716	27.9922	672.3226Da/26.89289s	Class 3	stable	Class 3	0.000100042	0.000101551	0	2	0	53	74	53
1945	672.82	negative	no	672.82	672.821	26.9169	25.313	28.0034	672.82027Da/26.91685s	Class 3	Class 3	Class 3	5.55392e-05	6.43013e-05	0	0	0	53	11	30
1948	673.797	negative	no	673.797	673.799	26.8487	24.4379	27.9922	[('bunamiodyl**', '2.595', 'Cl_chebi', 'C15H16I3N1O3')]	stable	stable	stable	0.000130799	0.000116141	0	3	0	23	28	52
1949	674.298	negative	no	674.297	674.298	26.4919	25.0782	27.4638	674.29795Da/26.49187s	stable	stable	Class 3	0.000168307	0.000208054	0	3	0	90	20	53
1950	674.796	negative	no	674.796	674.797	26.8649	24.4379	27.9922	674.79649Da/26.8649s	stable	stable	stable	9.22404e-05	9.65886e-05	0	2	0	53	74	24
1951	678.811	negative	no	678.811	678.812	26.8928	24.4379	27.9922	678.81111Da/26.8928s	stable	stable	stable	0.000232731	0.000266942	0	3	0	60	17	81
1952	679.312	negative	no	679.312	679.313	26.8951	24.4379	27.9922	679.31206Da/26.89514	stable	stable	stable	0.000128991	0.000159348	0	0	0	60	17	45
1953	679.812	negative	no	679.812	679.813	26.8928	24.4379	27.9922	679.81248Da/26.8928s	stable	stable	stable	0.000591154	0.000547897	2	0	0	3	17	46
1954	680.312	negative	no	680.311	680.312	26.8964	25.2841	27.7725	680.3115Da/26.8964s	stable	stable	Class 3	0.000171787	0.000157846	1	5	3	99	28	12
1955	680.808	negative	no	680.807	680.808	26.8919	24.4379	27.9922	680.80771Da/26.89193s	stable	stable	stable	0.000226509	0.000240076	0	0	0	53	17	52
1956	681.309	negative	no	681.308	681.309	26.8363	25.0782	28.0034	[('6-{[(1R,16S)-5,7-dihydroxy-8,8,10,12,16-pentamethyl-3-[1-(2-methyl-1,3-thiazol-4-yl)prop-1-en-2-yl]-9-oxo-17-oxa-4-azabicyclo[14.1.0]heptadec-4-en-11-yl]oxy}-3,4,5-trihydroxyoxane-2-carboxylic acid**', '3.626', 'M-H_hmdb', 'C33H50N2O11S1'), ('6-{[(1S,16R)-5,11-dihydroxy-8,8,10,12,16-pentamethyl-3-[1-(2-methyl-1,3-thiazol-4-yl)prop-1-en-2-yl]-9-oxo-17-oxa-4-azabicyclo[14.1.0]heptadec-4-en-7-yl]…	Class 3	stable	Class 3	7.87364e-05	8.50589e-05	0	2	0	53	99	44
1957	681.786	negative	no	681.785	681.787	26.824	25.0782	27.5085	681.78584Da/26.82402s	Class 3	stable	stable	0.000324645	0.000275823	1	3	0	20	90	16
1958	681.787	negative	no	681.787	681.788	27.0564	26.8926	28.108	681.78689Da/27.05637s	stable	stable	stable	0.000541069	0.000427748	0	2	0	81	17	57
1960	682.785	negative	no	682.785	682.786	26.685	25.0782	27.5073	682.78489Da/26.68498s	stable	stable	stable	0.000759628	0.000464631	0	6	7	22	90	44
1961	682.804	negative	no	682.803	682.805	26.8788	24.4379	27.9922	682.8041Da/26.87885s	stable	stable	stable	0.000246333	0.000251776	0	0	0	60	17	45
1962	684.76	negative	no	684.759	684.76	26.3897	24.4379	27.9922	[('amidotrizoic acid dihydrate**', '0.988', 'Cl_chebi', 'C11H13I3N2O6')]	stable	stable	stable	0.000198312	0.000160374	0	8	0	9	90	3
1963	686.8	negative	no	686.799	686.8	26.8951	24.4379	27.9922	686.7998Da/26.89514s	stable	stable	stable	0.000209225	0.000218576	0	0	0	23	33	81
1964	687.301	negative	no	687.3	687.302	26.8964	24.987	27.9922	[('N-[(3R,9S,10S)-12-[(2S)-1-hydroxypropan-2-yl]-3,10-dimethyl-9-[[methyl(pyridin-4-ylmethyl)amino]methyl]-13-oxo-2,8-dioxa-12-azabicyclo[12.4.0]octadeca-1(14),15,17-trien-16-yl]-4-methylbenzenesulfonamide**', '3.983', 'Cl_chebi', 'C35H48N4O6S1')]	stable	stable	stable	0.000374137	0.000307727	0	1	0	23	33	53
1965	687.8	negative	no	687.799	687.8	26.8964	24.8716	27.7725	687.79967Da/26.8964s	stable	stable	stable	0.000134175	0.000132008	0	0	0	23	33	45
1966	688.3	negative	no	688.3	688.301	26.8285	25.0782	28.0034	688.30044Da/26.82851s	Class 3	stable	Class 3	0.000162221	0.000147327	0	2	0	81	33	34
1967	688.796	negative	no	688.796	688.797	26.8964	25.313	27.7725	688.79635Da/26.8964s	stable	stable	Class 3	0.000160469	0.00017537	0	4	0	99	33	30
1968	694.789	negative	no	694.788	694.789	26.8937	24.4379	27.9922	694.78866Da/26.89368s	stable	stable	stable	0.00044029	0.000309339	0	1	0	23	33	81
1969	695.29	negative	no	695.29	695.29	26.8944	25.4103	28.0034	[('DY-730**', '3.532', 'Cl_chebi', 'C38H48N2O6S1')]	Class 3	Class 3	Class 2	0.000185509	0.000178105	0	4	8	85	95	45
1970	695.792	negative	no	695.791	695.792	26.8929	24.4379	27.9922	695.79193Da/26.89295s	stable	stable	stable	0.000268411	0.000218799	1	1	0	23	33	18
1971	696.785	negative	no	696.785	696.786	26.8285	23.9673	27.4887	696.78535Da/26.82851s	Class 3	Class 1	Class 1	0.000446147	0.000363506	0	16	26	3	90	94
1973	698.782	negative	no	698.781	698.782	26.8944	24.4379	27.9922	698.78157Da/26.89441s	stable	stable	stable	0.000217251	0.000183733	0	0	0	85	33	81
1976	706.823	negative	no	706.823	706.824	28.4002	26.0588	28.7128	706.82333Da/28.40017s	stable	Class 3	stable	0.00162725	0.000942504	6	3	9	38	71	55
1977	713.815	negative	no	713.814	713.816	26.8926	25.313	27.5073	713.81526Da/26.89264s	Class 3	Class 3	stable	0.000143251	0.00015568	0	4	0	92	7	3
1978	714.316	negative	no	714.316	714.317	26.8324	25.313	27.4421	[('anthropyranosyl-(1->3)-Rhap-(1->3)-Rhap-(1->2)-Rhap**', '3.556', 'M-H_chebi', 'C30H53N1O18')]	Class 3	stable	stable	0.000116115	0.000125701	1	2	1	92	68	53
1979	714.815	negative	no	714.815	714.816	26.8932	26.7622	27.5085	714.81492Da/26.89323s	Class 3	Class 3	stable	7.89636e-05	8.71008e-05	0	2	0	98	45	16
1982	721.804	negative	no	721.803	721.804	26.8965	25.6921	28.1153	721.80357Da/26.8965s	stable	Class 3	Class 3	0.000132804	0.000107187	1	3	0	53	26	12
1984	727.812	negative	no	727.812	727.813	26.8944	24.4379	27.9922	727.8125Da/26.89441s	Class 3	stable	stable	0.000119828	0.00011038	0	3	0	92	68	45
1985	728.313	negative	no	728.313	728.314	26.893	24.4379	27.9922	728.31338Da/26.89304	stable	stable	stable	0.000112591	9.22852e-05	0	3	0	92	62	45
1986	728.812	negative	no	728.812	728.813	26.8958	24.8716	27.9922	728.81224Da/26.89585s	Class 3	stable	stable	0.000150245	0.000157398	0	0	0	92	2	24
1987	729.313	negative	no	729.312	729.313	26.8929	24.987	28.0034	729.31273Da/26.89289	Class 3	Class 3	Class 3	0.00014097	0.000144721	0	3	0	92	83	53
1988	729.811	negative	no	729.81	729.812	26.8416	25.313	27.5087	729.81106Da/26.84164s	stable	stable	stable	0.000156935	0.000190788	0	4	1	92	70	87
1989	730.788	negative	no	730.787	730.789	26.8285	25.0782	27.5087	730.78799Da/26.82851s	stable	stable	Class 3	0.000157306	0.000167727	0	4	0	3	64	57
1990	731.787	negative	no	731.786	731.788	26.7643	24.4379	27.9922	731.78682Da/26.76433s	Class 3	stable	Class 3	8.85182e-05	0.000109598	1	2	0	98	9	24
1991	735.801	negative	no	735.801	735.802	26.8951	24.4379	27.9922	735.80126Da/26.89514s	stable	stable	stable	0.000259516	0.000318769	0	1	0	53	26	81
1992	736.302	negative	no	736.302	736.303	26.8964	24.4379	27.9922	736.30223Da/26.8964s	stable	stable	stable	0.00024018	0.000397098	0	0	0	53	26	45
1993	736.801	negative	no	736.801	736.802	26.8951	24.4379	27.9922	736.80107Da/26.89514s	stable	stable	Class 3	0.000133097	0.000174009	0	2	0	60	11	21
1994	737.302	negative	no	737.301	737.302	26.8931	24.8716	27.9922	737.30159Da/26.89314s	stable	stable	Class 2	0.000199337	0.000200352	0	4	1	60	26	45
1995	737.799	negative	no	737.799	737.8	26.8964	25.0782	27.9922	737.79925Da/26.8964s	Class 3	stable	stable	0.000151865	0.000173208	0	1	0	3	74	46
1996	738.299	negative	no	738.299	738.3	26.8964	26.4486	28.0034	738.29929Da/26.8964	Class 3	stable	Class 3	0.000136999	0.000156521	0	3	0	53	7	57
1998	738.792	negative	no	738.791	738.792	26.3475	25.4135	26.9222	738.79165Da/26.34751s	Class 2	Class 2	Class 3	0.000154318	0.000154311	0	6	0	25	61	23
1999	738.794	negative	no	738.793	738.795	26.7621	25.2841	27.5062	738.79357Da/26.76207s	Class 2	Class 3	Class 3	0.000125304	9.88859e-05	1	4	0	63	49	19
2000	739.775	negative	no	739.775	739.776	26.745	25.0782	27.5073	739.77534Da/26.74498s	stable	Class 3	Class 2	0.000286303	0.000277528	0	3	2	85	31	30
2001	743.79	negative	no	743.789	743.791	26.8951	24.4379	27.9922	743.79003Da/26.89514s	stable	stable	stable	0.00021078	0.000178694	0	1	0	3	17	81
2002	744.291	negative	no	744.29	744.292	26.8964	24.4379	27.9922	744.29108Da/26.8964	stable	stable	stable	0.000187643	0.000190683	0	0	0	3	17	81
2003	744.79	negative	no	744.789	744.791	26.8964	24.4379	27.9922	744.7899Da/26.8964s	stable	stable	stable	0.000113307	0.000160402	0	1	0	3	17	81
2004	745.29	negative	no	745.29	745.291	26.8964	25.0782	28.0034	745.29048Da/26.8964	stable	stable	Class 3	0.000128361	0.000147097	0	1	0	85	0	4
2005	745.787	negative	no	745.786	745.787	26.8964	25.0782	27.5087	745.78691Da/26.8964s	stable	stable	Class 3	0.000174264	0.000192143	0	2	10	3	28	57
2006	746.288	negative	no	746.287	746.288	27.0052	25.0782	28.0034	746.28772Da/27.00518s	Class 3	Class 2	Class 3	0.000234641	0.000237984	1	6	0	53	55	16
2007	746.766	negative	no	746.765	746.766	26.9614	25.0782	27.4917	746.76572Da/26.96141s	stable	Class 3	stable	0.000220783	0.000187459	2	3	3	81	63	17
2008	746.801	negative	no	746.8	746.801	28.5327	26.0606	29.6937	746.80063Da/28.5327s	stable	stable	stable	0.000225489	0.00020964	3	2	19	69	47	95
2009	748.819	negative	no	748.819	748.82	26.7643	24.4379	27.9922	748.81921Da/26.76433s	stable	stable	stable	0.000106961	0.000104081	0	2	0	60	68	45
2010	751.779	negative	no	751.778	751.779	26.8964	24.4379	27.9922	751.77868Da/26.8964s	stable	stable	stable	0.000333053	0.000254054	0	0	0	23	33	81
2011	752.28	negative	no	752.279	752.281	26.8965	25.0782	28.0034	[('Phyllanthusol B**', '4.364', 'M-H-H2O_hmdb', 'C35H49N1O18')]	stable	stable	stable	0.000263015	0.000279577	0	3	0	85	33	46
2012	752.779	negative	no	752.778	752.78	26.8964	25.0782	27.5087	752.77853Da/26.8964s	stable	Class 3	Class 3	0.000193751	0.000188906	0	3	0	3	63	45
2013	753.775	negative	no	753.775	753.776	26.9107	23.3732	27.5087	753.77517Da/26.91066s	stable	Class 3	Class 2	0.000329159	0.000293026	0	2	19	23	55	30
2014	754.768	negative	no	754.768	754.769	26.5095	25.9808	26.9122	754.76835Da/26.50952s	Class 2	Class 2	Class 2	0.000258824	0.000267507	2	39	2	35	79	58
2015	754.77	negative	no	754.769	754.77	26.3475	26.2961	27.4638	754.76951Da/26.34751s	Class 2	Class 3	Class 3	8.32871e-05	8.58505e-05	0	4	0	63	79	23
2016	759.767	negative	no	759.767	759.769	27.0148	25.0782	28.0629	759.7674Da/27.01477s	stable	stable	Class 3	0.000923143	0.000609885	0	6	33	85	0	24
2017	764.797	negative	no	764.796	764.798	26.8751	24.4379	28.0268	764.79689Da/26.87506s	stable	stable	stable	0.000111009	0.000141857	0	1	0	92	70	81
2019	766.79	negative	no	766.789	766.791	26.9062	26.0359	27.4638	766.79011Da/26.90621s	stable	stable	stable	7.03179e-05	8.49093e-05	0	2	0	90	32	4
2020	766.792	negative	no	766.791	766.793	26.8964	24.8716	28.0629	766.79154Da/26.8964s	Class 3	Class 3	Class 3	0.000164564	0.000157215	0	6	0	92	68	57
2022	771.805	negative	no	771.805	771.806	26.8721	24.4379	28.0268	771.80533Da/26.87205s	Class 3	Class 2	stable	0.000106778	0.000101161	0	27	0	92	74	18
2023	776.814	negative	no	776.813	776.815	26.7714	24.4379	27.5073	776.81384Da/26.77143s	stable	stable	stable	0.000121584	0.000116582	0	2	0	7	2	18
2024	777.815	negative	no	777.814	777.816	26.7638	24.3105	27.7725	777.81498Da/26.76378s	Class 3	stable	Class 3	0.000104955	0.000114187	0	2	0	92	68	57
2025	778.793	negative	no	778.793	778.794	26.8793	25.9333	27.5036	778.79337Da/26.87933s	Class 3	Class 3	Class 3	0.000107715	0.000133167	0	2	0	53	7	24
2026	778.813	negative	no	778.812	778.813	26.7647	24.3105	27.9922	778.81291Da/26.76472s	stable	stable	stable	8.70945e-05	9.09114e-05	0	1	0	7	70	46
2027	779.295	negative	no	779.294	779.295	26.88	25.2841	27.5087	[('6-[[4-(diethylamino)phenyl]methylidene]-3-(2-methylphenyl)-5-thiazolo[2,3-c][1,2,4]triazolone**', '0.302', '2M-H_chebi', 'C22H22N41'), ('1-(2,3-dihydroindol-1-yl)-2-[(5,5-dimethyl-6H-[1,2,4]triazolo[3,4-a]isoquinolin-3-yl)thio]ethanone**', '0.302', '2M-H_chebi', 'C22H22N41'), ('6-[[4-(diethylamino)phenyl]methylidene]-3-(2-methylphenyl)-5-thiazolo[2,3-c][1,2,4]triazolone**', '0.302', '2M-H_cheb…	stable	Class 3	Class 3	0.00012888	0.000128877	0	1	0	60	11	24
2028	779.793	negative	no	779.793	779.794	26.8674	24.4379	27.9922	779.79319Da/26.86743s	Class 3	Class 3	Class 3	9.57958e-05	0.00010321	0	2	0	53	11	45
2030	782.766	negative	no	782.765	782.766	26.7904	24.724	27.4638	782.76603Da/26.79043s	stable	stable	stable	9.49202e-05	0.000123868	0	2	0	22	38	60
2031	782.768	negative	no	782.767	782.769	26.8964	24.4379	27.9922	782.76784Da/26.8964s	Class 3	Class 3	stable	0.000200818	0.000179702	0	4	0	59	11	2
2032	782.769	negative	no	782.769	782.77	26.8951	25.8333	27.5937	782.76884Da/26.89511s	Class 3	Class 2	stable	0.000191087	0.000155576	0	14	0	28	11	57
2034	785.802	negative	no	785.802	785.803	26.8557	25.313	27.5085	785.80225Da/26.85566s	Class 2	Class 3	Class 3	0.000110744	0.000143688	0	1	0	88	11	30
2035	786.782	negative	no	786.782	786.783	27.1171	25.7017	29.1439	786.78223Da/27.11715s	stable	stable	stable	0.000183102	0.000203547	0	1	0	98	11	3
2036	787.283	negative	no	787.283	787.284	26.8932	26.4486	27.4393	[('5-[2-furanyl-[4-(phenylmethyl)-1-piperidinyl]methyl]-6-thiazolo[3,2-b][1,2,4]triazolol**', '1.692', '2M-H_chebi', 'C21H22N4O2S1'), ('1-methyl-4-[[2-oxo-2-[4-(2-pyridinyl)-1-piperazinyl]ethyl]thio]-2-quinolinone**', '1.692', '2M-H_chebi', 'C21H22N4O2S1'), ('2-[[5-(4-methylphenyl)-1,3,4-oxadiazol-2-yl]thio]-1-(4-phenyl-1-piperazinyl)ethanone**', '1.692', '2M-H_chebi', 'C21H22N4O2S1'), ('5-[2-fur…	Class 3	stable	Class 3	0.000223658	0.000177146	1	5	0	53	62	16
2037	787.781	negative	no	787.78	787.782	26.8951	25.0782	27.5073	787.78096Da/26.89514s	Class 3	Class 3	Class 3	0.000276176	0.000269495	0	1	0	0	11	24
2038	788.778	negative	no	788.778	788.78	26.8926	24.8716	28.0215	788.77849Da/26.89264s	stable	stable	Class 1	0.000120582	0.000102169	0	1	0	60	62	1
2039	792.791	negative	no	792.791	792.793	26.8674	24.4379	27.9922	792.79146Da/26.86743s	stable	stable	stable	0.000168254	0.000180765	0	2	0	92	70	46
2041	793.292	negative	no	793.292	793.293	26.8928	24.8716	27.9922	793.29229Da/26.8928s	Class 3	stable	stable	0.000192478	0.00021034	0	1	0	53	68	16
2042	793.793	negative	no	793.792	793.793	26.8834	24.4379	27.9922	793.79259Da/26.88344s	stable	stable	stable	0.000136071	0.000186034	0	2	0	92	70	81
2043	794.292	negative	no	794.291	794.292	26.8932	25.3476	27.5087	794.29169Da/26.89323s	Class 3	stable	stable	0.000161154	0.000147144	1	3	0	88	68	18
2044	794.79	negative	no	794.789	794.791	26.8788	24.4379	27.9922	794.7898Da/26.87885s	stable	stable	stable	0.000113484	0.000106445	0	2	0	92	70	81
2045	795.767	negative	no	795.767	795.768	26.8743	24.8716	27.4953	795.76727Da/26.87434	Class 3	stable	stable	0.000538149	0.000383001	0	1	4	85	33	16
2046	795.791	negative	no	795.79	795.792	26.8716	24.3105	27.9922	795.7907Da/26.8716s	stable	stable	stable	0.000142214	0.000143794	0	6	0	92	70	87
2047	796.766	negative	no	796.765	796.766	26.7654	25.4103	26.9956	796.76576Da/26.76536s	stable	stable	Class 1	0.000170972	0.00015226	0	3	0	85	25	12
2048	796.784	negative	no	796.784	796.785	26.8964	25.8314	26.9321	796.7843Da/26.8964s	Class 1	Class 2	Class 2	0.000240235	0.000213439	2	5	0	63	22	23
2049	796.785	negative	no	796.785	796.786	26.8505	24.4379	27.9922	796.78527Da/26.85051s	stable	stable	stable	6.4931e-05	7.70753e-05	2	5	2	7	68	3
2051	798.742	negative	no	798.741	798.743	26.2975	23.8841	27.4638	798.74153Da/26.29754	stable	stable	stable	0.000125938	0.000112013	0	3	0	60	23	90
2052	798.744	negative	no	798.743	798.745	26.8964	25.0782	28.0034	[('N-tricontanoylicosasphinganine**', '4.912', 'Cl_chebi', 'C50H101N1O3')]	stable	stable	stable	0.000131377	0.000153839	0	3	0	81	23	57
2053	798.745	negative	no	798.745	798.746	27.4095	26.8958	28.0873	[('N-tricontanoylicosasphinganine**', '2.530', 'Cl_chebi', 'C50H101N1O3')]	Class 3	stable	stable	0.000178659	0.000187129	0	4	0	22	23	38
2054	800.78	negative	no	800.78	800.781	26.8958	24.4379	27.9922	800.78025Da/26.89585s	stable	stable	Class 3	0.000388212	0.000459644	0	0	0	3	26	24
2055	801.281	negative	no	801.28	801.282	26.8961	24.4379	27.9922	801.28109Da/26.89612s	Class 3	stable	stable	0.000203147	0.000285289	0	1	0	53	26	45
2056	801.78	negative	no	801.779	801.78	26.8964	24.4379	27.9922	801.77995Da/26.8964s	stable	stable	stable	0.000190978	0.000264955	0	2	0	53	26	45
2057	802.281	negative	no	802.28	802.281	26.8941	25.0782	27.9922	802.28058Da/26.89412s	stable	stable	Class 3	0.000136614	0.000135793	0	1	0	33	45	12
2058	802.778	negative	no	802.778	802.78	26.8964	24.987	27.9922	802.77829Da/26.8964s	Class 3	stable	Class 3	0.000142853	0.000145519	0	1	0	53	26	24
2059	803.279	negative	no	803.278	803.279	26.8926	26.255	27.456	[('Sulforidazine**', '1.483', '2M-H_hmdb', 'C21H26N2O2S2'), ('Sulforidazine**', '1.483', '2M-H_hmdb', 'C21H26N2O2S2')]	Class 2	stable	Class 3	0.000300437	0.000265466	0	5	4	53	5	87
2060	803.755	negative	no	803.755	803.756	26.8324	25.0782	27.5055	803.75522Da/26.83241	stable	stable	Class 3	0.00034549	0.000273151	0	2	1	23	9	24
2061	804.754	negative	no	804.754	804.756	26.7064	25.0782	27.456	804.75438Da/26.70644	Class 3	Class 3	Class 3	5.52388e-05	6.29238e-05	0	1	0	53	26	24
2062	808.769	negative	no	808.768	808.77	26.8926	24.4379	27.9922	808.76905Da/26.89264s	stable	stable	stable	0.000337326	0.000343218	0	0	4	85	17	46
2063	809.27	negative	no	809.269	809.271	26.8964	24.8716	27.9922	809.2699Da/26.8964s	stable	stable	Class 3	0.000139857	0.000120328	0	1	0	3	17	24
2064	809.771	negative	no	809.77	809.771	26.8929	24.4379	27.9922	809.77061Da/26.89295s	stable	stable	stable	0.000263364	0.000284973	0	0	0	60	17	81
2065	810.269	negative	no	810.269	810.27	26.9272	25.4103	28.0034	810.26931Da/26.92723s	Class 3	Class 3	Class 3	0.000438509	0.000397906	0	2	2	53	86	45
2066	810.767	negative	no	810.766	810.768	26.8928	24.4379	27.9922	810.76656Da/26.8928s	stable	stable	stable	0.000131692	0.000159054	0	1	0	60	17	81
2067	811.744	negative	no	811.743	811.745	26.5352	25.0782	27.4887	811.74367Da/26.53515s	Class 3	stable	Class 3	0.000143695	0.000163997	0	1	0	53	90	21
2068	811.767	negative	no	811.767	811.769	26.8964	25.0782	27.5087	811.76748Da/26.8964s	stable	stable	Class 3	0.000114444	0.000149943	0	2	0	3	84	21
2069	811.769	negative	no	811.769	811.77	26.8964	25.6921	27.4771	811.76936Da/26.8964s	stable	stable	stable	0.000222543	0.000173205	0	4	0	30	0	45
2070	812.762	negative	no	812.761	812.763	26.8908	24.4379	27.9922	812.76189Da/26.89075s	stable	stable	stable	0.000150295	0.000158994	0	2	0	60	17	81
2071	814.718	negative	no	814.717	814.718	26.3082	24.7455	27.7725	814.71754Da/26.30823s	Class 2	Class 3	Class 3	9.97282e-05	0.00011004	1	2	1	49	86	44
2072	814.718	negative	no	814.718	814.72	26.3304	24.3105	27.4208	814.71805Da/26.33038s	stable	stable	stable	0.000174784	0.000156181	0	0	0	85	90	46
2073	814.72	negative	no	814.72	814.722	26.9351	25.0782	27.5937	814.72032Da/26.93511s	stable	stable	stable	0.000129263	0.000125151	0	1	0	81	28	16
2074	814.788	negative	no	814.788	814.789	28.6391	26.5522	29.322	814.78834Da/28.63905s	Class 2	Class 3	stable	0.00292004	0.00140801	10	3	34	27	74	95
2075	816.715	negative	no	816.714	816.716	26.3164	24.4379	27.9922	816.7147Da/26.31642	Class 3	stable	stable	0.000171913	0.000137489	1	2	0	53	63	52
2076	816.758	negative	no	816.757	816.759	26.8964	24.4379	27.9922	816.75766Da/26.8964	Class 3	stable	stable	0.000146373	0.000149852	0	0	0	23	33	52
2077	817.259	negative	no	817.258	817.259	26.9956	25.4103	27.5087	817.25881Da/26.9956s	stable	Class 3	Class 2	0.00110579	0.000725827	0	34	48	23	94	30
2080	824.747	negative	no	824.746	824.747	26.8937	24.4379	27.9922	824.74662Da/26.89368s	stable	stable	stable	0.000620219	0.00057829	3	0	1	22	33	46
2081	825.75	negative	no	825.749	825.75	26.8944	24.4379	27.9922	[('alpha-Amyrin cerotate**', '3.568', 'M-2H_Na_hmdb', 'C56H100O2')]	stable	stable	stable	0.000553043	0.000390439	1	2	3	22	33	46
2082	826.745	negative	no	826.745	826.747	26.8964	25.4103	27.4953	826.74548Da/26.8964	Class 3	Class 2	Class 2	0.000202252	0.000176726	0	2	1	99	28	88
2083	826.747	negative	no	826.747	826.749	26.8954	26.1053	28.0268	826.74733Da/26.89542	stable	Class 3	Class 3	0.000114713	0.000130292	1	1	1	33	82	14
2085	828.739	negative	no	828.739	828.741	26.8934	24.4379	27.9922	828.73941Da/26.89338s	stable	stable	stable	0.000491961	0.000379471	0	1	4	23	33	81
2086	835.784	negative	no	835.783	835.785	26.8363	24.4379	27.5087	835.78388Da/26.83631s	Class 3	stable	stable	9.71369e-05	8.85707e-05	0	2	0	92	70	21
2087	836.285	negative	no	836.284	836.286	26.8324	26.7622	27.4393	836.28465Da/26.83241	Class 3	stable	stable	0.000259887	0.000170984	1	1	0	92	2	16
2088	836.781	negative	no	836.781	836.782	27.4816	25.8805	28.0999	[('(+)-aplysinillin**', '0.295', 'M-2H_K_chebi', 'C23H24Br4N4O8')]	stable	stable	stable	0.000241791	0.000187731	2	2	16	65	83	59
2089	836.782	negative	no	836.782	836.784	27.3151	25.4314	28.561	[('(+)-aplysinillin**', '0.893', 'M-2H_K_chebi', 'C23H24Br4N4O8')]	stable	stable	stable	0.000126863	0.000138678	1	5	4	65	2	87
2090	836.784	negative	no	836.784	836.785	26.8964	24.4379	28.0268	[('(+)-aplysinillin**', '3.018', 'M-2H_K_chebi', 'C23H24Br4N4O8')]	Class 3	stable	Class 3	0.0001264	0.000115658	0	6	0	53	68	27
2091	837.783	negative	no	837.782	837.783	27.3139	25.2794	28.0629	837.78303Da/27.3139s	Class 3	Class 3	stable	0.000150622	0.000154216	0	1	0	92	2	53
2092	843.773	negative	no	843.772	843.774	26.8954	24.4379	27.9922	843.77276Da/26.89542	Class 3	stable	stable	0.000211164	0.000253632	3	6	0	92	74	9
2093	844.274	negative	no	844.273	844.274	26.8964	26.1766	27.5087	844.27375Da/26.8964s	stable	stable	Class 3	0.000252145	0.000242695	0	4	0	98	3	52
2094	844.772	negative	no	844.772	844.774	26.8919	24.8716	27.9922	844.77236Da/26.89193s	Class 3	stable	Class 3	0.000151852	0.000176949	0	1	0	3	68	30
2095	845.273	negative	no	845.272	845.273	26.9614	25.313	27.5085	845.27291Da/26.96141	Class 3	Class 3	Class 2	0.000338593	0.000307571	0	3	0	3	62	53
2096	845.771	negative	no	845.77	845.772	26.9133	25.2794	28.561	845.77059Da/26.91329s	Class 2	Class 3	stable	6.68714e-05	0.00010666	1	1	0	0	11	16
2097	850.781	negative	no	850.781	850.782	26.8492	24.987	28.0034	850.78134Da/26.84921s	Class 3	Class 3	Class 3	0.000211141	0.000166258	0	2	0	3	45	30
2099	851.761	negative	no	851.76	851.761	26.8964	25.0782	28.0268	851.76085Da/26.8964s	stable	stable	stable	9.35883e-05	0.000123162	0	0	0	3	11	45
2100	852.262	negative	no	852.261	852.263	26.926	25.0782	27.4887	852.2618Da/26.92599	stable	Class 3	Class 3	0.000251787	0.000220831	3	4	0	60	17	4
2101	852.759	negative	no	852.758	852.76	26.8964	25.2841	27.7725	852.75893Da/26.8964s	Class 3	Class 3	Class 3	8.19278e-05	8.26371e-05	0	2	0	53	62	12
2103	853.26	negative	no	853.26	853.261	26.8945	25.8314	27.4638	853.26032Da/26.89452s	stable	Class 3	Class 3	0.000117739	0.000141458	0	3	1	3	7	52
2104	853.757	negative	no	853.757	853.758	26.8964	24.987	28.0034	853.75747Da/26.8964	stable	Class 3	Class 3	0.000223647	0.000175941	3	3	1	99	45	27
2105	857.77	negative	no	857.77	857.771	26.8961	25.2794	27.9922	857.77042Da/26.89613s	Class 3	stable	Class 3	0.000133677	0.000121928	0	0	0	20	11	57
2106	858.271	negative	no	858.271	858.272	26.8652	24.8716	28.0034	858.27131Da/26.86519	Class 3	stable	Class 3	8.20964e-05	0.000109159	0	1	0	92	45	57
2107	858.77	negative	no	858.769	858.771	26.8929	24.987	28.0629	858.77004Da/26.89289s	Class 3	stable	Class 3	9.06299e-05	9.70621e-05	0	4	0	92	45	30
2109	859.749	negative	no	859.748	859.75	26.824	25.0782	28.0034	859.74897Da/26.82402s	Class 3	stable	Class 3	0.000220235	0.000193984	0	2	1	85	28	52
2111	860.747	negative	no	860.746	860.747	26.8742	25.2841	27.5073	860.74666Da/26.87415s	stable	Class 3	Class 3	0.000155466	0.000144147	3	22	0	22	47	13
2112	860.786	negative	no	860.785	860.787	28.9247	27.5012	29.9821	860.78597Da/28.92469s	Class 2	Class 2	Class 3	0.0022938	0.0011502	4	3	0	10	19	57
2116	865.759	negative	no	865.758	865.76	26.8964	24.4379	27.9922	865.75895Da/26.8964	stable	stable	Class 3	0.000252946	0.000222853	0	1	0	3	5	24
2117	866.26	negative	no	866.259	866.261	26.8964	25.0782	27.9922	866.25998Da/26.8964s	stable	stable	Class 3	0.00016798	0.000175667	0	1	0	60	26	24
2118	866.759	negative	no	866.758	866.76	26.8951	25.0782	27.9922	866.75907Da/26.89514s	Class 3	stable	Class 3	0.000230569	0.000220036	0	1	0	53	26	53
2120	867.259	negative	no	867.259	867.261	26.9337	25.8559	28.0268	867.2594Da/26.93372s	Class 3	Class 3	Class 2	0.0001529	0.000157367	0	0	0	53	7	53
2121	867.758	negative	no	867.757	867.758	26.9048	25.313	27.5087	[('TG(15:0/18:1(11Z)/o-18:0)**', '0.214', 'Cl_hmdb', 'C54H104O5'), ('TG(15:0/18:1(9Z)/o-18:0)**', '0.214', 'Cl_hmdb', 'C54H104O5'), ('TG(15:0/o-18:0/18:1(11Z))**', '0.214', 'Cl_hmdb', 'C54H104O5'), ('TG(15:0/o-18:0/18:1(9Z))**', '0.214', 'Cl_hmdb', 'C54H104O5'), ('TG(18:1(11Z)/15:0/o-18:0)**', '0.214', 'Cl_hmdb', 'C54H104O5'), ('TG(18:1(9Z)/15:0/o-18:0)**', '0.214', 'Cl_hmdb', 'C54H104O5')]	Class 2	Class 2	Class 2	0.000268967	0.000280457	0	2	0	3	14	46
2122	873.748	negative	no	873.747	873.749	26.8964	24.8716	27.9922	873.74778Da/26.8964	stable	stable	Class 3	0.000160511	0.000146181	0	0	0	22	17	46
2123	874.249	negative	no	874.248	874.25	26.8964	25.0782	27.5087	874.2489Da/26.8964s	Class 3	stable	Class 3	0.000259172	0.000192703	0	2	0	23	0	30
2124	874.748	negative	no	874.747	874.748	26.8993	25.0782	28.0268	874.74778Da/26.89927	stable	stable	Class 3	0.000182465	0.000154308	0	4	2	99	17	52
2126	875.745	negative	no	875.744	875.746	26.8944	25.7017	28.0268	875.74506Da/26.89443s	Class 3	Class 3	Class 2	0.000206554	0.00022238	0	2	1	81	33	30
2127	876.759	negative	no	876.758	876.76	28.6459	26.4575	29.6937	876.75876Da/28.64592s	Class 2	Class 3	Class 3	0.000290481	0.000229779	3	3	0	34	74	57
2128	878.777	negative	no	878.777	878.779	26.765	24.3105	27.7725	878.77716Da/26.76504s	Class 3	stable	stable	8.15899e-05	9.03096e-05	0	1	0	92	70	94
2130	881.736	negative	no	881.736	881.737	26.8993	25.4103	28.0034	[('TG(14:0/15:0/22:1(13Z))**', '0.771', 'Cl_hmdb', 'C54H102O6'), ('TG(14:0/22:1(13Z)/15:0)**', '0.771', 'Cl_hmdb', 'C54H102O6'), ('TG(15:0/14:0/22:1(13Z))**', '0.771', 'Cl_hmdb', 'C54H102O6'), ('TG(15:0/16:0/20:1(11Z))**', '0.771', 'Cl_hmdb', 'C54H102O6'), ('TG(15:0/18:0/18:1(11Z))**', '0.771', 'Cl_hmdb', 'C54H102O6'), ('TG(15:0/18:0/18:1(9Z))**', '0.771', 'Cl_hmdb', 'C54H102O6'), ('TG(15:0/20:0/…	Class 3	stable	Class 2	0.000757853	0.000866213	0	7	29	85	28	30
2131	882.238	negative	no	882.237	882.238	27.0148	25.4103	28.0268	882.2379Da/27.01477s	stable	Class 3	stable	0.000474271	0.000337587	1	4	0	99	63	44
2136	894.754	negative	no	894.753	894.755	26.8645	24.4379	27.9922	894.75382Da/26.86452	Class 3	stable	stable	8.97372e-05	8.03787e-05	2	0	0	23	70	45
2137	894.755	negative	no	894.755	894.755	26.8964	25.8048	27.4638	894.75489Da/26.8964	Class 3	Class 3	Class 3	0.000206808	0.000159973	0	1	0	85	11	37
2138	896.748	negative	no	896.747	896.749	26.8948	26.3339	27.4638	[('PE-NMe2(22:0/24:0)**', '0.757', 'M-H-H2O_hmdb', 'C53H106N1O8P1'), ('PE-NMe2(24:0/22:0)**', '0.757', 'M-H-H2O_hmdb', 'C53H106N1O8P1')]	Class 3	stable	Class 3	6.47288e-05	6.73718e-05	0	2	0	28	79	57
2139	896.749	negative	no	896.749	896.751	26.8944	24.987	27.7725	[('PE-NMe2(22:0/24:0)**', '2.264', 'M-H-H2O_hmdb', 'C53H106N1O8P1'), ('PE-NMe2(24:0/22:0)**', '2.264', 'M-H-H2O_hmdb', 'C53H106N1O8P1')]	Class 3	Class 3	Class 3	0.000195151	0.000149619	0	2	0	27	71	57
2141	900.762	negative	no	900.761	900.762	27.3478	25.8805	28.1153	900.76153Da/27.34782	Class 3	stable	Class 3	0.000129103	0.000134031	0	2	0	92	93	88
2143	901.763	negative	no	901.762	901.763	26.8674	25.2794	27.5085	901.7629Da/26.86743s	Class 3	Class 3	Class 3	0.000144518	0.000143056	1	8	0	92	45	24
2144	902.263	negative	no	902.262	902.264	26.9048	25.313	27.4797	[('Aquifoliunine EI**', '1.609', 'Cl_hmdb', 'C43H49N1O18')]	Class 3	Class 3	Class 2	0.000138555	0.000140673	0	5	6	92	11	53
2145	902.762	negative	no	902.761	902.763	27.3365	25.4314	27.4891	902.7618Da/27.33654s	Class 3	stable	stable	0.000156365	0.000141526	0	5	0	53	70	94
2146	906.772	negative	no	906.771	906.773	26.8505	24.4379	27.7725	906.77201Da/26.85051s	Class 3	Class 3	stable	0.000152699	0.000183651	0	1	0	28	2	81
2147	906.773	negative	no	906.773	906.774	26.9003	25.3749	28.561	906.7729Da/26.90026s	Class 2	Class 2	Class 2	0.000169284	0.000156439	0	5	1	9	68	57
2148	907.772	negative	no	907.772	907.773	26.3406	24.987	27.7725	[('tg(18:0/20:4(5z,8z,11z,14z)/18:1(9z))**', '3.669', 'M-H_chebi', 'C59H104O6'), ('triacylglycerol 56:5**', '3.669', 'M-H_chebi', 'C59H104O6')]	Class 3	Class 3	Class 3	0.000219033	0.000172629	0	1	0	92	11	21
2149	908.75	negative	no	908.749	908.751	27.0148	25.2841	28.0268	[('phosphatidylcholine 46:1**', '2.069', 'M-H-H2O_chebi', 'C54H106N1O8P1')]	Class 3	Class 3	Class 3	0.000192846	0.000197957	0	2	0	0	11	12
2150	909.252	negative	no	909.252	909.253	26.8938	25.2841	28.0034	909.25213Da/26.89382	Class 3	Class 2	Class 3	0.000250585	0.000215213	0	26	2	53	66	12
2151	909.751	negative	no	909.75	909.752	26.8944	25.0782	27.5087	909.75083Da/26.89443s	Class 3	stable	stable	0.000127389	0.000124615	0	3	0	53	59	53
2152	910.252	negative	no	910.251	910.252	26.8809	26.255	27.4771	910.25181Da/26.88093s	Class 3	Class 3	Class 2	0.000127552	0.000127894	0	6	10	53	7	12
2153	912.723	negative	no	912.722	912.724	26.705	25.2832	27.2691	912.72323Da/26.70498s	Class 3	stable	stable	9.70093e-05	8.83798e-05	4	3	0	46	10	22
2154	912.724	negative	no	912.724	912.725	26.8964	25.0782	28.0268	912.72432Da/26.8964	stable	stable	Class 3	0.000107636	0.000115097	0	4	0	59	10	38
2155	915.761	negative	no	915.76	915.761	27.3505	26.4486	28.0034	[('TG(15:0/22:5(4Z,7Z,10Z,13Z,16Z)/o-18:0)**', '3.555', 'Cl_hmdb', 'C58H104O5'), ('TG(15:0/22:5(7Z,10Z,13Z,16Z,19Z)/o-18:0)**', '3.555', 'Cl_hmdb', 'C58H104O5'), ('TG(15:0/o-18:0/22:5(4Z,7Z,10Z,13Z,16Z))**', '3.555', 'Cl_hmdb', 'C58H104O5'), ('TG(15:0/o-18:0/22:5(7Z,10Z,13Z,16Z,19Z))**', '3.555', 'Cl_hmdb', 'C58H104O5'), ('TG(22:5(4Z,7Z,10Z,13Z,16Z)/15:0/o-18:0)**', '3.555', 'Cl_hmdb', 'C58H104O5…	Class 3	Class 3	Class 3	0.000189359	0.00014211	0	5	0	39	83	44
2156	916.739	negative	no	916.738	916.739	27.4208	25.8314	28.6942	[('phosphatidylcholine 44:0-OH**', '1.074', 'M-H_chebi', 'C52H104N1O9P1')]	stable	stable	stable	0.000117918	0.000144795	2	1	1	60	57	1
2157	917.239	negative	no	917.239	917.241	26.9272	26.7279	27.4887	[('kaempferol 3-O-[6-(4-coumaroyl)-beta-D-glucosyl-(1->2)-beta-D-glucosyl-(1->2)-beta-D-glucoside]**', '4.058', 'M-H_chebi', 'C42H46O23'), ("quercetin 3-O-alpha-L-[6'''-p-coumaroyl-beta-D-glucopyranosyl-(1->2)-rhamnopyranoside]-7-O-beta-D-glucopyranoside**", '4.058', 'M-H_chebi', 'C42H46O23')]	Class 3	stable	Class 3	0.000435255	0.000423356	0	3	22	53	99	57
2158	917.738	negative	no	917.737	917.739	26.7861	25.313	27.5073	[('tg(18:1(9z)/18:1(9z)/18:2(9z,12z))**', '0.632', 'Cl_chebi', 'C57H102O6'), ('triacylglycerol 54:4**', '0.632', 'Cl_chebi', 'C57H102O6'), ('TG(18:2(9Z,12Z)/16:0/20:2(11Z,14Z))[iso6]**', '0.632', 'Cl_chebi', 'C57H102O6'), ('TG(18:1(9Z)/18:1(11Z)/18:2(9Z,12Z))[iso6]**', '0.632', 'Cl_chebi', 'C57H102O6'), ('TG(18:1(9Z)/18:0/18:3(9Z,12Z,15Z))[iso6]**', '0.632', 'Cl_chebi', 'C57H102O6'), ('TG(16:0/18…	Class 3	Class 3	Class 3	0.000414523	0.000295525	0	9	0	85	63	46
2159	918.736	negative	no	918.735	918.736	26.8944	25.4103	28.0629	918.73566Da/26.89443	stable	Class 3	Class 3	8.60276e-05	8.26052e-05	0	2	0	3	7	30
2160	922.75	negative	no	922.749	922.751	26.8674	24.8716	27.9922	922.74951Da/26.86743	stable	stable	stable	0.000172744	0.000148068	0	2	0	92	70	1
2161	922.751	negative	no	922.751	922.753	26.8938	24.4379	27.6095	922.75121Da/26.89382	stable	stable	stable	0.000136774	0.000124498	0	3	0	60	62	3
2162	923.25	negative	no	923.25	923.251	26.8935	25.313	27.9922	923.25022Da/26.89348s	Class 3	Class 3	Class 3	0.000112991	0.000126971	0	1	0	53	25	12
2163	923.75	negative	no	923.75	923.751	26.8941	24.4379	27.9922	923.7503Da/26.89411s	stable	stable	stable	0.000141433	0.000147005	0	2	0	53	70	81
2164	924.25	negative	no	924.249	924.25	27.175	26.255	27.5073	[("6a, 3'-p-Dihydroxypaclitaxel**", '1.096', 'Cl_hmdb', 'C45H47N1O18')]	Class 3	stable	Class 2	0.000297718	0.000246704	0	17	25	92	45	87
2165	924.75	negative	no	924.749	924.751	26.8938	24.4379	27.9922	924.74964Da/26.89377	stable	stable	stable	9.62251e-05	0.000121835	0	2	0	60	45	52
2166	924.751	negative	no	924.751	924.752	26.8944	25.0782	27.5085	924.7511Da/26.89443	Class 1	Class 1	Class 1	0.000216456	0.000149773	0	3	1	9	66	65
2168	930.738	negative	no	930.738	930.739	26.8964	24.8716	27.9922	930.73846Da/26.8964	stable	stable	Class 3	0.0002739	0.000262501	0	1	0	3	5	24
2169	931.239	negative	no	931.238	931.24	26.8964	24.8716	28.0034	[('3,4,5-trihydroxy-6-(2-hydroxy-4-{5-hydroxy-4-oxo-6,8-bis[3,4,5-trihydroxy-6-(hydroxymethyl)oxan-2-yl]-7-[(3,4,5-trihydroxy-6-methyloxan-2-yl)oxy]-4H-chromen-2-yl}phenoxy)oxane-2-carboxylic acid**', '3.115', 'M-H_hmdb', 'C39H48O26'), ('3,4,5-trihydroxy-6-(2-hydroxy-5-{5-hydroxy-4-oxo-6,8-bis[3,4,5-trihydroxy-6-(hydroxymethyl)oxan-2-yl]-7-[(3,4,5-trihydroxy-6-methyloxan-2-yl)oxy]-4H-chromen-2-yl…	stable	stable	Class 3	9.41948e-05	0.000135953	0	2	0	3	17	30
2170	931.738	negative	no	931.738	931.74	26.8964	25.0782	27.9922	[("1-O-[(6'-O-tetradecanoyl)-a-D-glucopyranosyl]-(2-tetradecanoyloxy)-eicosan-1-ol**", '1.150', 'Cl_lipid', 'C54H104O9')]	Class 3	stable	Class 3	0.000193626	0.000268435	0	1	0	85	5	53
2171	932.239	negative	no	932.238	932.239	26.9203	25.0782	27.4887	932.23855Da/26.92033	stable	Class 3	Class 3	0.000502266	0.000480091	3	2	4	3	82	72
2172	932.737	negative	no	932.737	932.738	26.9402	25.0782	27.5062	[('phosphatidylcholine 44:0-2OH**', '4.869', 'M-H_chebi', 'C52H104N1O10P1')]	Class 3	Class 3	Class 1	0.00019559	0.000170683	0	3	0	60	82	53
2173	938.727	negative	no	938.726	938.727	26.8935	24.4379	27.9922	938.72693Da/26.89353s	Class 3	stable	Class 3	0.000617468	0.000561435	0	1	0	23	17	45
2174	939.228	negative	no	939.227	939.229	26.9007	25.0782	28.0034	939.22782Da/26.90074	Class 3	stable	Class 2	0.000225216	0.000270851	0	5	6	53	0	4
2175	939.728	negative	no	939.728	939.729	26.8944	24.4379	27.9922	939.72823Da/26.89442	stable	stable	Class 3	0.000270311	0.000233389	0	2	0	3	28	60
2176	940.227	negative	no	940.226	940.228	26.8276	25.7017	27.4887	940.22722Da/26.82756s	Class 2	Class 3	Class 2	0.000269742	0.000223636	0	3	2	99	23	30
2177	940.725	negative	no	940.724	940.726	26.8951	24.4379	27.9922	940.72494Da/26.89514s	stable	stable	stable	0.000133535	0.000152941	0	2	0	85	17	46
2178	940.726	negative	no	940.726	940.727	26.8674	25.3476	27.4887	940.72575Da/26.86743s	Class 3	stable	Class 3	9.55837e-05	8.94586e-05	0	3	0	53	33	17
2179	941.726	negative	no	941.725	941.726	26.7904	26.4486	27.4887	941.72569Da/26.79043s	Class 3	stable	Class 3	0.000166242	0.000139943	0	1	0	53	11	45
2180	942.722	negative	no	942.721	942.722	26.8964	25.2841	28.0034	942.72177Da/26.8964s	Class 3	Class 3	stable	0.000246794	0.000194941	0	4	0	9	7	16
2181	944.747	negative	no	944.746	944.747	28.7171	27.6356	29.322	944.74682Da/28.71706s	Class 2	Class 3	Class 3	0.000360364	0.000240954	3	2	0	88	32	57
2182	946.715	negative	no	946.715	946.716	26.9062	25.0782	27.5087	[('LacCer(d18:0/22:0)**', '4.885', 'M-H_lipid', 'C52H101N1O13')]	stable	stable	Class 2	0.000245812	0.000230914	0	5	42	85	33	9
2183	947.217	negative	no	947.216	947.217	26.9614	25.0782	28.0034	[('targocil**', '1.868', '2M-H_meta', 'C22H23N4O4S1Cl1'), ('targocil**', '1.868', '2M-H_meta', 'C22H23N4O4S1Cl1')]	Class 2	Class 2	Class 3	0.000333209	0.000267685	1	8	0	95	28	12
2186	954.704	negative	no	954.704	954.705	26.8928	24.4379	27.9922	954.70428Da/26.8928	stable	stable	stable	0.00023869	0.00022164	0	1	0	85	33	45
2187	955.707	negative	no	955.707	955.708	26.8938	25.0782	27.4953	[('menaquinone-<i>11</i>**', '3.296', 'Cl_meta', 'C66H96O2')]	Class 2	Class 3	Class 2	0.000137521	0.000126465	0	7	1	22	82	53
2188	966.738	negative	no	966.737	966.739	27.3942	25.4314	27.7725	[('TG(20:4(5Z,8Z,11Z,14Z)/18:2(9Z,12Z)/20:4(5Z,8Z,11Z,14Z)) (d5)**', '1.354', 'Cl_lipid', 'C61H93D5O6')]	stable	stable	stable	0.000123303	0.000163859	0	3	0	76	74	46
2189	966.74	negative	no	966.739	966.741	26.8954	25.5237	28.1128	[('TG(20:4(5Z,8Z,11Z,14Z)/18:2(9Z,12Z)/20:4(5Z,8Z,11Z,14Z)) (d5)**', '3.179', 'Cl_lipid', 'C61H93D5O6')]	Class 1	stable	stable	0.000133738	0.000138578	0	2	0	3	2	52
2190	979.74	negative	no	979.739	979.741	26.8964	26.4486	27.4421	979.73989Da/26.8964s	Class 3	stable	Class 3	0.000176246	0.000178663	0	4	0	3	70	24
2191	980.24	negative	no	980.24	980.241	26.8926	26.4486	27.456	980.24029Da/26.89264s	Class 3	Class 3	Class 3	0.000117376	0.00010346	2	6	0	53	11	24
2194	982.713	negative	no	982.713	982.714	26.8612	25.0782	27.4887	982.71309Da/26.86117	Class 3	Class 3	Class 3	0.000220395	0.000200296	0	1	0	53	47	87
2195	987.729	negative	no	987.728	987.73	26.8964	25.2794	27.9922	987.72855Da/26.8964	Class 3	stable	Class 3	0.000103445	0.00011212	0	0	0	3	68	30
2196	988.229	negative	no	988.228	988.23	26.8941	25.2841	27.9922	[('3-[(3aS,4S,5R,7aS)-5-hydroxy-7a-methyl-1,5-dioxo-octahydroinden-4-yl]propanoyl-CoA**', '4.735', 'M-H_chebi', 'C34H54N7O19P3S1')]	Class 3	stable	Class 3	0.0001453	0.000140739	0	3	1	53	11	12
2197	988.728	negative	no	988.728	988.729	26.8951	24.8716	27.9922	988.72841Da/26.89514s	Class 3	stable	stable	0.000269735	0.000281802	0	1	0	92	55	45
2198	989.229	negative	no	989.228	989.23	26.9272	25.313	27.5085	989.2287Da/26.92723	Class 3	Class 3	Class 2	0.000170327	0.000212667	0	2	0	53	11	30
2199	989.728	negative	no	989.728	989.729	26.8964	25.3749	28.0629	989.72824Da/26.8964	Class 3	Class 2	stable	0.000149759	0.000134672	0	7	0	88	25	16
2200	995.717	negative	no	995.716	995.718	26.8964	24.4379	27.9922	[('TG(20:5(5Z,8Z,11Z,14Z,17Z)/22:6(4Z,7Z,10Z,13Z,16Z,19Z)/22:6(4Z,7Z,10Z,13Z,16Z,19Z))[iso3]**', '3.395', 'M-H_lipid', 'C67H96O6')]	Class 3	stable	Class 3	0.000107075	0.000134719	0	1	0	85	26	21
2201	996.218	negative	no	996.217	996.219	26.8964	25.0782	27.9922	996.21799Da/26.8964	stable	stable	Class 3	9.53718e-05	0.000129329	0	2	0	3	26	30
2202	996.717	negative	no	996.716	996.718	26.8964	25.0782	28.0034	996.71688Da/26.8964	Class 3	Class 3	Class 2	0.000202421	0.000239479	0	3	3	0	11	53
2205	997.716	negative	no	997.715	997.717	26.9133	25.0782	27.5073	997.71555Da/26.91329	Class 3	Class 3	Class 2	0.00017823	0.000168652	0	4	2	53	82	53
2206	998.216	negative	no	998.215	998.216	27.1255	26.685	27.4891	998.21623Da/27.12546s	Class 3	Class 3	Class 2	0.00011358	0.00012012	0	1	0	3	11	87
