# Supplementary material for: Longitudinal wastewater sampling in buildings reveals temporal dynamics of metabolites
Source: PLOS journal article supplement (doi:10.1371/journal.pcbi.1008001), 2020-06-29

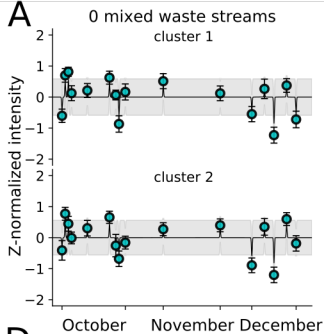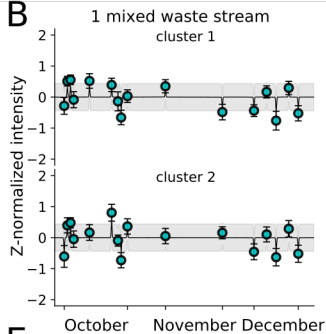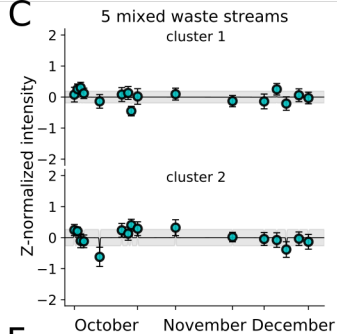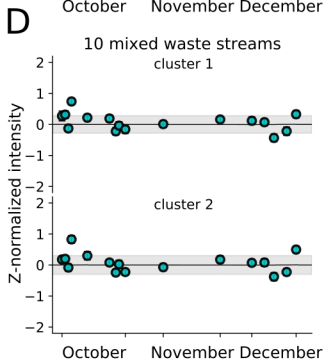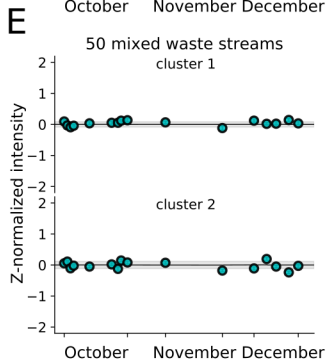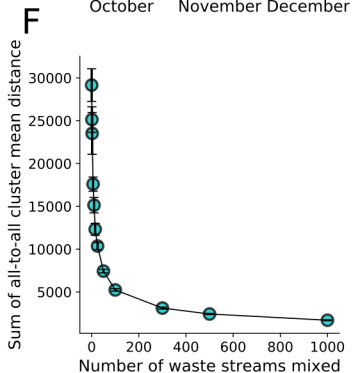

Supplement: S18 (10.1371/journal.pcbi.1008001.s018) [file journal.pcbi.1008001.s018]
